# Supplementary material for: Palladium-catalyzed disilylation of ortho-halophenylethylenes enabled by 2-pyridone ligand
Source: Royal Society of Chemistry journal article supplement (doi:10.1039/d3cc01452e), 2023-01-01

## Supporting Information

# Palladium-catalyzed disilylation of *ortho*-halophenylethylenes enabled by 2-pyridone ligand

Bin-Bin Zhu,<sup>b</sup> Shu-Sheng Zhang,<sup>a</sup> Jian-Guo Fu,<sup>a</sup> Guo-Qiang Lin<sup>\*ab</sup> and Chen-Guo Feng<sup>\*ab</sup>

<sup>a</sup>The Research Center of Chiral Drugs, Innovation Research Institute of Traditional Chinese Medicine, Shanghai University of Traditional Chinese Medicine, Shanghai, 201203, China

<sup>b</sup>Key Laboratory of Synthetic Chemistry of Natural Substances, Center for Excellence in Molecular Synthesis, Shanghai Institute of Organic Chemistry, University of Chinese Academy of Sciences, Shanghai, 200032, China

## Table of Contents

|                                                                                                                   |     |
|-------------------------------------------------------------------------------------------------------------------|-----|
| 1. General Information .....                                                                                      | S2  |
| 2. Reaction Development.....                                                                                      | S2  |
| 3. Preparation of Substrates .....                                                                                | S5  |
| 4. General Procedure for the Disilylation Reaction of <i>ortho</i> -Halophenylethylenes.....                      | S6  |
| 5. Synthetic Transformations of the Disilylated Product 3a.....                                                   | S13 |
| 5.1 Vinyl Halogenation Reaction .....                                                                             | S13 |
| 5.2 Acylation of 3a.....                                                                                          | S14 |
| 5.3 Substitution Reaction of 3a with Ethyl Glyoxylate .....                                                       | S15 |
| 6. The Influence of the Equivalent of 2-Pyridone Ligand on the Formation of Aryl-Vinyl-Palladacycle Species ..... | S16 |
| 7. References .....                                                                                               | S17 |
| 8. NMR Spectra .....                                                                                              | S18 |

---

## 1. General Information

Unless otherwise noted, reagents received from commercial suppliers (Adamas, Bidepharm, Macklin, TCI, Aladdin, Energy, Sigma-Aldrich, etc.) were used as received. Solvents dried with molecular sieves were obtained from J&K, Macklin, Energy or Acros and used directly without further purification. Reactions were monitored by thin layer chromatography (TLC) supplied by Yantai Jiangyou Silicon Material Company (China). Visualization was accomplished with UV light or basic aqueous potassium permanganate (KMnO<sub>4</sub>). Chromatography was conducted using forced flow (flash chromatography) of the indicated solvent system on 300-400 mesh silica gel (Silicycle flash F60). Preparative TLC was performed on silica gel 60 HSGF254 plates (Yantai Jiangyou) and observation of plates was carried out under UV light (254 nm).

Nuclear Magnetic Resonance (NMR) spectra were acquired on Varian mercury-400 and Bruker AM-400 spectrometers. Chemical shifts are reported in  $\delta$  ppm referenced to internal SiMe<sub>4</sub> (TMS) standard or residual solvent peaks: TMS ( $\delta$  0.00 ppm) for <sup>1</sup>H NMR in Chloroform-*d* and DMSO-*d*<sub>6</sub>; solvents' carbon resonances (Chloroform-*d*  $\delta$  77.00 and DMSO-*d*<sub>6</sub>  $\delta$  39.50) for <sup>13</sup>C NMR. Multiplicities are denoted as s (singlet), d (doublet), t (triplet), q (quartet), p (quintet), h (sextet), m (multiplet), and br (broad).

## 2. Reaction Development

### Optimization of Reaction Conditions

To a 10 mL sealed tube charged with a stir bar were added a mixture of Pd precursor, ligand, base, and additives (if applicable). The sealed tube was capped with a Teflon thread plug, and then degassed and backfilled with argon (this procedure was repeated three times). Then hexamethyldisilane (**1**), 1-iodo-2-vinylbenzene (**2a**) and solvent were added under argon. The tube was sealed and the reaction mixture was stirred at a certain temperature for the specified amount of time. After the reaction mixture was cooled to room temperature, dodecane (internal standard, 12.5  $\mu$ L) and dichloromethane (2 mL) were added. An aliquot (0.1 mL) from the mixture was further diluted with dichloromethane and filtered and then analyzed by GC-FID. The yield and conversion were calculated against a calibration curve obtained for the authentic product and starting materials.

Note: when the loading of Pd precursor or ligand was too low to weigh accurately, a solution of the Pd precursor or ligand in the same solvent applied for the reaction was prepared in a certain concentration and used instead of the pure form.

**Table S1** Initial Screening of Reaction Conditions

| entry | variation/additive                                              | T/°C     | conversion (%) <sup>a</sup> | 3a (%) <sup>a</sup> |
|-------|-----------------------------------------------------------------|----------|-----------------------------|---------------------|
| 1     | --                                                              | 35 (62h) | 8                           | 2                   |
| 2     | --                                                              | 60 (36h) | 70                          | 6                   |
| 3     | + 0.5 eq. HCOOH                                                 | 35 (86h) | 10                          | 1.6                 |
| 4     | 2.5 mol % Pd <sub>2</sub> (dba) <sub>3</sub> ·HCCl <sub>3</sub> | 35 (86h) | 24                          | 0.7                 |
| 5     | as substrate                                                    | 80 (15h) | 100                         | 1                   |
| 6     | as substrate                                                    | 80 (15h) | 100                         | 1.5                 |

<sup>a</sup>GC yield using dodecane as an internal standard.**Table S2** Screening of the reaction conditions

| entry | variation/additive                                         | T/°C     | conversion (%) <sup>a</sup> | 3a (%) <sup>a</sup> |
|-------|------------------------------------------------------------|----------|-----------------------------|---------------------|
| 1     | --                                                         | 60 (16h) | 77                          | 27                  |
| 2     | 10 mol % L1                                                | 60 (21h) | 100                         | 25                  |
| 3     | --                                                         | 35 (74h) | 55                          | 21                  |
| 4     | 1 mol % Pd(PhCN) <sub>2</sub> Cl <sub>2</sub> , 4 mol % L1 | 60 (74h) | 89                          | 13                  |
| 5     | as substrate                                               | 60 (24h) | 100                         | 14                  |
| 6     | 0.5 mL DMF                                                 | 40 (71h) | 100                         | 37                  |
| 7     | 0.5 mL DMF, 5 mol % L1                                     | 40 (33h) | 100                         | 37                  |
| 8     | 0.5 mL DMF, Pd(OAc) <sub>2</sub> instead                   | 40 (71h) | 100                         | 37                  |

<sup>a</sup>GC yield using dodecane as an internal standard.

**Table S3** Selected Conditions Screening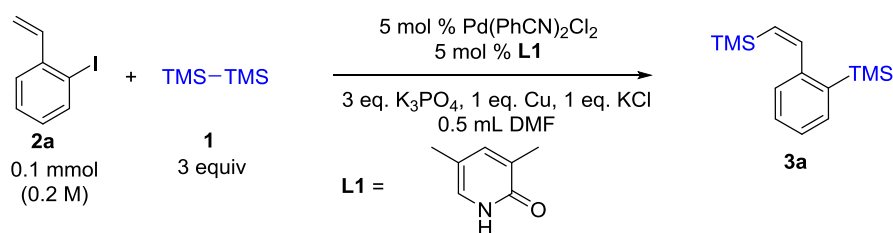

| entry | variation/additive                      | T/°C     | conversion (%) <sup>a</sup> | <b>3a</b> (%) <sup>a</sup> |
|-------|-----------------------------------------|----------|-----------------------------|----------------------------|
| 1     | 10 mol % CuCl                           | 50 (12h) | 100                         | 43                         |
| 2     | without Cu & KCl                        | 50 (15h) | 100                         | 29                         |
| 3     | Cs <sub>2</sub> CO <sub>3</sub> as base | 50 (17h) | 45                          | 19                         |
| 4     | KO <sup>t</sup> Bu as base              | 50 (12h) | 100                         | 0                          |
| 5     | DMA as solvent                          | 50 (12h) | 100                         | 48                         |
| 6     | NMP as solvent                          | 50 (12h) | 100                         | 49                         |

<sup>a</sup>GC yield using dodecane as an internal standard.

**Table S4** Screening of additives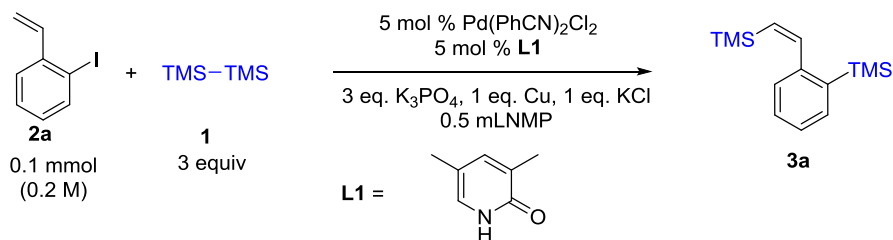

| entry | variation/additive                                              | T/°C     | conversion (%) <sup>a</sup> | <b>3a</b> (%) <sup>a</sup> |
|-------|-----------------------------------------------------------------|----------|-----------------------------|----------------------------|
| 1     | 10 mol % CuCl                                                   | 50 (15h) | 100                         | 51                         |
| 2     | 20 mol % CuCl                                                   | 50 (15h) | 100                         | 60                         |
| 3     | 10 % CuCl, 2.5 % Pd, 3.0% L1                                    | 50 (15h) | 100                         | 68                         |
| 4     | 20 mol % CuCl, without Cu                                       | 50 (15h) | 100                         | 57                         |
| 5     | 20 mol % CuCl, without Cu & KCl                                 | 50 (15h) | 100                         | 65                         |
| 6     | 10 mol % CuCl, 5 eq. TMS <sub>2</sub>                           | 50 (15h) | 100                         | 54                         |
| 7     | 10 mol % CuCl, additional 1 eq. Cs <sub>2</sub> CO <sub>3</sub> | 50 (15h) | 100                         | 55                         |

<sup>a</sup>GC yield using dodecane as an internal standard.

**Table S5** Screening of ligands and the equivalents of additives and catalysts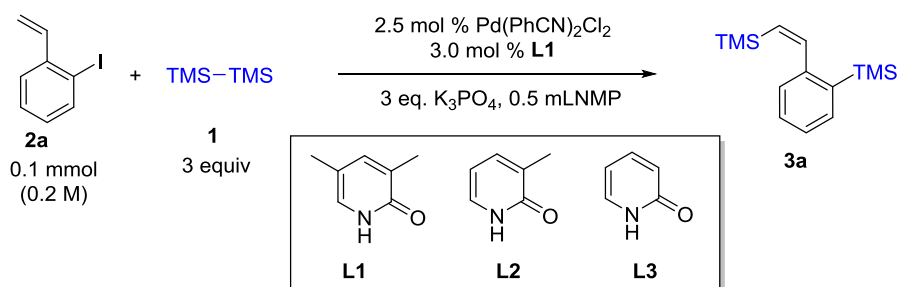

| entry | variation/additive                                               | T/°C     | conversion (%) <sup>a</sup> | <b>3a</b> (%) <sup>a</sup> |
|-------|------------------------------------------------------------------|----------|-----------------------------|----------------------------|
| 1     | 20 mol % CuCl                                                    | 50 (16h) | 85                          | 65                         |
| 2     | 30 mol % CuCl                                                    | 50 (16h) | 73                          | 53                         |
| 3     | 50 mol % CuCl                                                    | 50 (16h) | 75                          | 55                         |
| 4     | 20 % CuCl, 1 % Pd, 1.2% <b>L1</b>                                | 50 (40h) | 100                         | 81.5                       |
| 5     | 20 % CuCl, 1 % Pd, 1.4% <b>L1</b>                                | 50 (40h) | 100                         | 82.3                       |
| 6     | 0.2 mmol scale, 20 % CuCl<br>1 % Pd, 1.2% <b>L1</b> , 0.5 mL DMF | 50 (40h) | 100                         | 78                         |
| 7     | 20 % CuCl, 1 % Pd, 1.4% <b>L2</b>                                | 50 (35h) | 100                         | 84                         |
| 8     | 20 % CuBr, 1 % Pd, 1.4% <b>L2</b>                                | 60 (16h) | 100                         | 84                         |
| 9     | 20 % CuI, 1 % Pd, 1.4% <b>L2</b>                                 | 60 (16h) | 100                         | 86                         |
| 10    | 20 % CuCl, 1 % Pd, 1.4% <b>L3</b>                                | 60 (16h) | 100                         | 83                         |
| 11    | 20 % CuI, 0.5 % Pd, 0.7% <b>L2</b>                               | 60 (23h) | 100                         | 87                         |

<sup>a</sup>GC yield using dodecane as an internal standard.

### 3. Preparation of Substrates

The substrates *ortho*-halophenylethylenes (**2**) are all known compounds and were synthesized according to the reported procedures<sup>1</sup>.

#### 4. General Procedure for the Disilylation Reaction of *ortho*-Halophenylethylenes

**Standard reaction conditions:** To a 10 mL sealed tube charged with a stir bar was added a mixture of CuI (11.4 mg, 0.06 mmol, 20 mol %), K<sub>3</sub>PO<sub>4</sub> (192 mg, 0.9 mmol, 3 equiv.) and P(*o*-Tol)<sub>3</sub> (3.7 mg, 0.012 mmol, 4 mol %, if applied for *ortho*-bromophenylethylenes). The tube was capped with a Teflon thread plug, and then degassed and backfilled with argon (this procedure was repeated three times). Then Pd(PhCN)<sub>2</sub>Cl<sub>2</sub> (0.0015 mmol, 0.5 mol %, an NMP solution was used instead of the pure form), 3-methylpyridin-2(1H)-one (0.0021 mmol, 0.7 mol %, an NMP solution was used instead of the pure form), *ortho*-halophenylethylene (0.3 mmol, 1 equiv), hexamethyldisilane (186  $\mu$ L, 0.9 mmol, 3 equiv) and NMP (1.5 mL) were added under argon. The tube was sealed immediately and the reaction mixture was stirred at 60°C for 24-48 h (*ortho*-iodophenylethylene) or 70°C for 14-18 h (*ortho*-bromophenylethylene). After cooling to room temperature, the mixture was poured into water (15 mL), extracted with petroleum ether, dried over Na<sub>2</sub>SO<sub>4</sub> and concentrated. The pure product was then isolated by flash column chromatography unless otherwise noted.

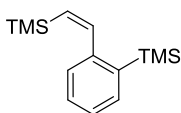

**3a:** 66.5 mg, 89% yield. Colorless oil. <sup>1</sup>H NMR (400 MHz, Chloroform-*d*)  $\delta$  7.62 (d, *J* = 14.9, 1H), 7.48 (dd, *J* = 7.2, 1.6, 1H), 7.30 (td, *J* = 7.4, 1.6, 1H), 7.27 – 7.21 (m, 1H), 7.19 (d, *J* = 7.1, 1H), 5.86 (d, *J* = 14.9, 1H), 0.29 (s, 9H), -0.09 (s, 9H). <sup>13</sup>C NMR (101 MHz, Chloroform-*d*)  $\delta$  = 148.6, 146.9, 137.7, 133.7, 133.2, 128.6, 128.5, 126.4, 0.0, -0.2. HRMS (FI): *m/z* for C<sub>14</sub>H<sub>24</sub>Si<sub>2</sub> [M]<sup>+</sup> calcd.: 248.1411, found: 48.1410.

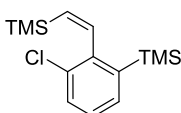

**3b:** 84.1 mg, 98% yield. Colorless oil. <sup>1</sup>H NMR (400 MHz, Chloroform-*d*)  $\delta$  7.39 – 7.33 (m, 2H), 7.27 (d, *J* = 15.1, 1H), 7.16 (ddd, *J* = 8.0, 7.2, 0.8, 1H), 6.08 (d, *J* = 15.3, 1H), 0.27 (s, 9H), -0.16 (s, 9H). <sup>13</sup>C NMR (101 MHz, Chloroform-*d*)  $\delta$  = 144.7, 142.8, 140.9, 136.7, 132.9, 132.1, 129.8, 127.5, 0.1, -1.3. HRMS (FI): *m/z* for C<sub>14</sub>H<sub>23</sub>ClSi<sub>2</sub> [M]<sup>+</sup> calcd.: 282.1021, found: 282.1019.

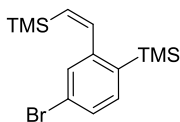

**3c:** 83.3 mg, 85% yield. Colorless oil.  $^1\text{H NMR}$  (400 MHz, Chloroform-*d*)  $\delta$  7.53 (d,  $J = 14.8$ , 1H), 7.40 – 7.32 (m, 2H), 7.32 (d,  $J = 7.8$ , 1H), 5.91 (d,  $J = 14.8$ , 1H), 0.27 (s, 9H), -0.05 (s, 9H).  $^{13}\text{C NMR}$  (101 MHz, Chloroform-*d*)  $\delta$  148.6, 146.9, 136.5, 135.3, 134.8, 131.5, 129.2, 123.1, 0.0, -0.3. **HRMS** (FI):  $m/z$  for  $\text{C}_{14}\text{H}_{23}\text{BrSi}_2$   $[\text{M}]^+$  calcd.: 326.0516, found: 326.0515.

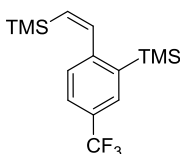

**3d:** 93.5 mg, 98% yield. Colorless oil.  $^1\text{H NMR}$  (400 MHz, Chloroform-*d*)  $\delta$  7.71 (s, 1H), 7.62 – 7.54 (m, 2H), 7.30 (d,  $J = 7.9$ , 1H), 5.99 (d,  $J = 15.0$ , 1H), 0.34 (s, 9H), -0.06 (s, 9H).  $^{13}\text{C NMR}$  (101 MHz, Chloroform-*d*)  $\delta$  150.4, 147.1, 139.1, 135.2, 130.3 (q,  $J = 3.7$ ), 128.8, 128.5 (q,  $J = 31.9$ ), 125.3 (q,  $J = 3.8$ ), 124.5 (q,  $J = 272.3$ ), 0.0, -0.4.  $^{19}\text{F NMR}$  (376 MHz, Chloroform-*d*)  $\delta$  -62.35. **HRMS** (FI):  $m/z$  for  $\text{C}_{15}\text{H}_{23}\text{F}_3\text{O}_2$   $[\text{M}]^+$  calcd.: 316.1282, found: 316.1283.

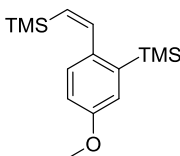

**3e:** 78.3 mg, 94% yield. Colorless oil.  $^1\text{H NMR}$  (400 MHz, Chloroform-*d*)  $\delta$  7.55 (d,  $J = 14.7$ , 1H), 7.14 (dd,  $J = 8.4$ , 0.7, 1H), 7.02 (d,  $J = 2.8$ , 1H), 6.81 (dd,  $J = 8.3$ , 2.8, 1H), 5.78 (d,  $J = 14.7$ , 1H), 3.80 (s, 3H), 0.28 (s, 9H), -0.07 (s, 9H).  $^{13}\text{C NMR}$  (101 MHz, Chloroform-*d*)  $\delta$  158.1, 148.1, 139.5, 139.3, 132.2, 129.9, 120.1, 112.5, 55.1, 0.1, -0.3. **HRMS** (FI):  $m/z$  for  $\text{C}_{15}\text{H}_{26}\text{OSi}_2$   $[\text{M}]^+$  calcd.: 278.1517, found: 278.1516.

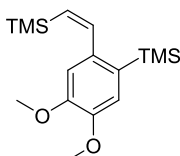

**3f:** 73.7 mg, 80% yield. White solid. **Melting point:** 41-43 °C.  $^1\text{H NMR}$  (400 MHz, Chloroform-*d*)  $\delta$  7.57 (d,  $J = 14.8$ , 1H), 6.97 (s, 1H), 6.79 (s, 1H), 5.81 (d,  $J = 14.8$ , 1H), 3.90 (s, 3H), 3.90 (s, 3H),

0.28 (s, 9H), -0.02 (s, 9H).  $^{13}\text{C}$  NMR (101 MHz, Chloroform-*d*)  $\delta$  148.8, 148.3, 147.2, 140.2, 132.2, 129.3, 116.6, 112.6, 55.8, 55.7, 0.1, -0.10. HRMS (FI):  $m/z$  for  $\text{C}_{16}\text{H}_{28}\text{O}_2\text{Si}_2$   $[\text{M}]^+$  calcd.: 308.1622, found: 308.1626.

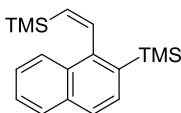

**3g**: 88.1 mg, 98% yield. Colorless oil.  $^1\text{H}$  NMR (400 MHz, Chloroform-*d*)  $\delta$  8.17 – 8.08 (m, 1H), 7.83 – 7.76 (m, 1H), 7.75 – 7.67 (m, 2H), 7.58 (d,  $J = 8.3$ , 1H), 7.49 – 7.38 (m, 2H), 6.25 (d,  $J = 15.4$ , 1H), 0.35 (s, 9H), -0.41 (s, 9H).  $^{13}\text{C}$  NMR (101 MHz, Chloroform-*d*)  $\delta$  145.5, 144.7, 136.9, 134.2, 133.6, 131.8, 130.0, 127.8, 126.7, 126.0, 125.8, 125.4, 0.3, -1.3. HRMS (FI):  $m/z$  for  $\text{C}_{18}\text{H}_{26}\text{Si}_2$   $[\text{M}]^+$  calcd.: 298.1568, found: 298.1569.

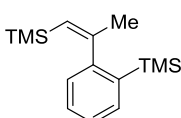

**3h**: 78.0 mg, 99% yield. Colorless oil.  $^1\text{H}$  NMR (400 MHz, Chloroform-*d*)  $\delta$  7.53 – 7.46 (m, 1H), 7.30 – 7.18 (m, 2H), 7.03 – 6.96 (m, 1H), 5.57 (q,  $J = 1.4$ , 1H), 2.13 (d,  $J = 1.4$ , 3H), 0.29 (s, 9H), -0.26 (s, 9H).  $^{13}\text{C}$  NMR (101 MHz, Chloroform-*d*)  $\delta$  156.8, 150.6, 136.7, 134.6, 128.4, 128.4, 128.3, 125.9, 31.8, 0.9, -0.4. HRMS (FI):  $m/z$  for  $\text{C}_{15}\text{H}_{26}\text{Si}_2$   $[\text{M}]^+$  calcd.: 262.1568, found: 262.1565.

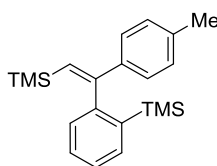

**3i**: 98% yield. Colorless oil.  $^1\text{H}$  NMR (400 MHz, Chloroform-*d*)  $\delta$  7.61 – 7.54 (m, 1H), 7.43 – 7.29 (m, 2H), 7.16 (m, 3H), 7.07 (d,  $J = 8.1$ , 2H), 6.35 (s, 1H), 2.33 (s, 3H), -0.01 (s, 9H), -0.16 (s, 9H).  $^{13}\text{C}$  NMR (101 MHz, Chloroform-*d*)  $\delta$  157.4, 148.0, 140.1, 138.6, 137.4, 134.7, 130.9, 128.7, 128.3, 128.0, 126.9, 126.4, 21.1, 0.3, -0.4. HRMS (FI):  $m/z$  for  $\text{C}_{21}\text{H}_{30}\text{Si}_2$   $[\text{M}]^+$  calcd.: 338.1881, found: 338.1886.



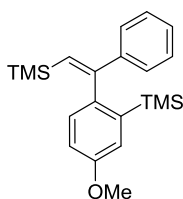

**3j**: 104.5 mg, 98% yield. Colorless oil.  $^1\text{H NMR}$  (400 MHz, Chloroform-*d*)  $\delta$  7.25 – 7.19 (m, 5H), 7.13 – 7.06 (m, 2H), 6.92 – 6.87 (m, 1H), 6.34 (s, 1H), 3.86 (s, 3H), -0.07 (s, 9H), -0.16 (s, 9H).  $^{13}\text{C NMR}$  (101 MHz, Chloroform-*d*)  $\delta$  158.0, 157.4, 143.3, 140.3, 140.2, 132.2, 129.7, 128.0, 127.5, 127.1, 121.1, 112.3, 55.1, 0.1, -0.3. **HRMS** (FI):  $m/z$  for  $\text{C}_{21}\text{H}_{30}\text{OSi}_2$   $[\text{M}]^+$  calcd.: 354.1830, found: 354.1834.

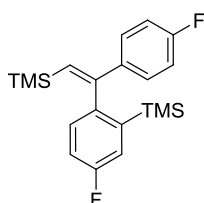

**3k**: 101.8 mg, 94% yield. Colorless oil.  $^1\text{H NMR}$  (400 MHz, Chloroform-*d*)  $\delta$  7.38 – 7.27 (m, 3H), 7.22 (dd,  $J = 8.3, 5.6$ , 1H), 7.15 (td,  $J = 8.3, 2.7$ , 1H), 7.04 (t,  $J = 8.7$ , 2H), 6.41 (s, 1H), 0.06 (s, 9H), -0.06 (s, 9H).  $^{13}\text{C NMR}$  (101 MHz, Chloroform-*d*)  $\delta$  162.5 (d,  $J = 247.9$ ), 161.8 (d,  $J = 248.0$ ), 155.4, 143.4 (d,  $J = 3.2$ ), 141.8 (d,  $J = 3.7$ ), 139.1 (d,  $J = 3.2$ ), 132.5 (d,  $J = 6.8$ ), 129.9 (d,  $J = 1.8$ ), 128.7 (d,  $J = 8.1$ ), 121.4 (d,  $J = 18.9$ ), 115.1 (d,  $J = 20.9$ ), 114.9 (d,  $J = 21.4$ ), 0.0, -0.4.  $^{19}\text{F NMR}$  (376 MHz, Chloroform-*d*)  $\delta$  -114.62 (tt,  $J = 8.7, 5.4$ ), -116.07 (td,  $J = 8.9, 5.5$ ). **HRMS** (FI):  $m/z$  for  $\text{C}_{20}\text{H}_{26}\text{F}_2\text{Si}_2$   $[\text{M}]^+$  calcd.: 360.1536, found: 360.1537.

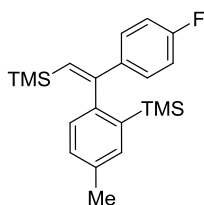

**3l**: 103.7 mg, 97% yield. Colorless oil.  $^1\text{H NMR}$  (400 MHz, Chloroform-*d*)  $\delta$  7.34 (d,  $J = 1.9$ , 1H), 7.23 – 7.15 (m, 3H), 7.03 (d,  $J = 7.7$ , 1H), 6.92 (t,  $J = 8.7$ , 2H), 6.26 (s, 1H), 2.39 (s, 3H), -0.05 (s, 9H), -0.18 (s, 9H).  $^{13}\text{C NMR}$  (101 MHz, Chloroform-*d*)  $\delta$  162.4 (d,  $J = 247.3$ ), 156.6, 144.7, 139.4 (d,  $J = 3.2$ ), 138.2, 135.8, 135.7, 130.9, 129.1, 129.1 (d,  $J = 1.8$ ), 128.7 (d,  $J = 8.0$ ), 114.8 (d,  $J = 21.3$ ), 21.4, 0.3, -0.4.  $^{19}\text{F NMR}$  (376 MHz, Chloroform-*d*)  $\delta$  -115.12 (tt,  $J = 8.6, 5.4$ ). **HRMS** (FI):  $m/z$  for  $\text{C}_{21}\text{H}_{29}\text{FSi}_2$   $[\text{M}]^+$  calcd.: 356.1786, found: 356.1784.

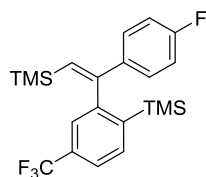

**3m**: 121.7 mg, 99% yield. Colorless oil.  $^1\text{H NMR}$  (400 MHz, Chloroform-*d*)  $\delta$  7.70 (d,  $J = 7.8$ , 1H), 7.65 – 7.54 (m, 1H), 7.42 (d,  $J = 1.9$ , 1H), 7.25 – 7.13 (m, 2H), 6.97 (t,  $J = 8.7$ , 2H), 6.38 (s, 1H), -0.00 (s, 9H), -0.17 (s, 9H).  $^{13}\text{C NMR}$  (101 MHz, Chloroform-*d*)  $\delta$  162.6 (d,  $J = 248.3$ ), 155.2, 148.3, 143.9 (q,  $J = 1.2$ ), 138.5 (d,  $J = 3.3$ ), 135.5, 130.6 (q,  $J = 32.3, 32.3, 32.3$ ), 130.5 (d,  $J = 1.8$ ), 128.7 (d,  $J = 8.1$ ), 127.2 (q,  $J = 3.7, 3.6, 3.6$ ), 124.1 (q,  $J = 272.4, 272.3, 272.3$ ), 123.1 (q,  $J = 3.8, 3.8, 3.8$ ), 115.1 (d,  $J = 21.5$ ), 0.0, -0.55.  $^{19}\text{F NMR}$  (376 MHz, Chloroform-*d*)  $\delta$  -62, -114.16 (tt,  $J = 8.7, 5.4$ ). **HRMS** (FI):  $m/z$  for  $\text{C}_{21}\text{H}_{26}\text{F}_4\text{Si}_2$   $[\text{M}]^+$  calcd.: 410.1504, found: 410.1498.

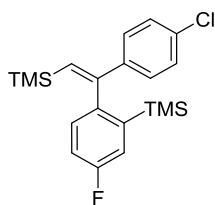

**3n**: 107.6 mg, 95% yield. Colorless oil.  $^1\text{H NMR}$  (400 MHz, Chloroform-*d*)  $\delta$  7.25 – 7.19 (m, 3H), 7.18 – 7.13 (m, 2H), 7.10 (dd,  $J = 8.3, 5.6$ , 1H), 7.05 (td,  $J = 8.4, 2.7$ , 1H), 6.37 (s, 1H), -0.03 (s, 9H), -0.17 (s, 9H).  $^{13}\text{C NMR}$  (101 MHz, Chloroform-*d*)  $\delta$  161.8 (d,  $J = 248.1$ ), 155.3, 143.1 (d,  $J = 3.4$ ), 141.9 (d,  $J = 3.6$ ), 141.2, 133.6, 132.6 (d,  $J = 6.7$ ), 130.8, 128.2, 128.2, 121.4 (d,  $J = 18.8$ ), 115.1 (d,  $J = 20.7$ ), 0.1, -0.45.  $^{19}\text{F NMR}$  (376 MHz, Chloroform-*d*)  $\delta$  -115.95 (td,  $J = 8.8, 5.5$ ). **HRMS** (FI):  $m/z$  for  $\text{C}_{20}\text{H}_{26}\text{ClF}\text{Si}_2$   $[\text{M}]^+$  calcd.: 376.1240, found: 376.1235.

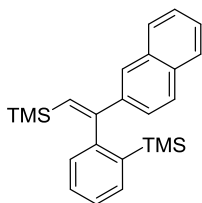

**3o**: 110.0 mg, 98% yield. Colorless oil.  $^1\text{H NMR}$  (400 MHz, Chloroform-*d*)  $\delta$  7.81 – 7.73 (m, 2H), 7.70 – 7.63 (m, 2H), 7.62 – 7.57 (m, 1H), 7.46 – 7.33 (m, 5H), 7.24 – 7.19 (m, 1H), 6.54 (s, 1H), -0.07 (s, 9H), -0.15 (s, 9H).  $^{13}\text{C NMR}$  (101 MHz, Chloroform-*d*)  $\delta$  157.3, 147.7, 139.9, 138.9, 134.8, 133.1, 132.8, 131.0, 129.9, 128.5, 128.5, 127.7, 127.4, 127.0, 126.6, 126.0, 126.0, 124.3, 0.4, -0.4. **HRMS** (FI):  $m/z$  for  $\text{C}_{24}\text{H}_{30}\text{Si}_2$   $[\text{M}]^+$  calcd.: 374.1881, found: 374.1887.

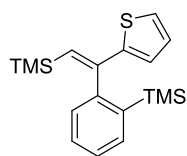

**3p:** 98.3 mg, 99% yield. Colorless oil.  $^1\text{H NMR}$  (400 MHz, Chloroform-*d*)  $\delta$  7.59 – 7.53 (m, 1H), 7.38 – 7.28 (m, 2H), 7.19 (dd,  $J = 5.1, 1.2$ , 1H), 7.18 – 7.11 (m, 1H), 6.85 (dd,  $J = 5.1, 3.6$ , 1H), 6.40 (dd,  $J = 3.6, 1.2$ , 1H), 6.20 (s, 1H), 0.08 (s, 9H), -0.19 (s, 9H).  $^{13}\text{C NMR}$  (101 MHz, Chloroform-*d*)  $\delta$  151.3, 149.8, 146.8, 138.9, 134.7, 130.0, 128.3, 127.8, 127.4, 126.8, 125.6, 0.5, -0.4. **HRMS** (FI):  $m/z$  for  $\text{C}_{18}\text{H}_{26}\text{SSi}_2$   $[\text{M}]^+$  calcd.: 330.1288, found: 330.1293.

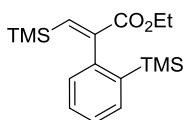

**3q:** 80.9 mg, 84% yield. Colorless oil.  $^1\text{H NMR}$  (400 MHz, Chloroform-*d*)  $\delta$  7.56 – 7.48 (m, 1H), 7.32 – 7.27 (m, 2H), 7.24 (s, 1H), 7.06 – 6.97 (m, 1H), 4.27 – 4.07 (m, 2H), 1.22 (t,  $J = 7.1, 7.1$ , 3H), 0.19 (s, 9H), -0.19 (s, 9H).  $^{13}\text{C NMR}$  (101 MHz, Chloroform-*d*)  $\delta$  167.0, 149.2, 145.2, 144.0, 138.6, 134.3, 130.0, 128.2, 126.7, 61.1, 14.2, 0.5, -1.1. **HRMS** (FI):  $m/z$  for  $\text{C}_{17}\text{H}_{28}\text{O}_2\text{Si}_2$   $[\text{M}]^+$  calcd.: 320.1622, found: 320.1624.

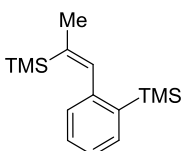

**3r:** 64.7 mg, 82% yield. Colorless oil.  $^1\text{H NMR}$  (400 MHz, Chloroform-*d*)  $\delta$  7.45 (dd,  $J = 7.0, 1.7$ , 1H), 7.29 (s, 1H), 7.28 – 7.22 (m, 1H), 7.21 (td,  $J = 7.3, 1.6$ , 1H), 7.08 (d,  $J = 7.0$ , 1H), 1.95 (d,  $J = 1.7$ , 3H), 0.26 (s, 9H), -0.16 (s, 9H).  $^{13}\text{C NMR}$  (101 MHz, Chloroform-*d*)  $\delta$  146.9, 143.2, 139.6, 137.7, 133.7, 129.3, 128.4, 126.0, 24.5, -0.2, -0.6. **HRMS** (FI):  $m/z$  for  $\text{C}_{15}\text{H}_{26}\text{Si}_2$   $[\text{M}]^+$  calcd.: 262.1568, found: 262.1563.

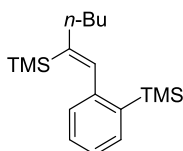

**3s**: 64.1 mg, 70% yield. Colorless oil.  $^1\text{H NMR}$  (400 MHz, Chloroform-*d*)  $\delta$  7.46 (dd,  $J = 7.3, 1.6$ , 1H), 7.30 (s, 1H), 7.26 (td,  $J = 7.4, 1.7$ , 1H), 7.21 (td,  $J = 7.3, 1.5$ , 1H), 7.12 (d,  $J = 7.1$ , 1H), 2.26 (m, 2H), 1.53 – 1.34 (m, 4H), 0.95 (t,  $J = 7.2$ , 3H), 0.26 (s, 9H), -0.15 (s, 9H).  $^{13}\text{C NMR}$  (101 MHz, Chloroform-*d*)  $\delta$  147.2, 144.2, 143.1, 137.7, 133.7, 129.3, 128.4, 126.0, 38.2, 32.4, 22.7, 14.0, 0.2, -0.2. **HRMS** (FI):  $m/z$  for  $\text{C}_{18}\text{H}_{32}\text{Si}_2$   $[\text{M}]^+$  calcd.: 304.2037, found: 304,2035.

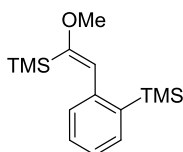

**3t**: 80.4 mg, 96% yield. Colorless oil.  $^1\text{H NMR}$  (400 MHz, Chloroform-*d*)  $\delta$  7.47 (dd,  $J = 7.1, 1.9$ , 1H), 7.30 – 7.17 (m, 2H), 7.11 (d,  $J = 7.3$ , 1H), 6.54 (s, 1H), 3.64 (s, 3H), 0.29 (s, 9H), -0.12 (s, 9H).  $^{13}\text{C NMR}$  (101 MHz, Chloroform-*d*)  $\delta$  164.3, 143.8, 139.1, 133.8, 130.7, 128.5, 125.8, 115.3, 54.6, -0.1, -1.1. **HRMS** (FI):  $m/z$  for  $\text{C}_{15}\text{H}_{26}\text{OSi}_2$   $[\text{M}]^+$  calcd.: 278.1517, found: 278.1512.

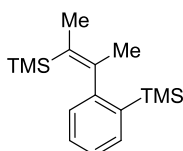

**3u**: 76.4 mg, 92% yield. Colorless oil.  $^1\text{H NMR}$  (400 MHz, Chloroform-*d*)  $\delta$  7.52 – 7.45 (m, 1H), 7.27 – 7.18 (m, 2H), 6.97 – 6.90 (m, 1H), 1.95 (q,  $J = 1.1$ , 3H), 1.77 (q,  $J = 1.1$ , 3H), 0.23 (s, 9H), -0.31 (s, 9H).  $^{13}\text{C NMR}$  (101 MHz, Chloroform-*d*)  $\delta$  153.0, 148.2, 137.2, 134.6, 131.4, 128.8, 128.3, 125.6, 23.9, 17.5, 0.7, -0.7. **HRMS** (FI):  $m/z$  for  $\text{C}_{16}\text{H}_{28}\text{Si}_2$   $[\text{M}]^+$  calcd.: 276.1724, found: 276.1721.

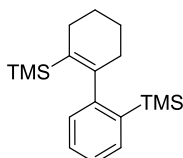

**3v**: 74.4 mg, 82% yield. Colorless oil.  $^1\text{H NMR}$  (400 MHz, Chloroform-*d*)  $\delta$  7.48 (dd,  $J = 7.2, 1.8$ , 1H), 7.27 – 7.18 (m, 2H), 6.95 (dd,  $J = 7.0, 1.7$ , 1H), 2.28 – 2.05 (m, 4H), 1.81 – 1.73 (m, 2H), 1.73 – 1.61 (m, 1H), 1.58 – 1.51 (m, 1H), 0.27 (s, 9H), -0.32 (s, 9H).  $^{13}\text{C NMR}$  (101 MHz, Chloroform-*d*)  $\delta$

152.2, 149.6, 137.5, 134.7, 133.0, 129.2, 128.3, 125.6, 35.5, 28.3, 23.0, 22.6, 1.0, -0.9. **HRMS** (FI):  $m/z$  for  $C_{18}H_{30}Si_2 [M]^+$  calcd.: 302.1881, found: 302.1877.

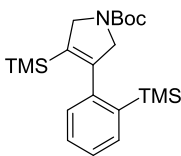

**3w**: 105.3 mg, 90% yield. Colorless oil.  **$^1H$  NMR** (400 MHz, Chloroform-*d*)  $\delta$  7.56 – 7.50 (m, 1H), 7.33 – 7.27 (m, 2H), 7.09 – 7.01 (m, 1H), 4.46 – 4.16 (m, 4H), 1.54 – 1.44 (m, 9H), 0.25 (s, 9H), -0.15 (s, 9H).  **$^{13}C$  NMR** (101 MHz, Chloroform-*d*)  $\delta$  154.2, 154.0, 149.8, 149.6, 142.5, 138.3, 138.2, 134.8, 134.7, 134.4, 134.3, 129.0, 128.5, 128.5, 126.8, 79.4, 79.3, 61.2, 61.0, 58.21, 58.19, 28.6, 28.5, 0.7, 0.6, -1.2, -1.3. **HRMS** (FI):  $m/z$  for  $C_{21}H_{35}O_2NSi_2 [M]^+$  calcd.: 389.2201, found: 389.2204.

## 5. Synthetic Transformations of the Disilylated Product **3a**

### 5.1 Vinyl Halogenation Reaction

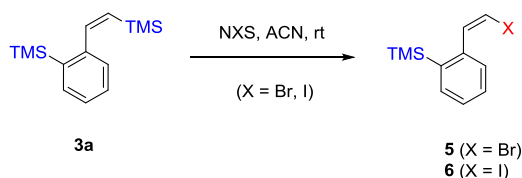

To the solution of NXS (0.3 mmol, 1 equiv.) in 2 mL  $CH_3CN$  at rt (20 °C) was added **3a** (0.3 mmol, 1 equiv., 74.6 mg, 84  $\mu$ L). After stirring at rt for 6 h, the reaction mixture was poured into water and extracted with petroleum ether. The combined extract was dried over  $Na_2SO_4$ , concentrated in *vacuo* and purified by flash column chromatography (petroleum ether) to give the product **5/6**.

**5**: 72.5 mg, 95% yield, colorless oil.  **$^1H$  NMR** (400 MHz, Chloroform-*d*)  $\delta$  7.55 (d,  $J = 7.3$ , 2H), 7.38 (td,  $J = 7.5$ , 1.5, 1H), 7.34 – 7.27 (m, 2H), 6.52 (d,  $J = 7.8$ , 1H), 0.30 (s, 9H).  **$^{13}C$  NMR** (101 MHz, Chloroform-*d*)  $\delta$  141.1, 138.8, 134.9, 134.3, 128.9, 128.7, 127.1, 108.6, -0.3. **HRMS** (FI):  $m/z$  for  $C_{11}H_{15}BrSi [M]^+$  calcd.: 254.0121, found: 254.0125.

**6**: 78.1 mg, 86% yield, colorless oil.  $^1\text{H NMR}$  (400 MHz, Chloroform-*d*)  $\delta$  7.55 (d,  $J$  = 6.9, 1H), 7.50 (d,  $J$  = 8.2, 1H), 7.45 – 7.34 (m, 2H), 7.31 (td,  $J$  = 7.2, 1.8, 1H), 6.66 (d,  $J$  = 8.3, 1H), 0.29 (s, 9H).  $^{13}\text{C NMR}$  (101 MHz, Chloroform-*d*)  $\delta$  144.0, 141.6, 138.4, 134.3, 128.8, 128.5, 127.2, 83.8, -0.3. **HRMS** (FI):  $m/z$  for  $\text{C}_{11}\text{H}_{15}\text{Si}$   $[\text{M}]^+$  calcd.: 301.9982, found: 301.9980.

## 5.2 Acylation of **3a**

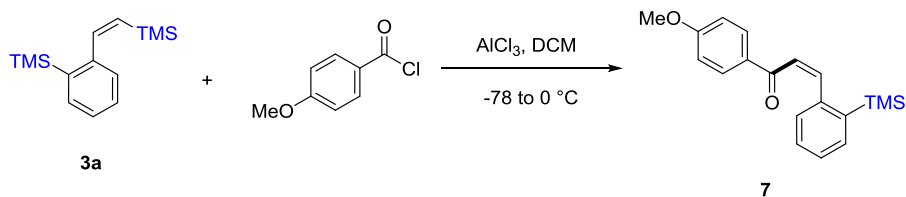

To the solution of 4-methoxybenzoyl chloride (0.33 mmol, 56.3 mg, 45  $\mu\text{L}$ , 1.1 equiv.) in DCM (0.6 mL) at  $-78$  °C under argon was added  $\text{AlCl}_3$  (0.36 mmol, 48 mg, 1.2 equiv.), then a solution of **3a** (0.3 mmol, 1 equiv., 74.6 mg, 84  $\mu\text{L}$ ) in 0.4 mL DCM was added slowly into the mixture. The reaction mixture was stirred at  $-78$  °C for 1 h and then the temperature was slowly elevated to  $0$  °C in 20 min. After cooling to  $-78$  °C, a solution of  $\text{Et}_3\text{N}$  and MeOH in DCM was added slowly to quench the reaction. A solution of oxalic acid in water was added followed by extraction with EtOAc. The combined extract was dried over  $\text{Na}_2\text{SO}_4$ , concentrated in *vacuo* and purified by flash column chromatography (petroleum ether/EtOAc 15 : 1) to give the product **7** (74.7 mg, 80% yield) as a yellowish oil. This product is rather unstable and will be transformed into the more stable *trans*-isomer under common experimental operation.

$^1\text{H NMR}$  (400 MHz, Chloroform-*d*)  $\delta$  7.87 (d,  $J$  = 8.9, 2H), 7.48 (dd,  $J$  = 7.3, 1.6, 1H), 7.32 (d,  $J$  = 12.5, 1H), 7.25 – 7.06 (m, 3H), 6.82 (d,  $J$  = 8.9, 2H), 6.64 (d,  $J$  = 12.5, 1H), 3.81 (s, 3H), 0.38 (s, 9H).  $^{13}\text{C NMR}$  (101 MHz, Chloroform-*d*)  $\delta$  193.1, 163.4, 141.6, 140.5, 138.4, 134.1, 131.2, 130.2, 129.3, 128.7, 127.32, 127.31, 113.6, 55.4, -0.0. **HRMS** (FI):  $m/z$  for  $\text{C}_{19}\text{H}_{22}\text{O}_2\text{Si}$   $[\text{M}]^+$  calcd.: 310.1384, found: 310.1381.

### 5.3 Substitution Reaction of 3a with Ethyl Glyoxylate

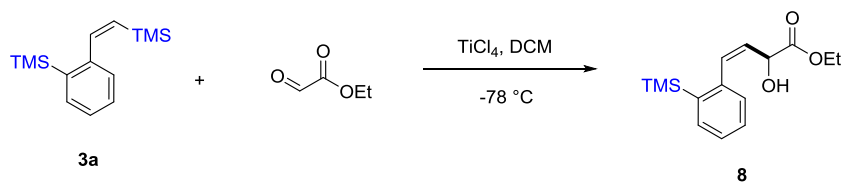

According to the reported procedure,<sup>2</sup> to the solution of ethyl glyoxylate (50% in toluene, 0.33 mmol, 67.4 mg, 1.1 equiv.) in DCM (0.4 mL) at -78 °C under argon was added a solution of TiCl<sub>4</sub> (0.36 mmol, 68.3 mg, 39.5 μL, 1.2 equiv.) in 0.4 mL DCM, then a solution of **3a** (0.3 mmol, 1 equiv., 74.6 mg, 84 μL) in 0.4 mL DCM was added slowly into the mixture. The reaction mixture was stirred at -78 °C for 1 h and then a solution of Et<sub>3</sub>N and MeOH in DCM was added slowly to quench the reaction. A solution of oxalic acid in water was added followed by extraction with EtOAc. The combined extract was dried over Na<sub>2</sub>SO<sub>4</sub>, concentrated in *vacuo* and purified by flash column chromatography (petroleum ether/EtOAc 5 : 1) to give the product **8** (70.0 mg, 84% yield) as a colorless oil.

<sup>1</sup>H NMR (400 MHz, Chloroform-*d*) δ 7.55 (dd, *J* = 7.2, 1.5, 1H), 7.45 (d, *J* = 7.5, 1H), 7.36 (td, *J* = 7.5, 1.5, 1H), 7.28 (td, *J* = 7.4, 1.4, 1H), 7.04 (d, *J* = 11.2, 1H), 5.66 (dd, *J* = 11.2, 9.9, 1H), 4.84 (dd, *J* = 10.0, 5.1, 1H), 4.25 (q, *J* = 7.2, 2H), 3.01 (d, *J* = 5.2, 1H), 1.29 (t, *J* = 7.2, 3H), 0.32 (s, 9H). <sup>13</sup>C NMR (101 MHz, Chloroform-*d*) δ 174.2, 141.4, 139.0, 136.6, 134.3, 129.4, 128.8, 127.2, 126.9, 67.3, 62.2, 14.1, -0.3. HRMS (FI): *m/z* for C<sub>15</sub>H<sub>22</sub>O<sub>3</sub>Si [M]<sup>+</sup> calcd.: 278.1333, found: 278.1332.

## 6. The Influence of the Equivalent of 2-Pyridone Ligand on the Formation of Aryl-Vinyl-Palladacycle Species

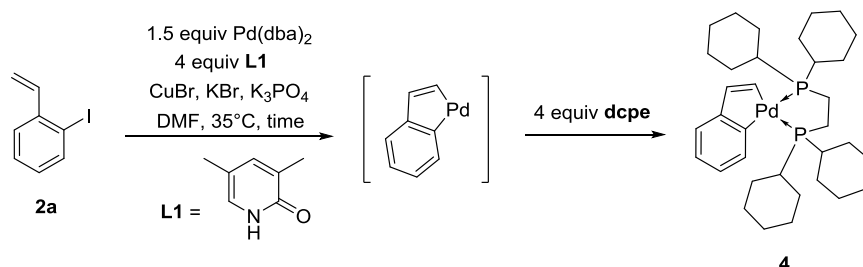

Synthesis and characterization of the Aryl-Vinyl-Palladacycle complex **4** have been reported.<sup>1c</sup>

Table S6

| entry | time  | variation         | <b>4</b> (%) <sup>a</sup> |
|-------|-------|-------------------|---------------------------|
| 1     | 5 s   | --                | 0                         |
| 2     | 25 s  | --                | 4                         |
| 3     | 50 s  | --                | 7                         |
| 4     | 80 s  | --                | 7                         |
| 5     | 2 min | --                | 9                         |
| 6     | 4 min | --                | 9                         |
| 7     | 2 min | without <b>L1</b> | 0                         |
| 8     | 25s   | CuBr, KBr         | 12                        |
| 9     | 50s   | CuBr, KBr         | 13                        |
| 10    | 2 min | CuBr, KBr         | 15                        |
| 11    | 4 min | CuBr, KBr         | 17                        |

<sup>a</sup>Determined by <sup>31</sup>P NMR using Ph<sub>3</sub>PO as an internal standard.

For in situ Capturing of Aryl-Vinyl-Palladacycle species:

To a 5 mL sealed tube charged with a stir bar was added a mixture of Pd(dba)<sub>2</sub> (2.2 mg, 3.75 μmol), 3,5-dimethylpyridin-2(1H)-one (**L1**) (1.2 mg, 10 μmol), K<sub>3</sub>PO<sub>4</sub> (21.2 mg, 0.1 mmol), and a ground mixture of CuBr and KBr (12.2 mg, containing 2.0 μmol CuBr and 0.1 mmol KBr). The tube was capped with a Teflon thread plug, and then degassed and backfilled with argon (this procedure was repeated three times). DMF (0.6 mL) was added and the mixture was stirred at 35°C for 30 s. Then a DMF solution of *ortho*-iodophenylethylene (10.2 μL, containing 2.5 μmol solute) was added and,



---

after stirring for 50s, a freshly prepared CH<sub>2</sub>Cl<sub>2</sub> solution of 1,2-bis(dicyclohexylphosphino)ethane (**dcpe**) (80 μL, containing 4.2 mg, 10 μmol **dcpe**) was added, followed with a DMF solution of Ph<sub>3</sub>PO (12.5 μL, containing 2.95 μmol solute) as internal standard. The resulting mixture was transferred to an NMR tube under argon and submitted to NMR analysis.

## 7. References

- 1 (a) T.-J. Hu, G. Zhang, Y.-H. Chen, C.-G. Feng and G.-Q. Lin, *J. Am. Chem. Soc.*, 2016, **138**, 2897; (b) M.-Y. Li, P. Han, T.-J. Hu, D. Wei, G. Zhang, A. Qin, C.-G. Feng, B. Z. Tang and G.-Q. Lin, *iScience*, 2020, **23**, 100966; (c) B.-B. Zhu, W.-B. Ye, Z.-T. He, S.-S. Zhang, C.-G. Feng and G.-Q. Lin, *ACS Catal.*, 2021, **11**, 12123.
- 2 K. Mikami, H. Wakabayashi and T. Nakai, *J. Org. Chem.*, 1991, **56**, 4337.

# 8. NMR Spectra

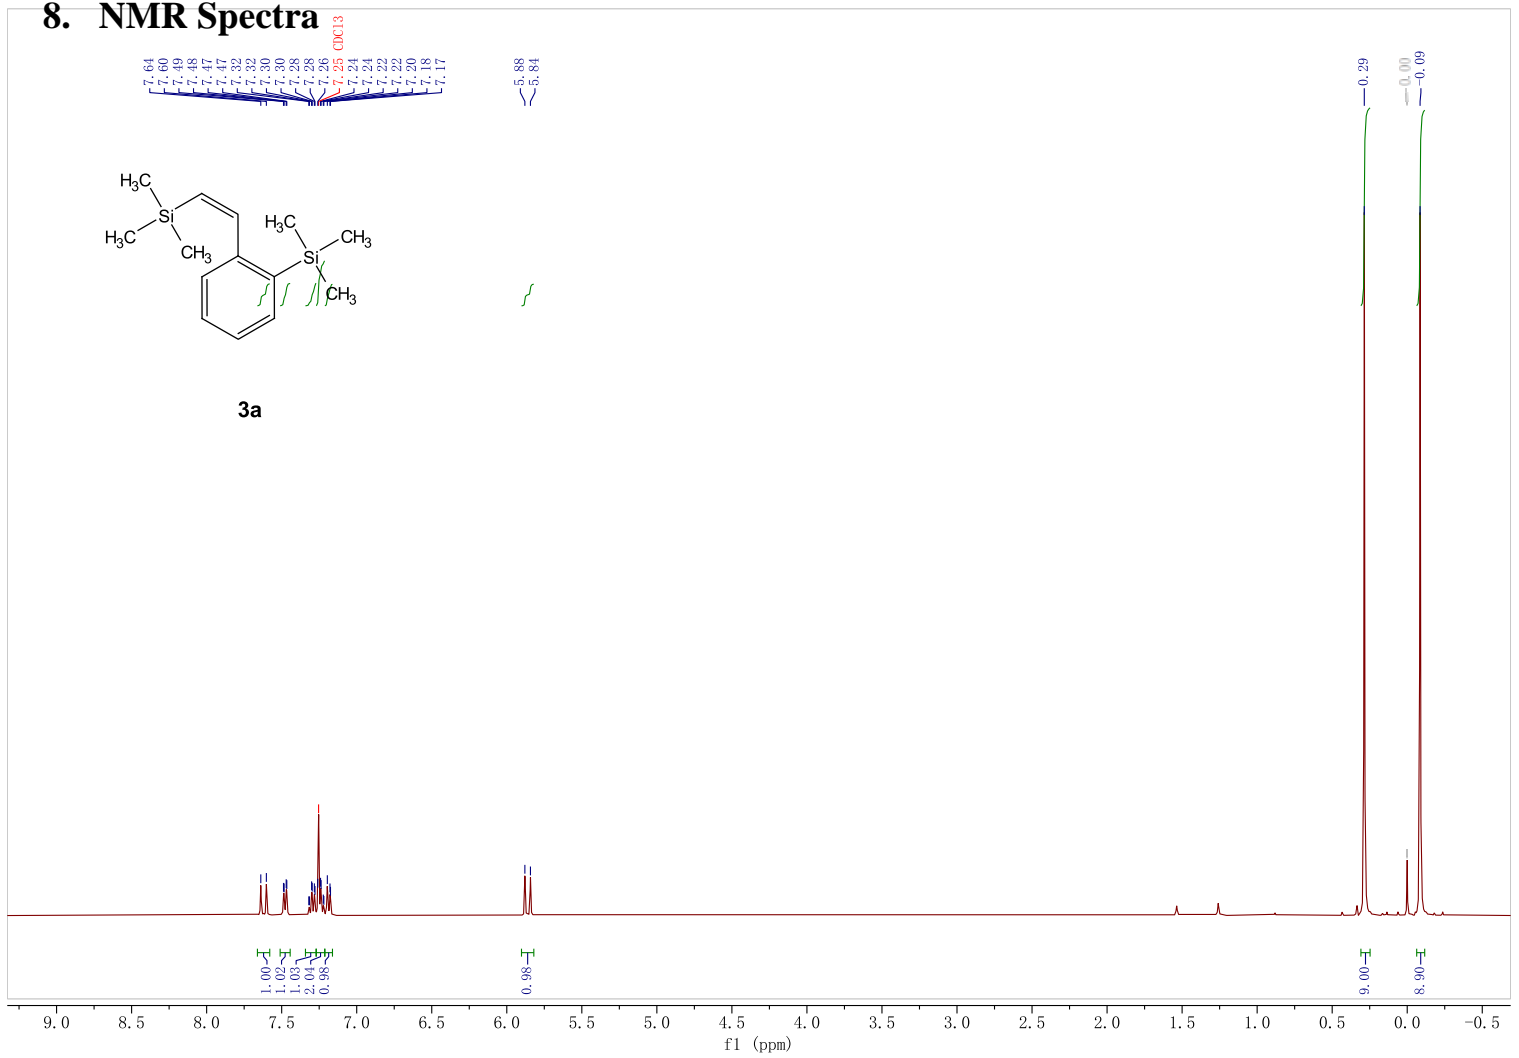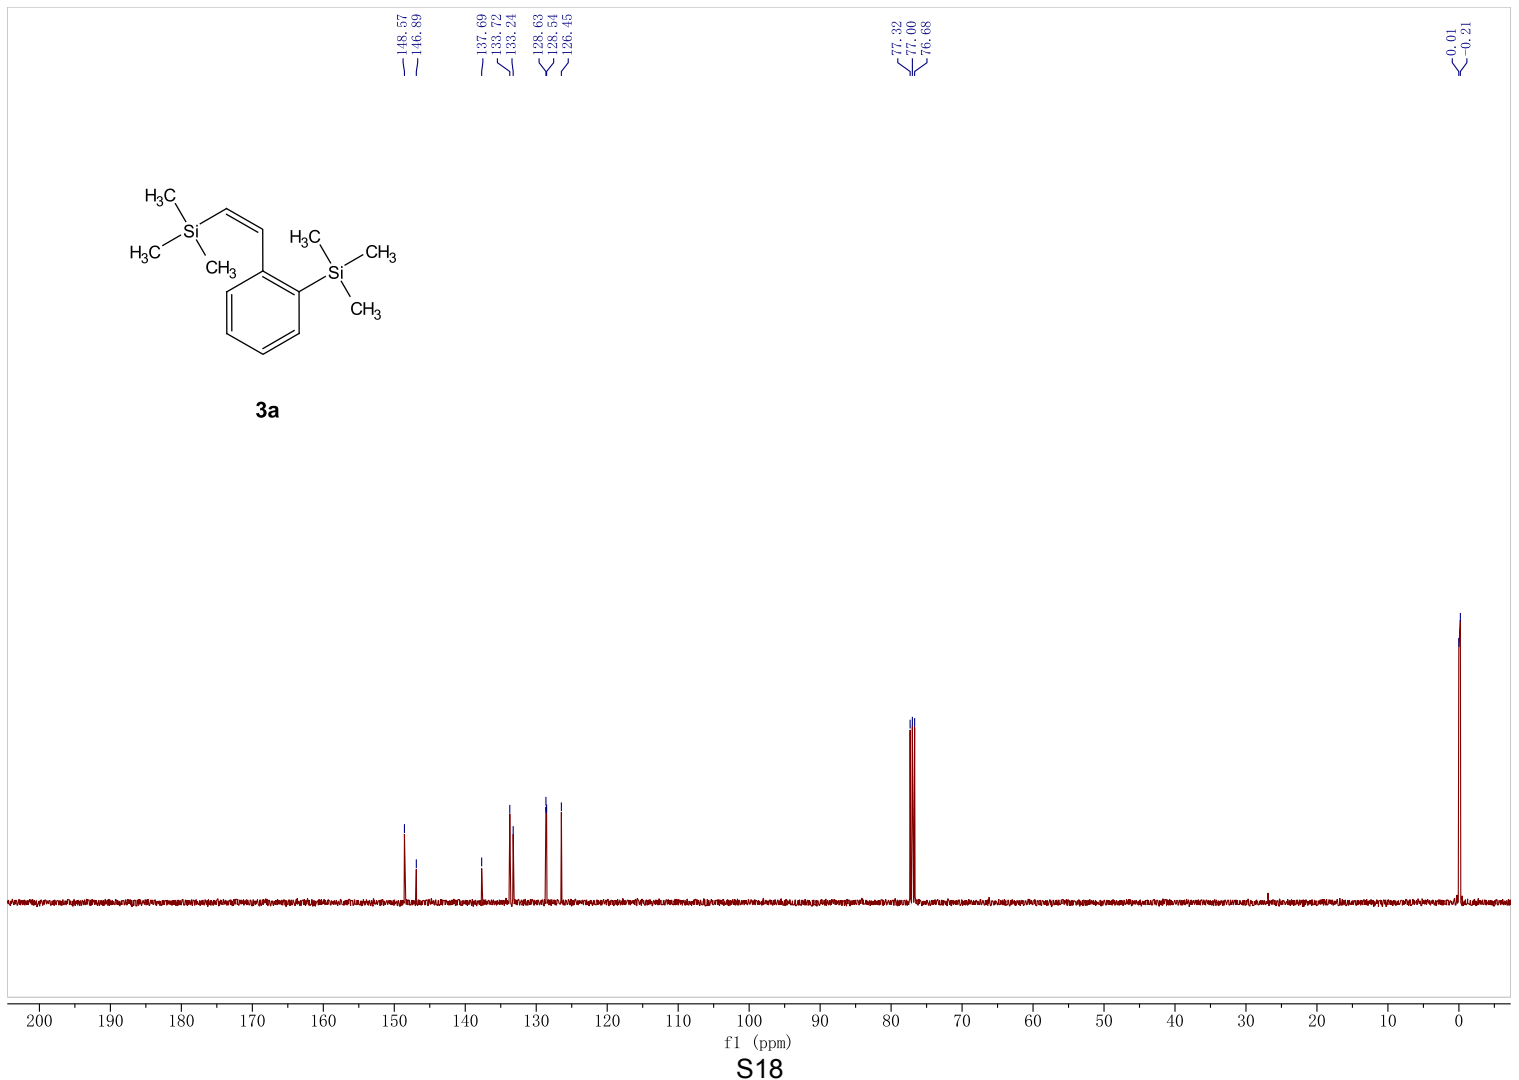

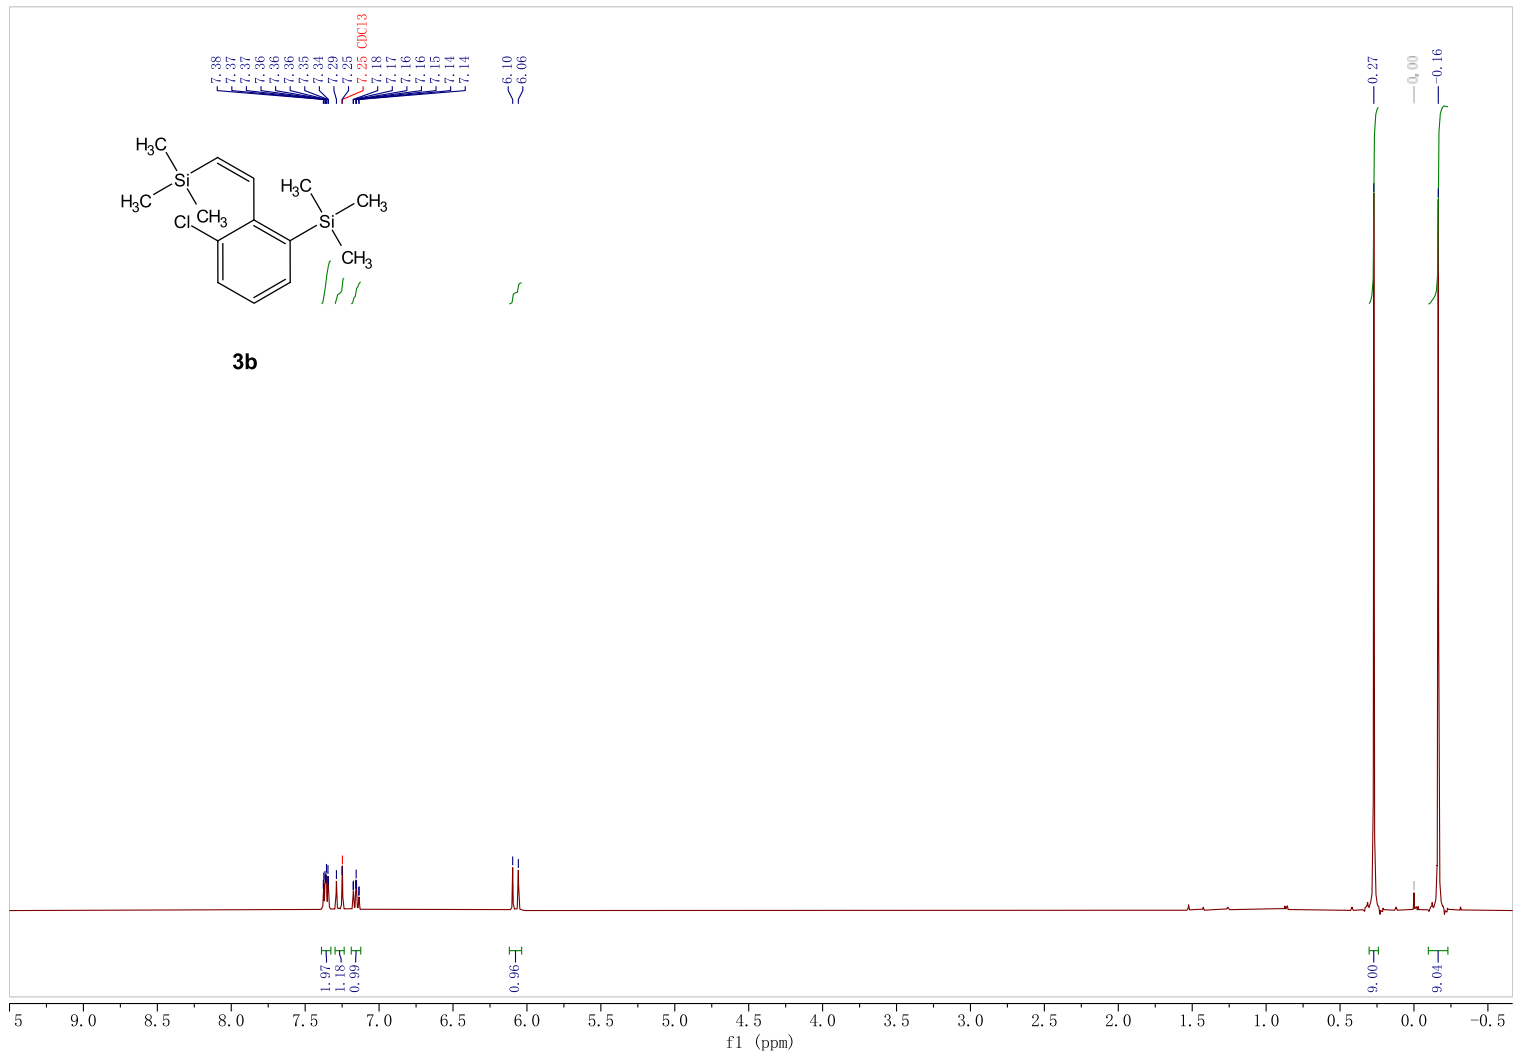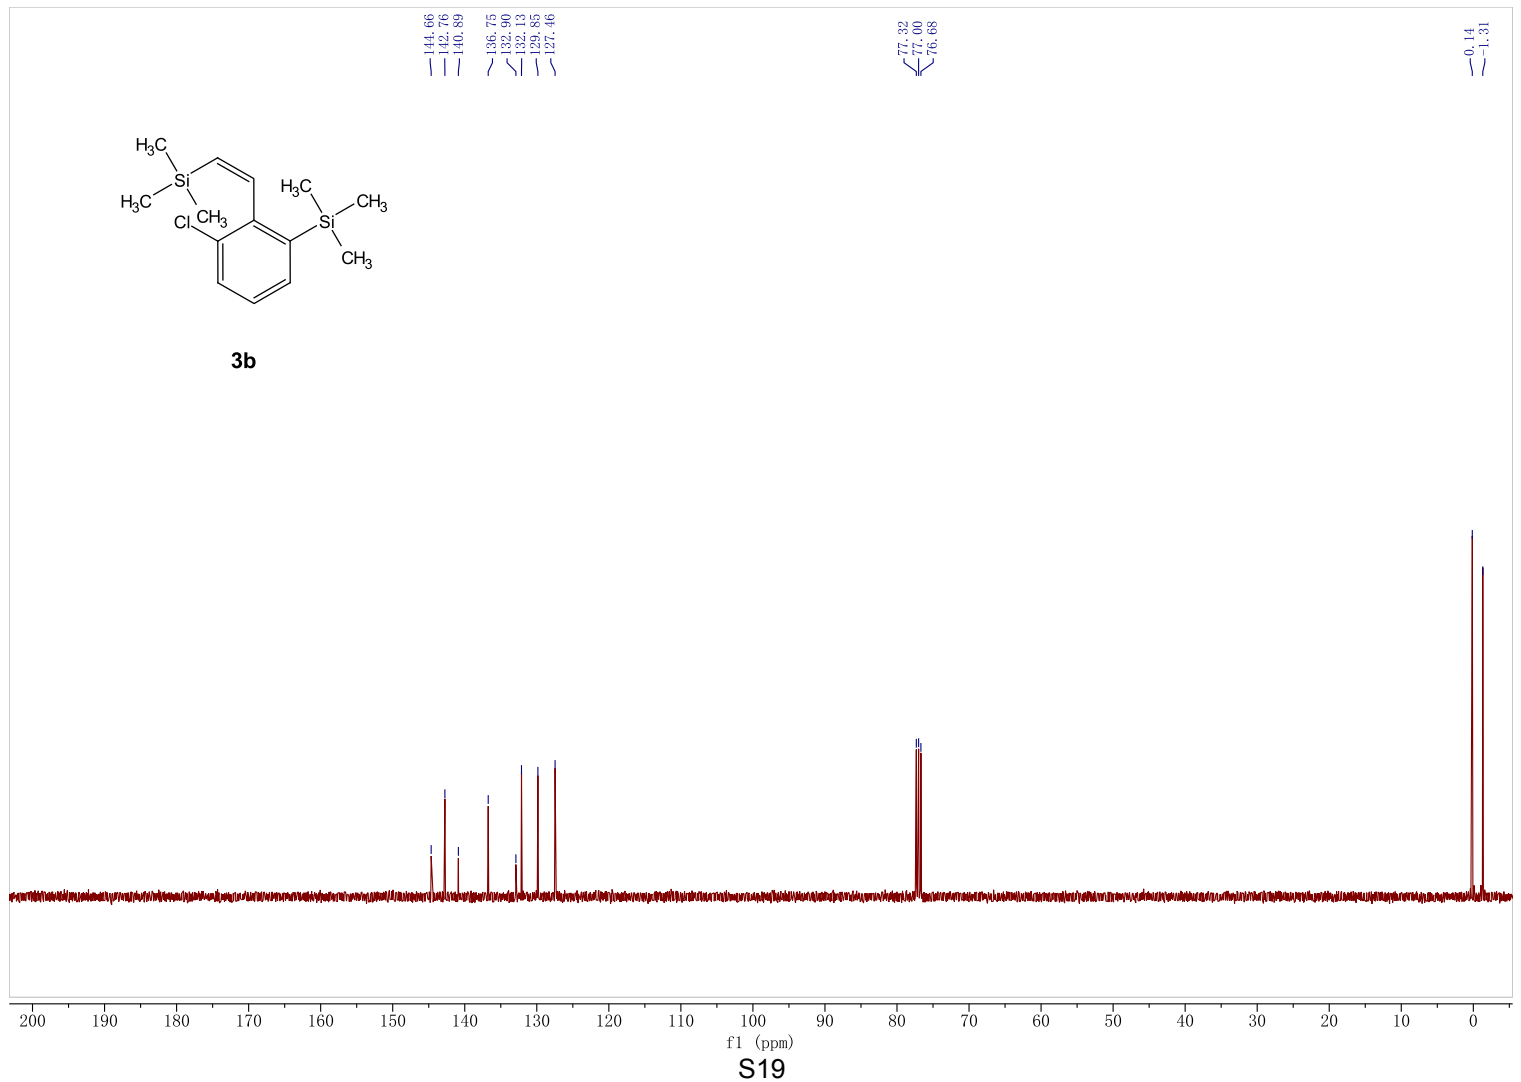

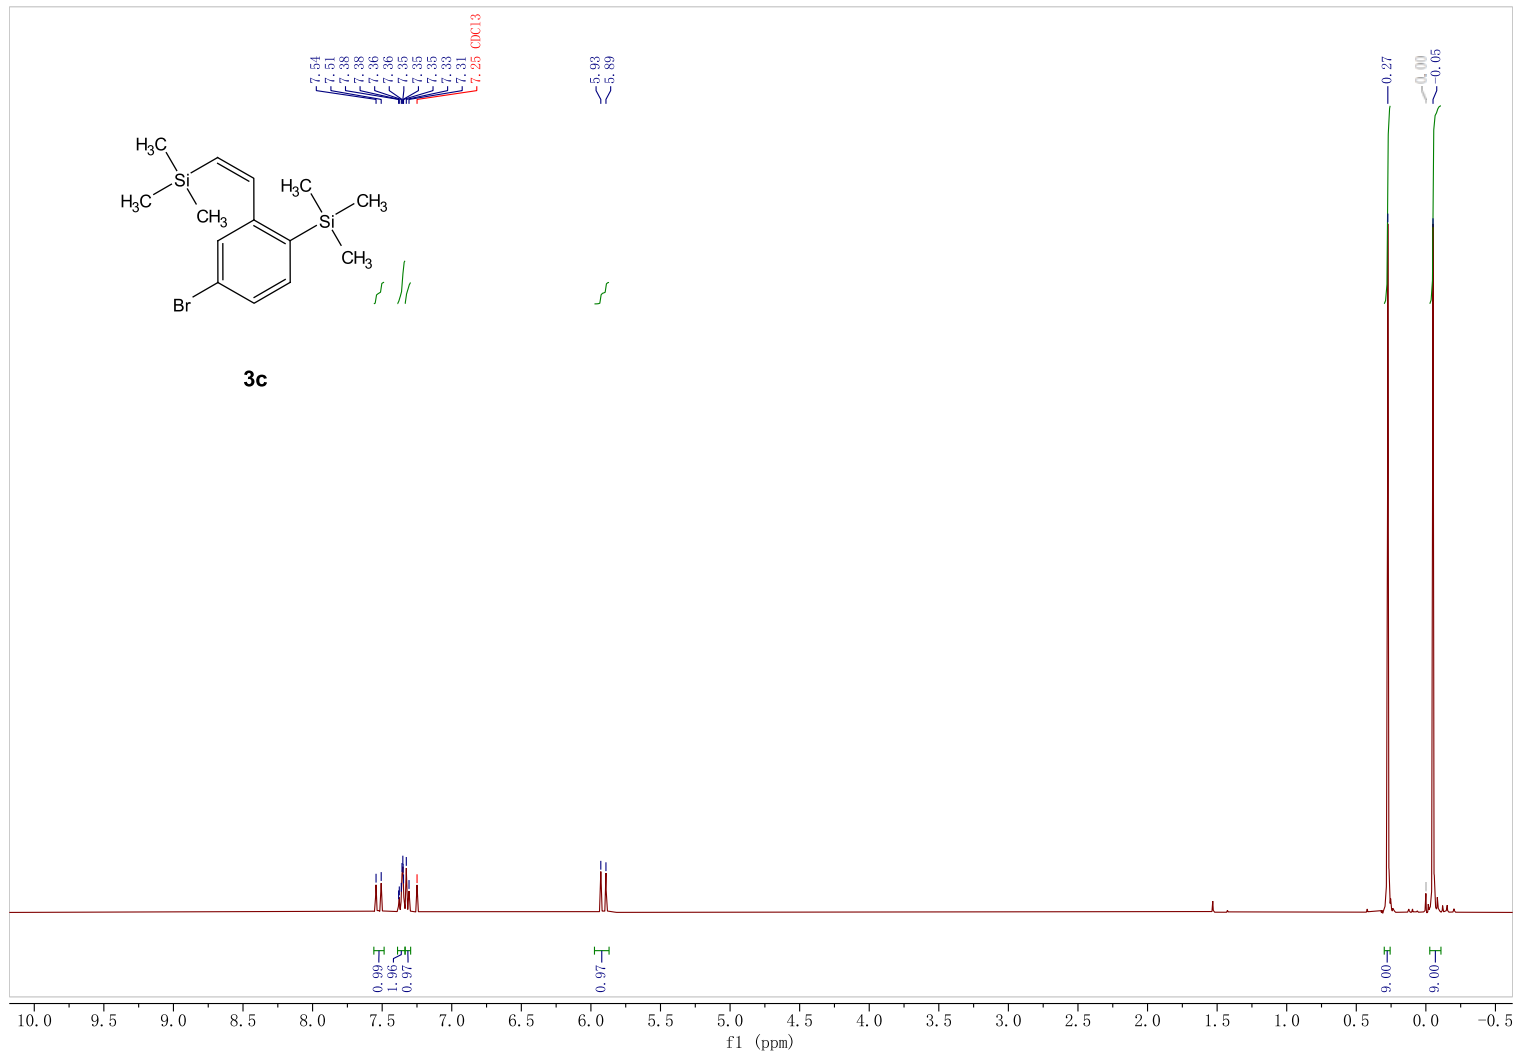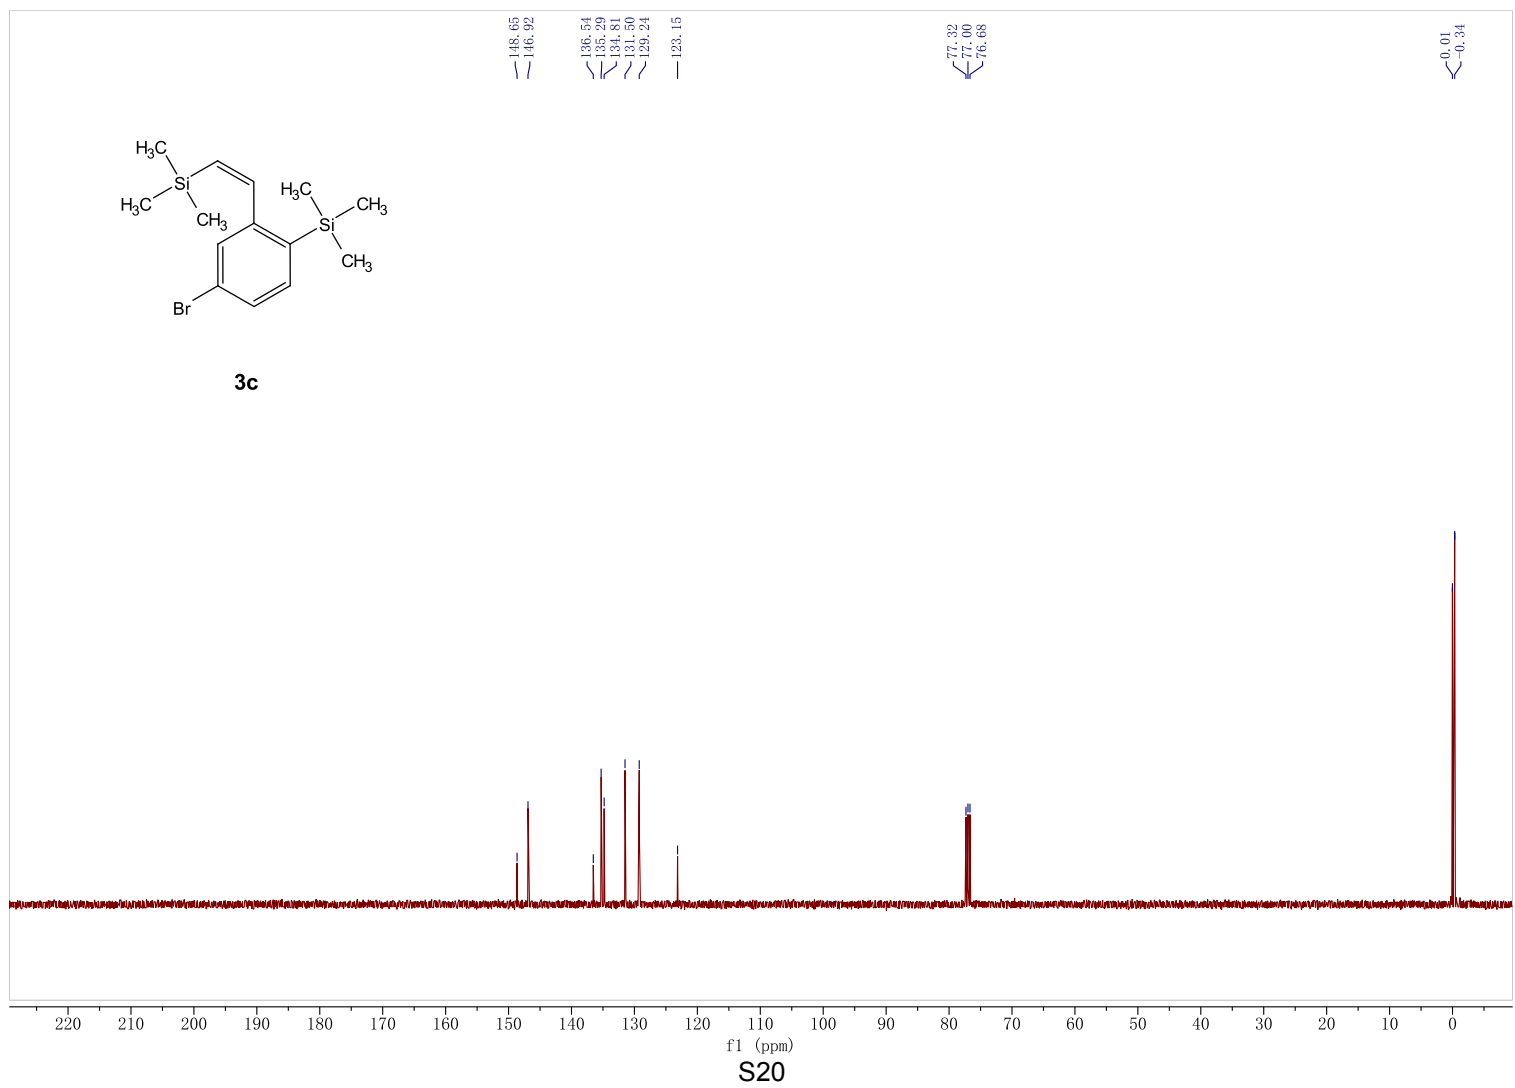

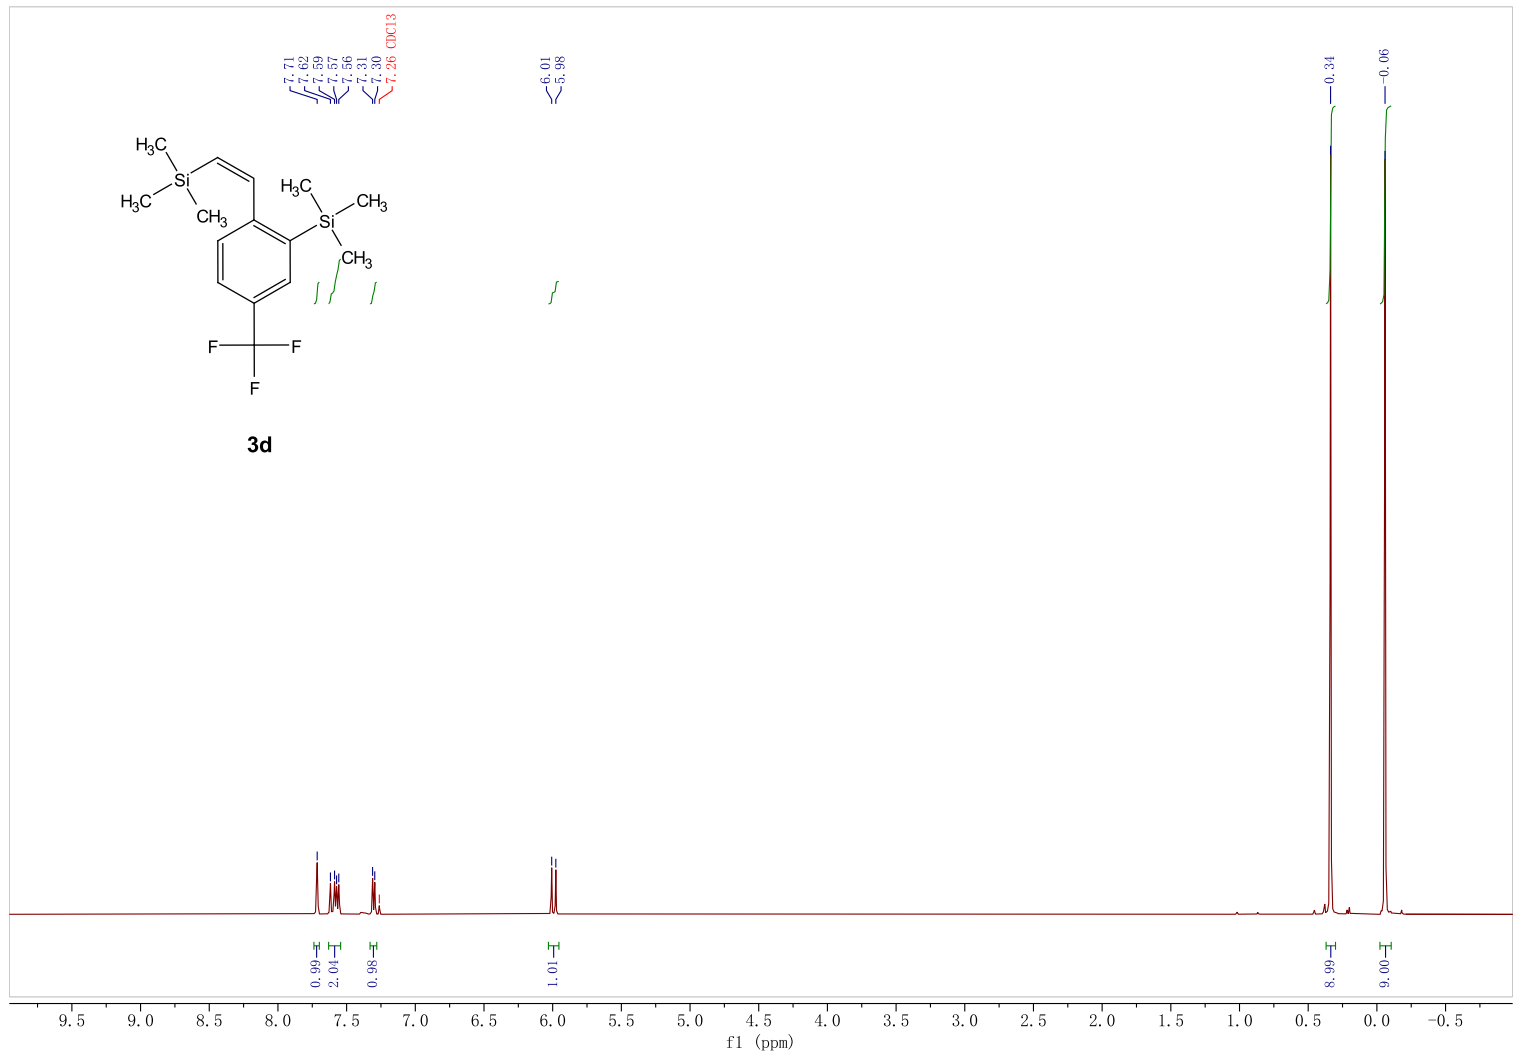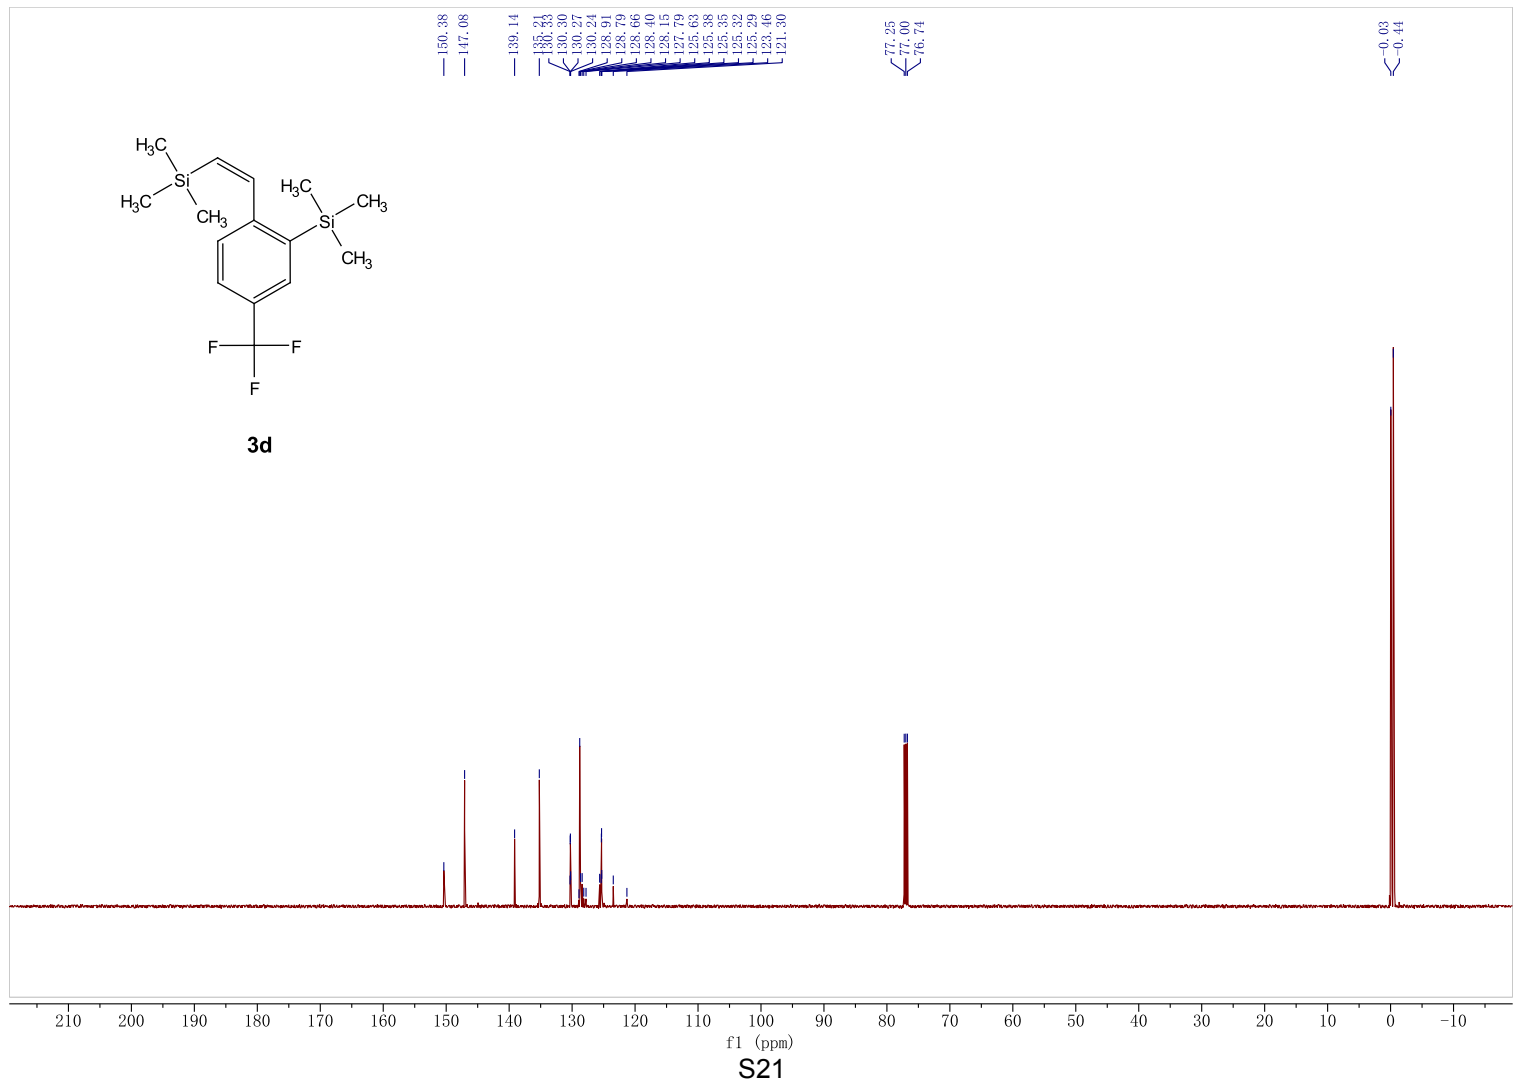

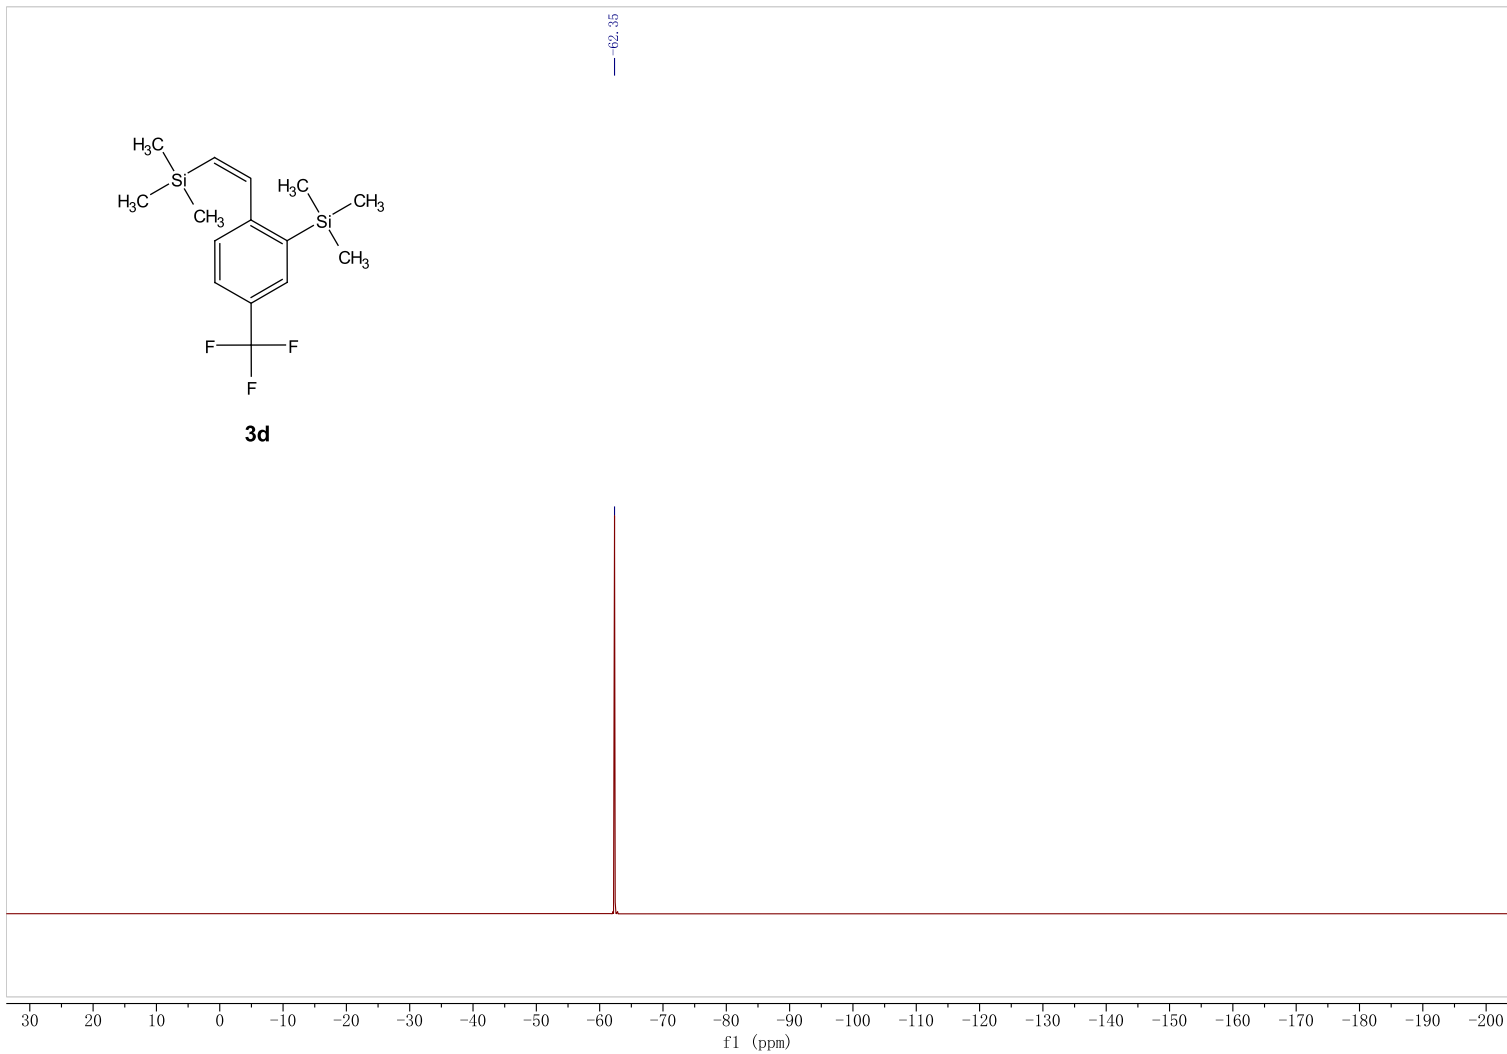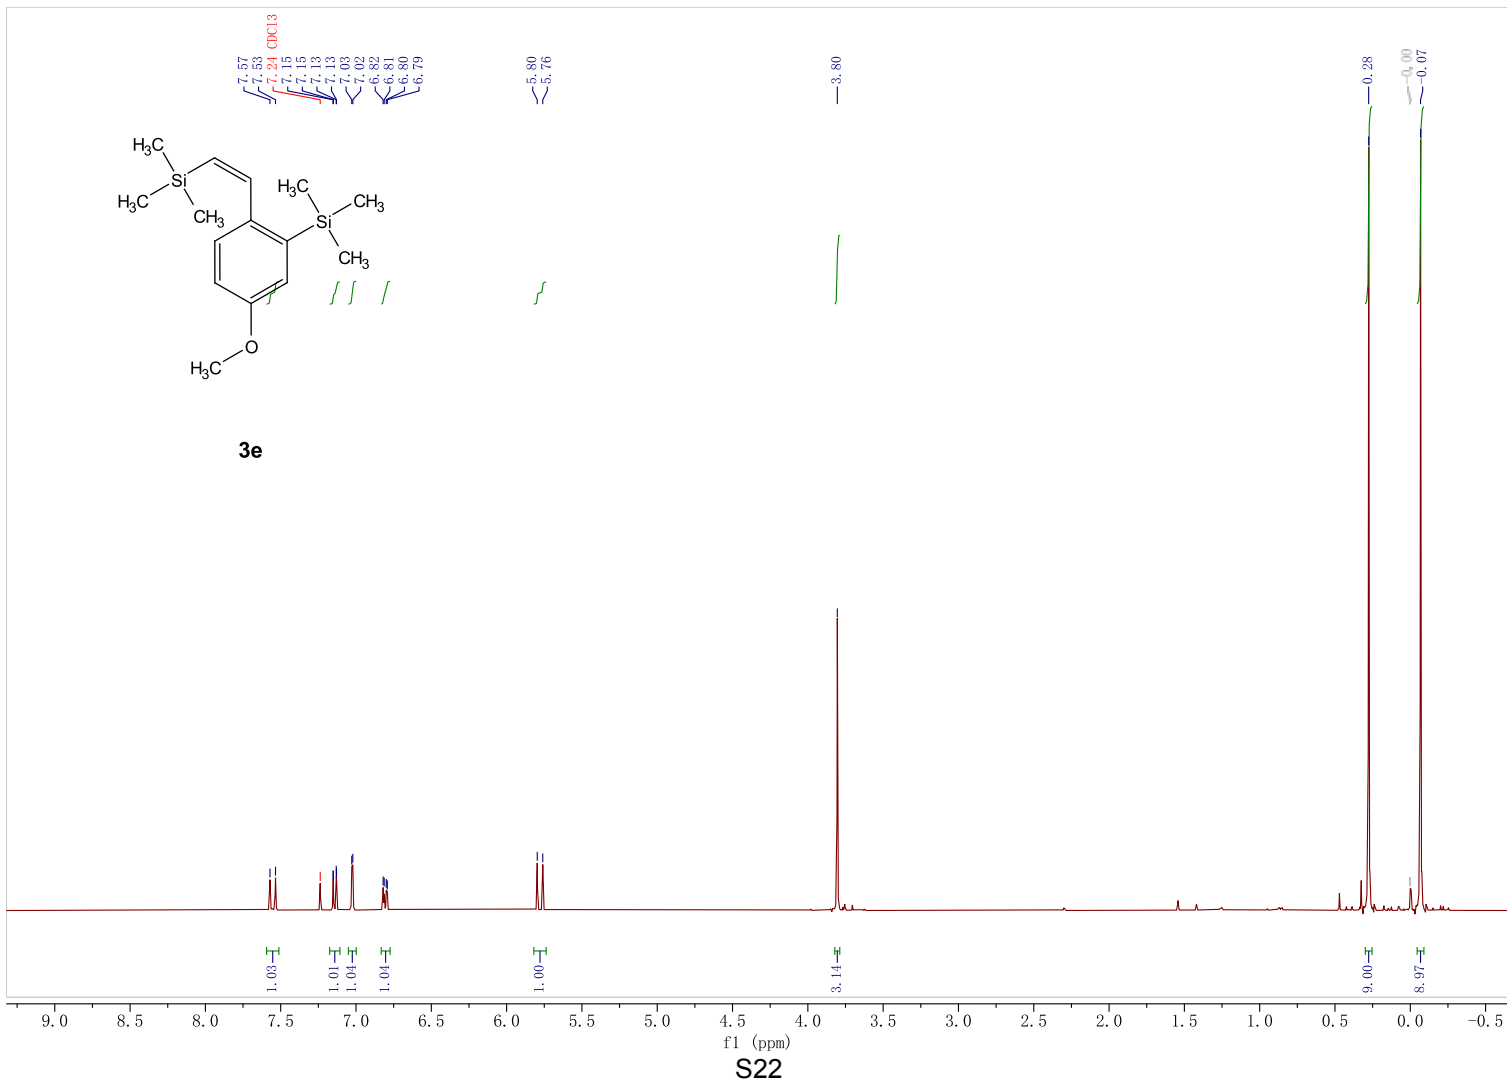

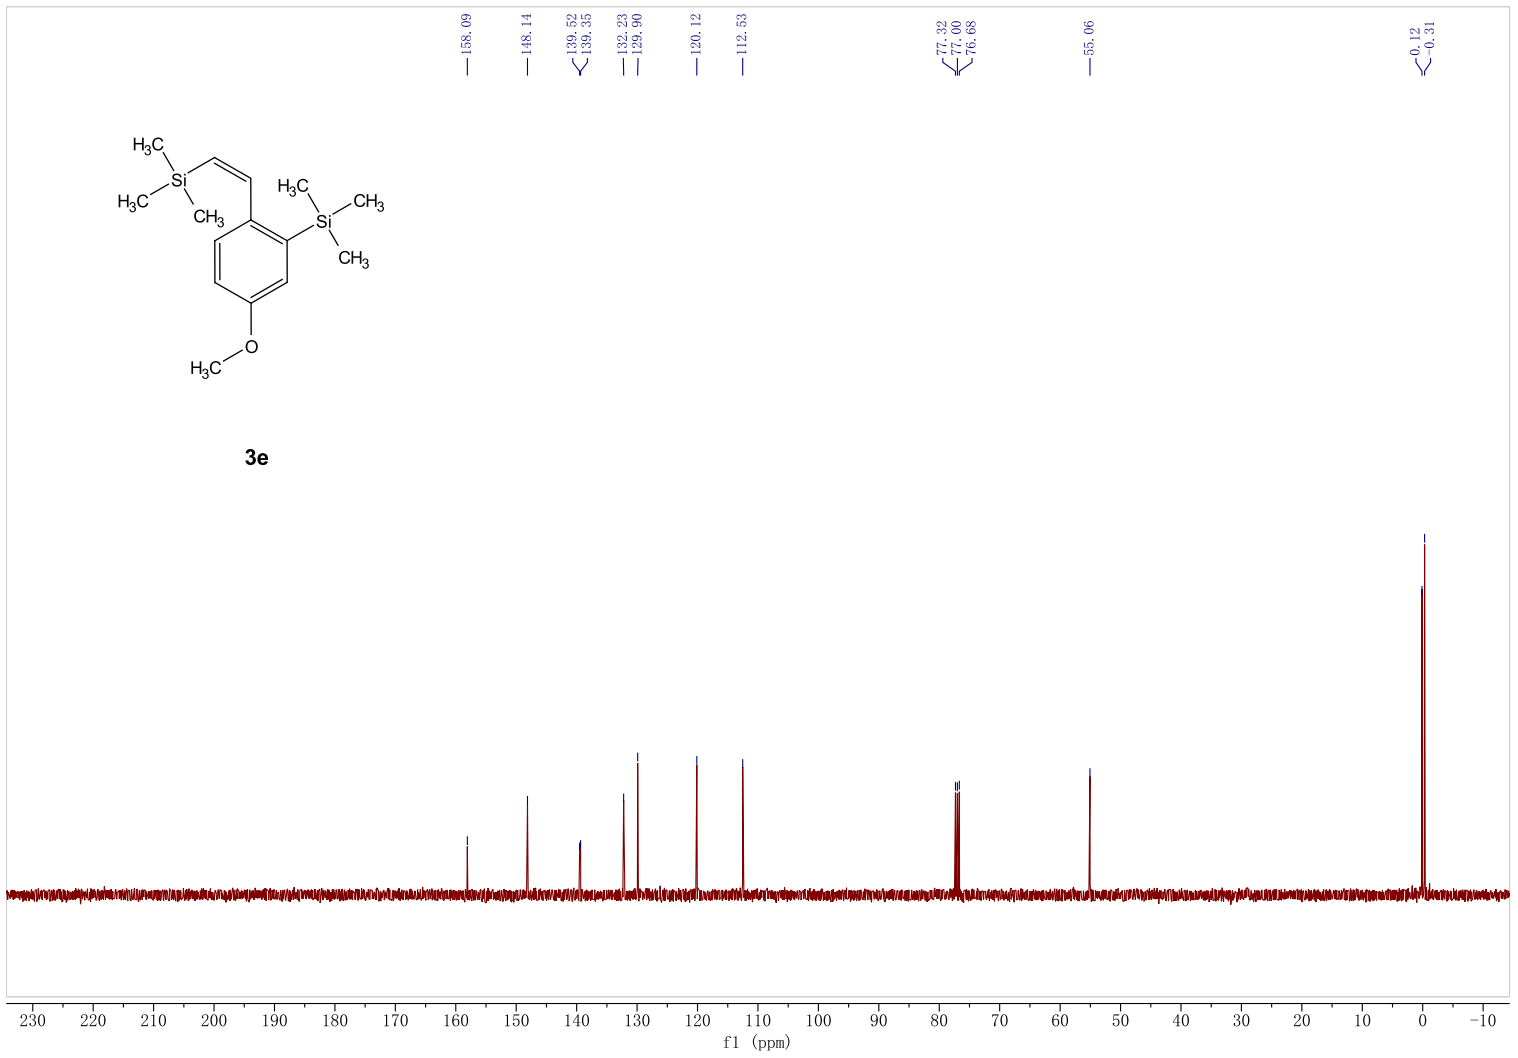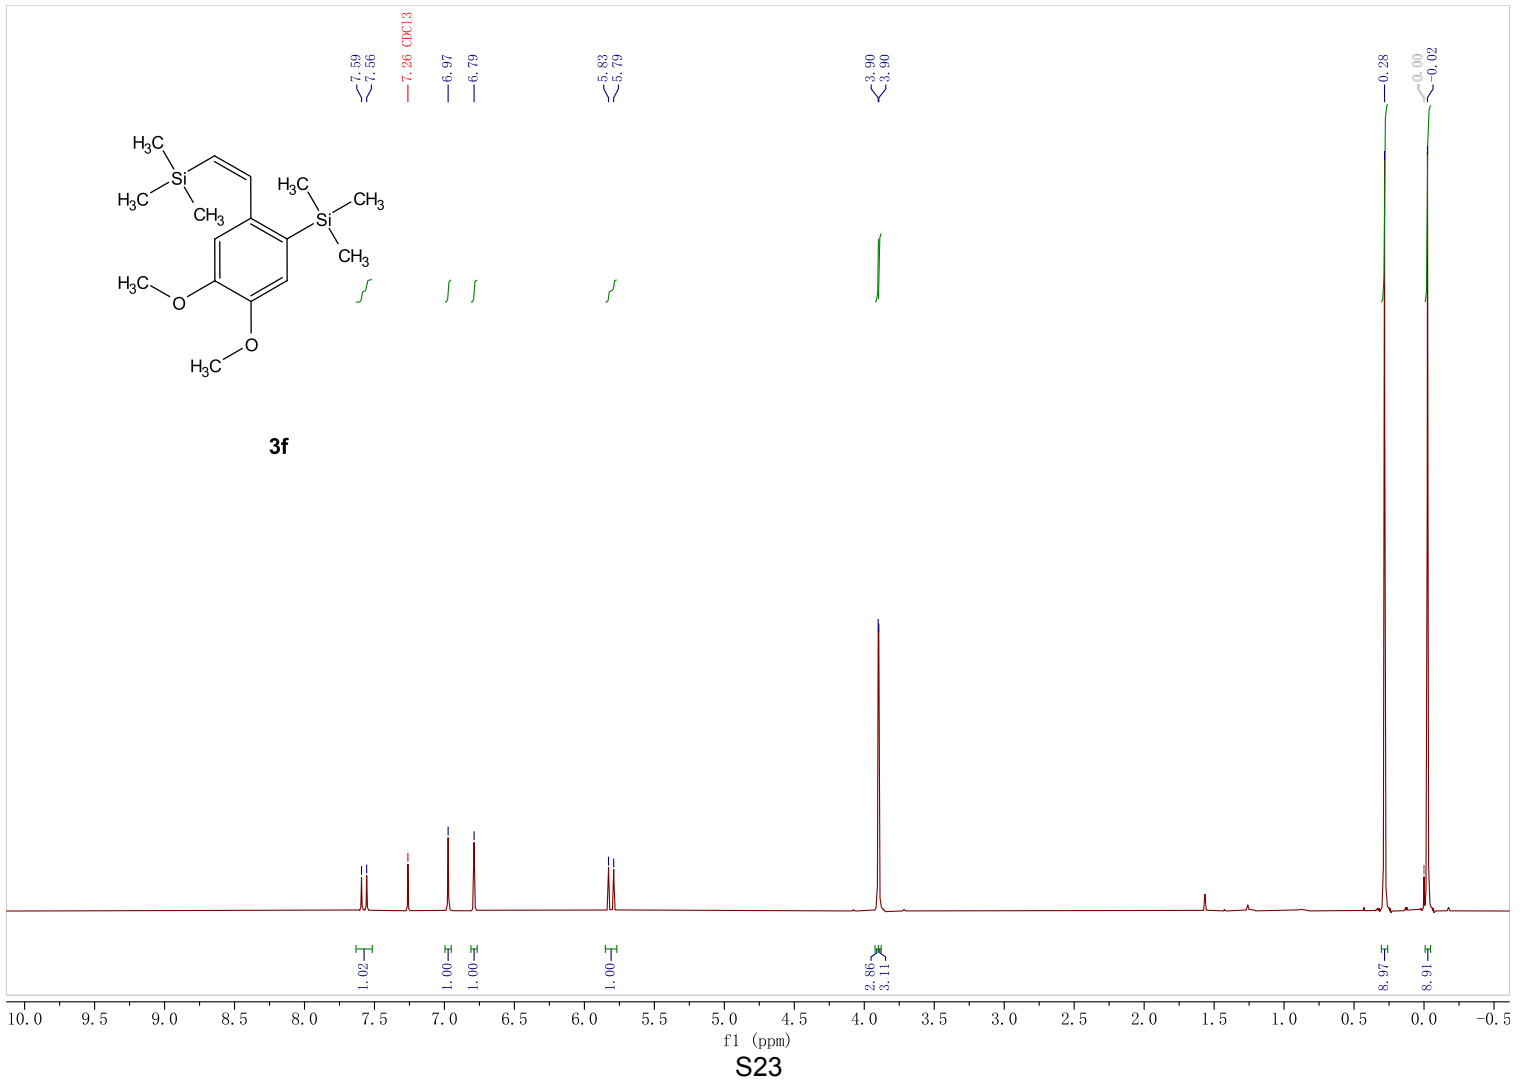

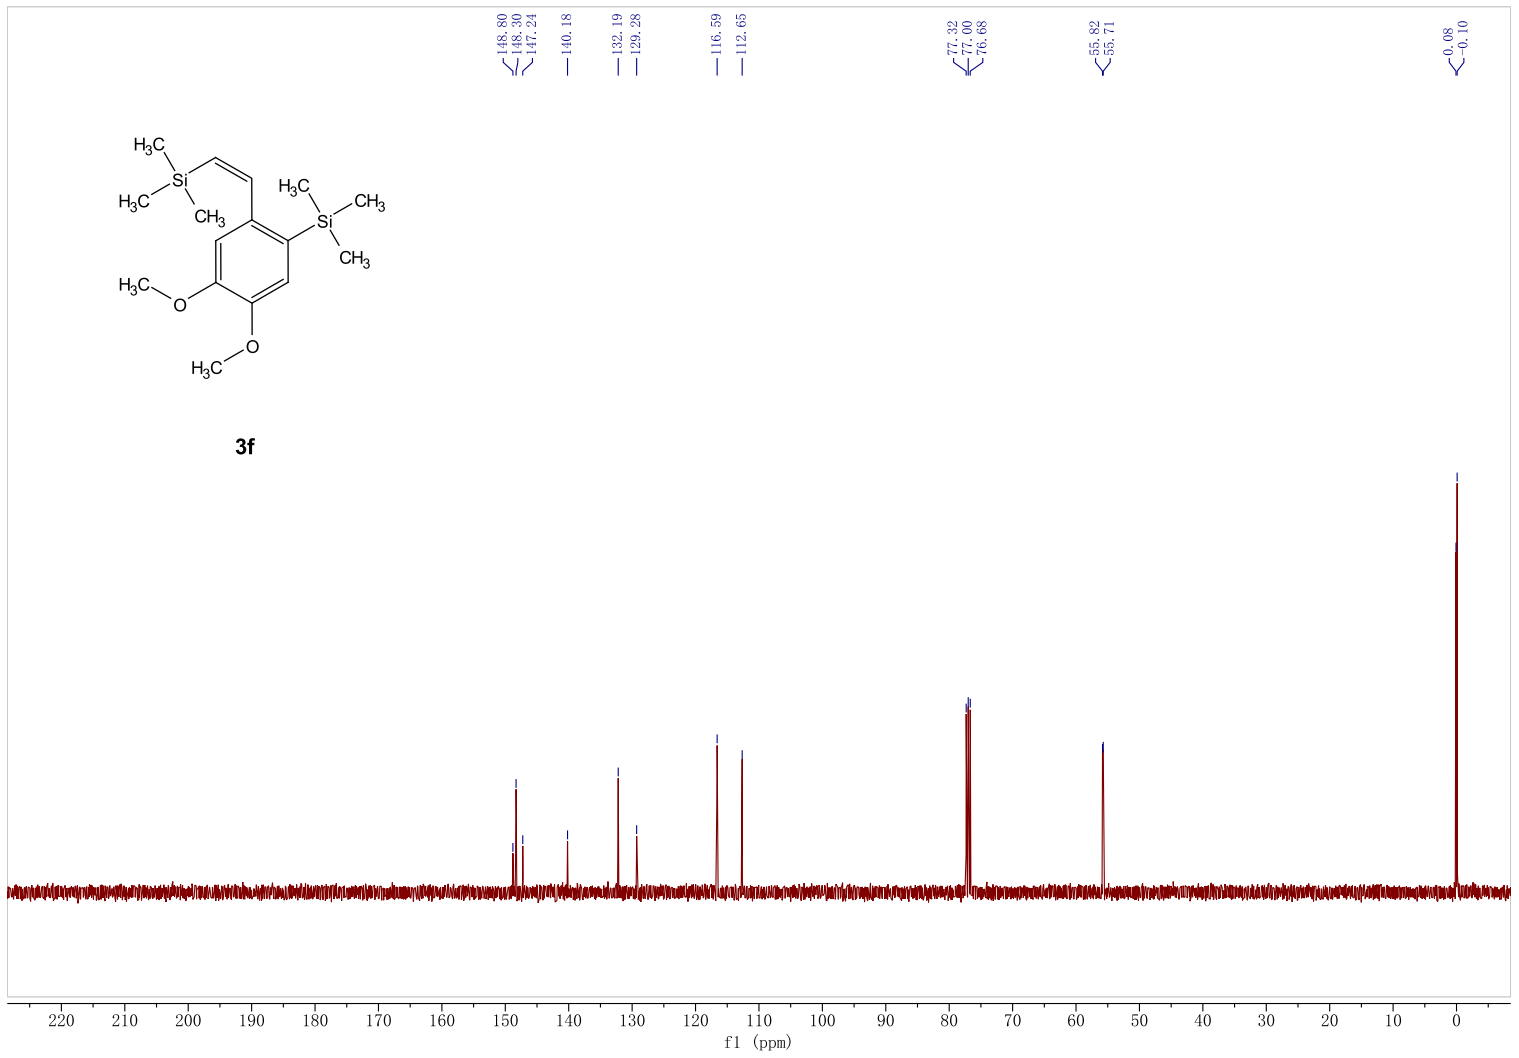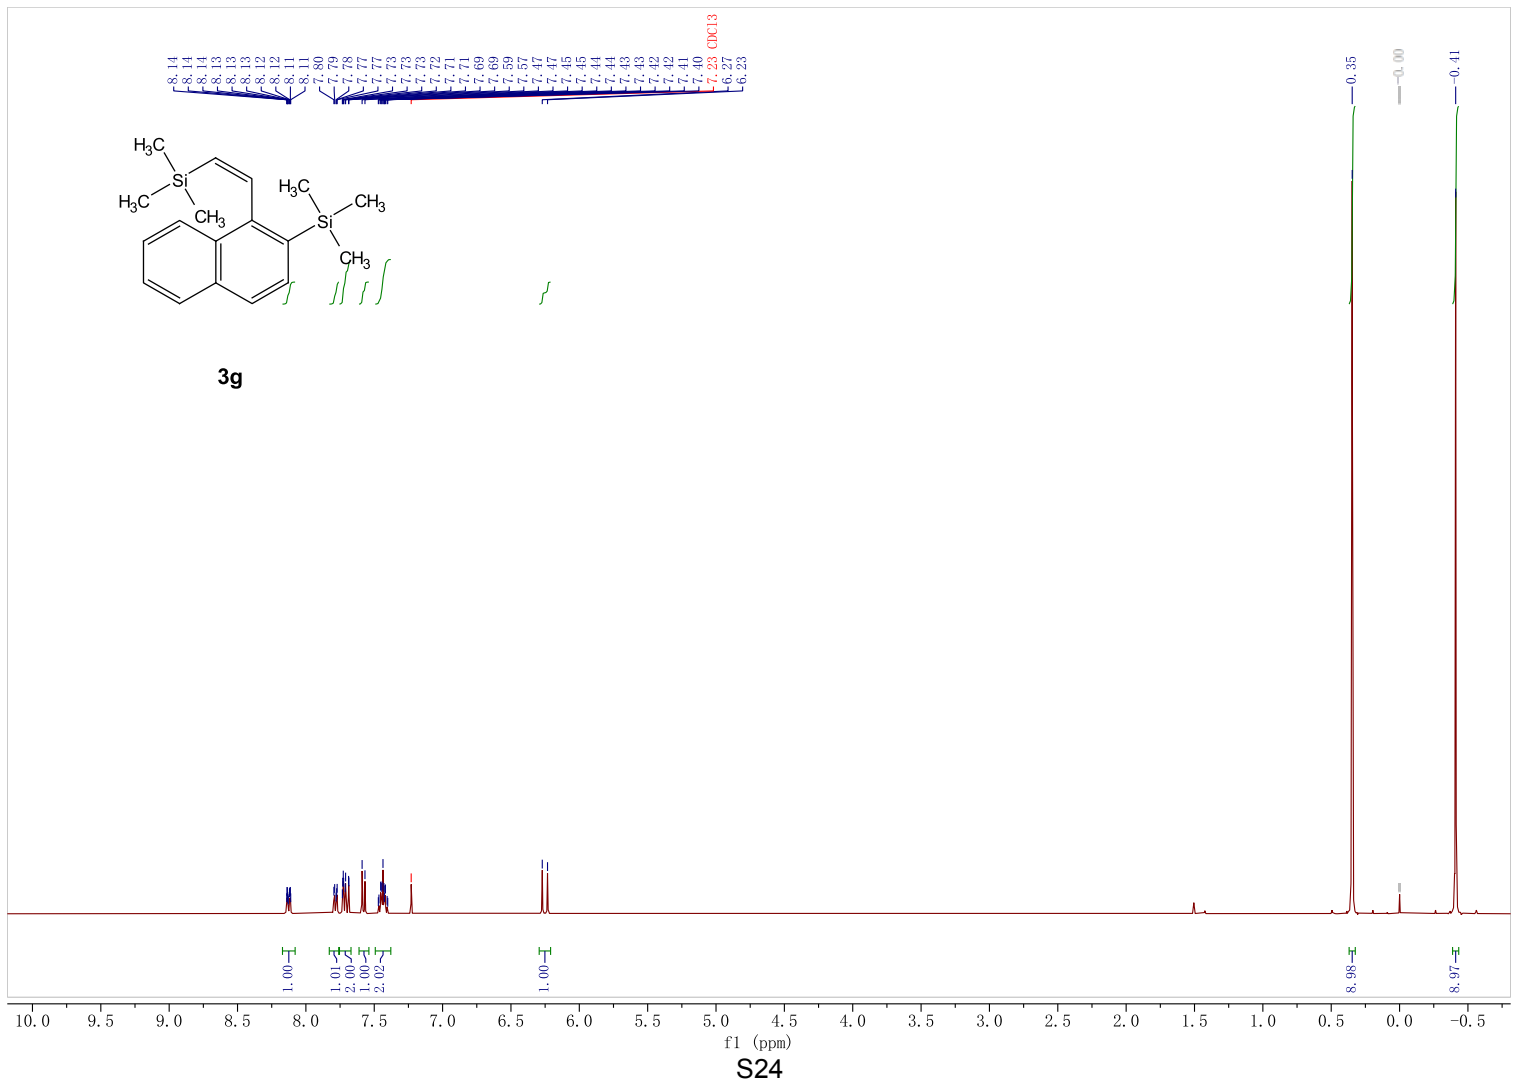



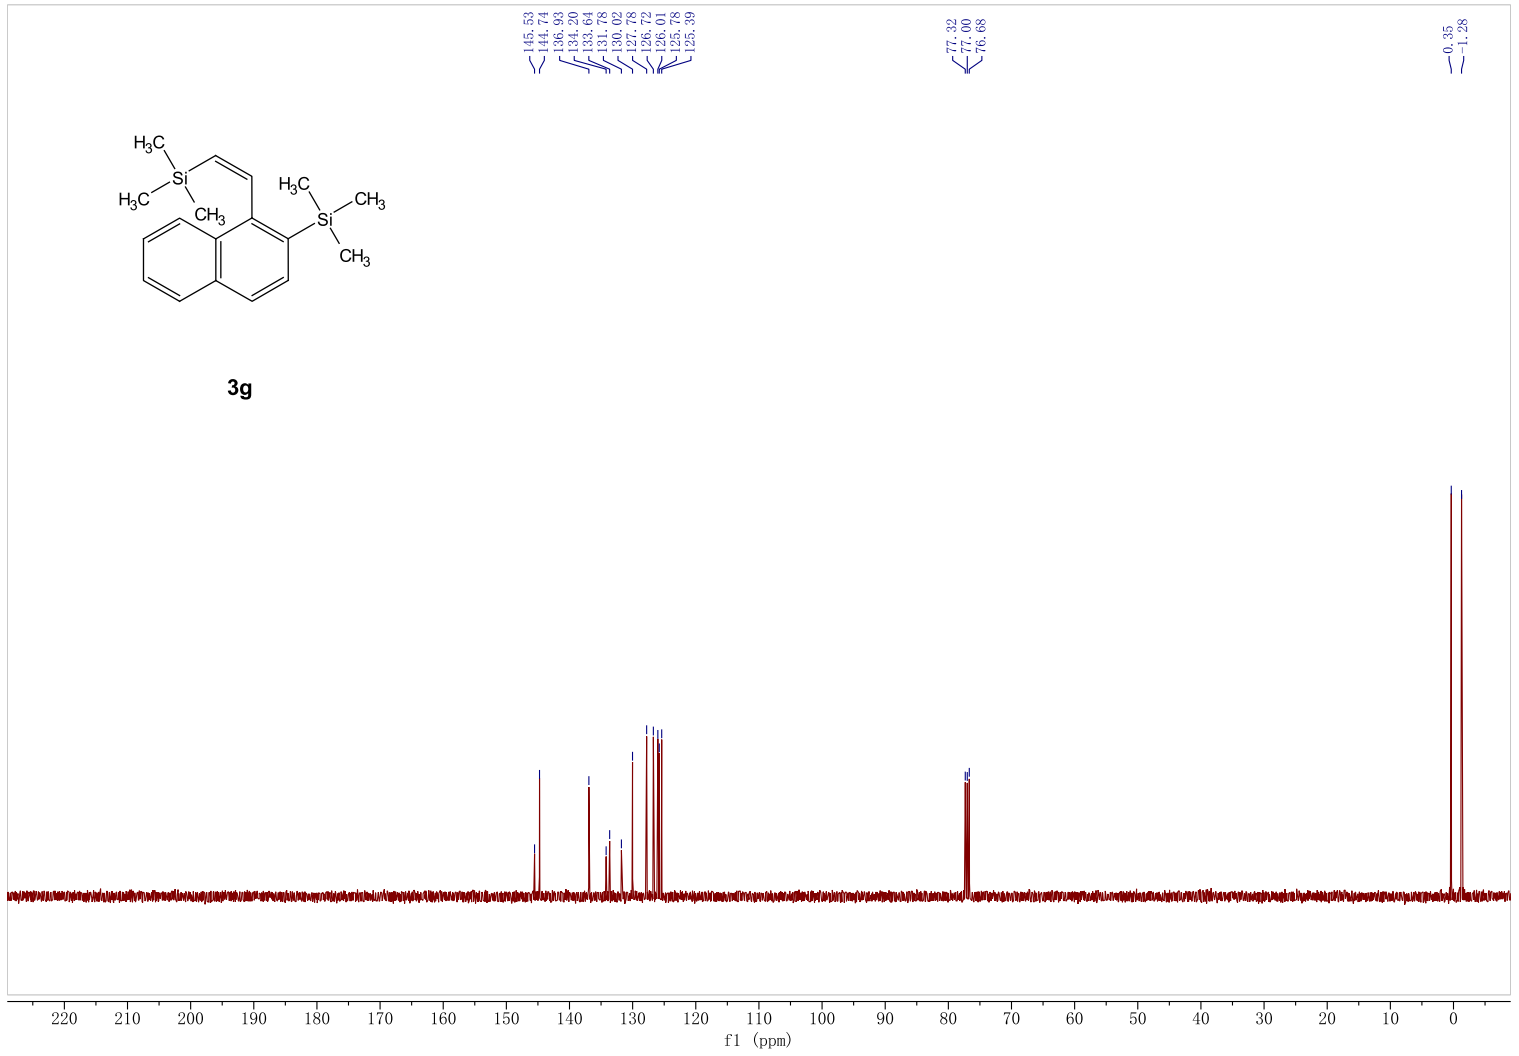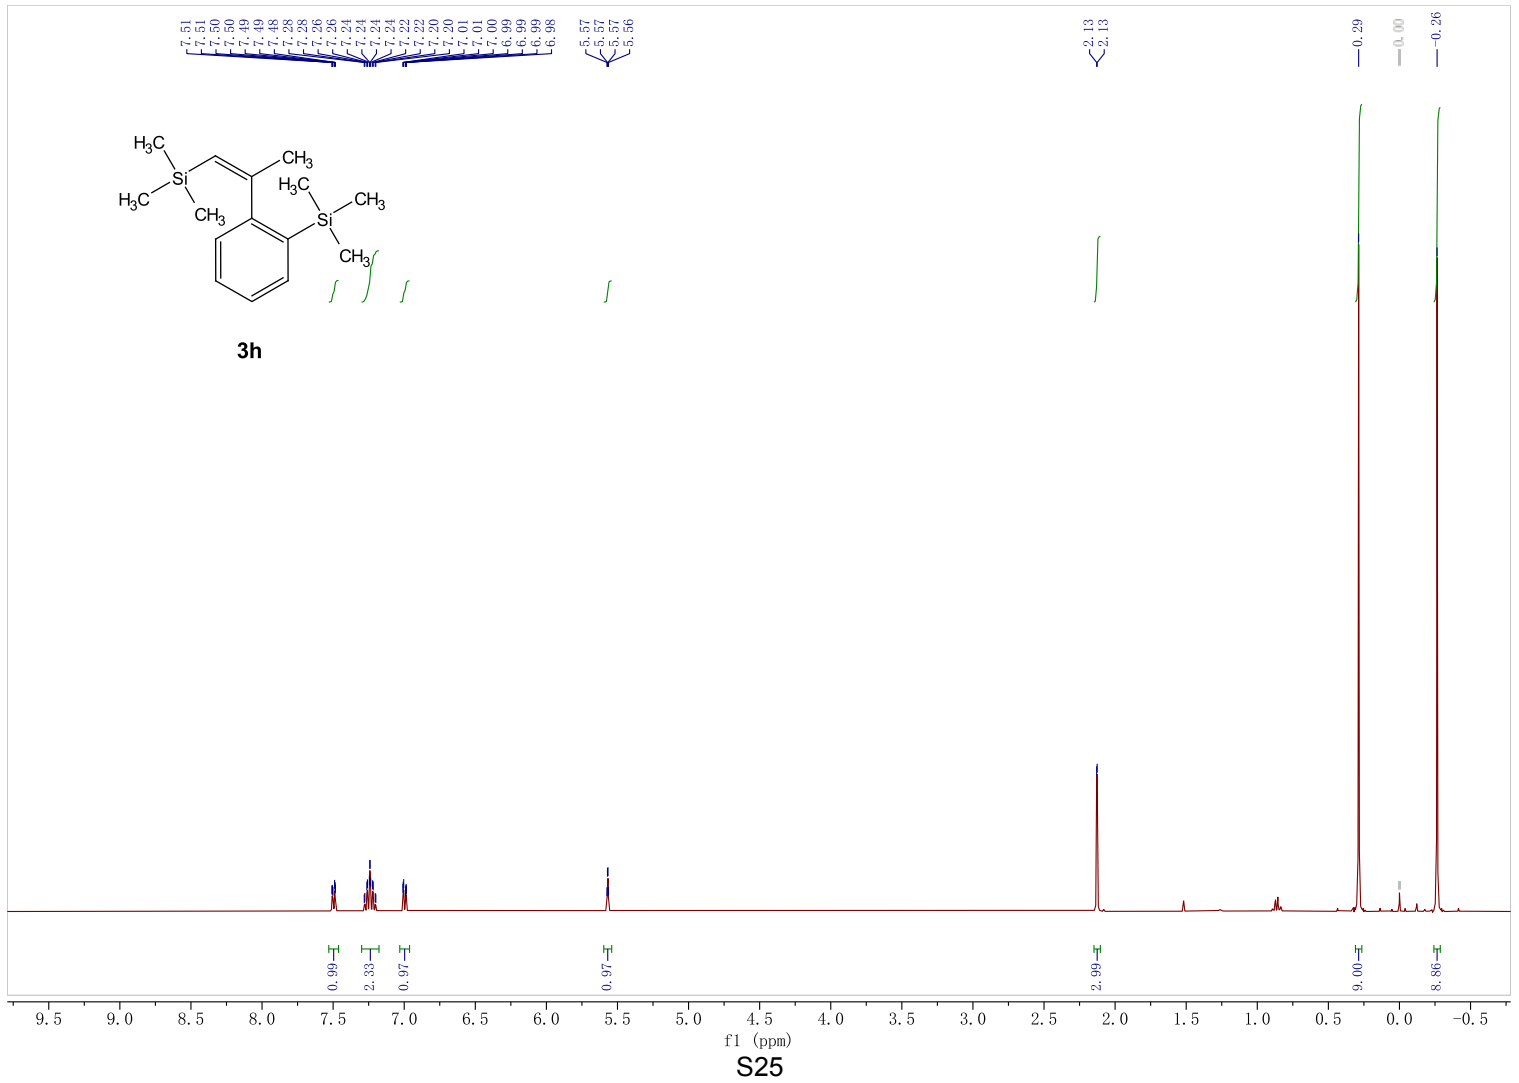

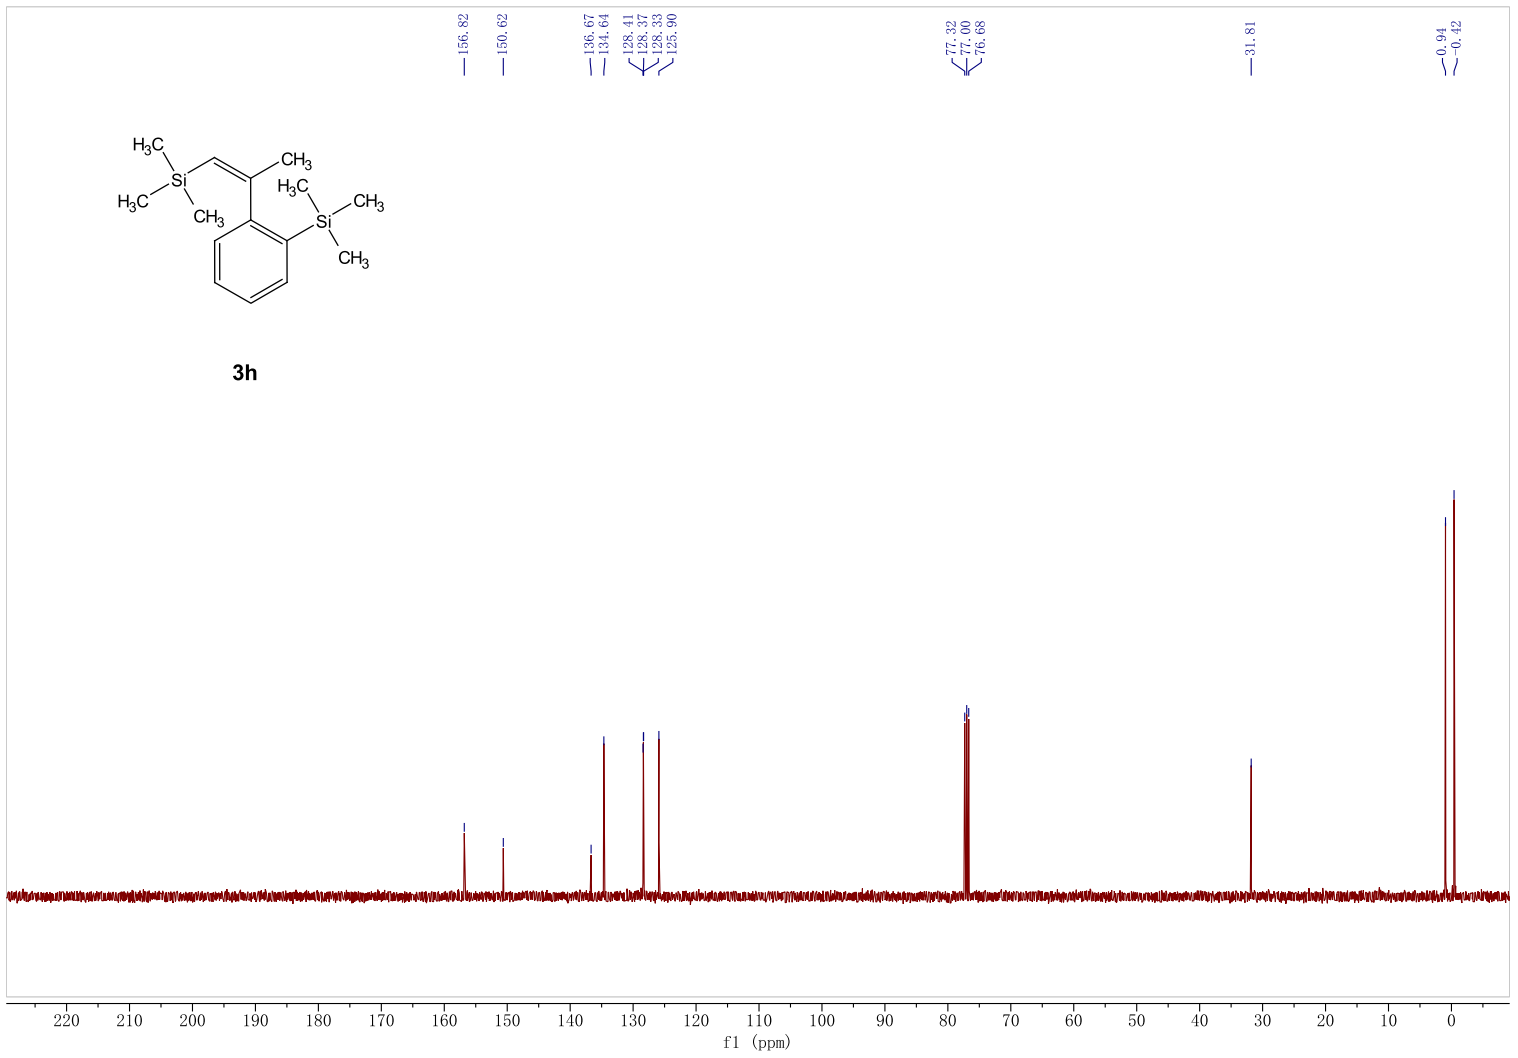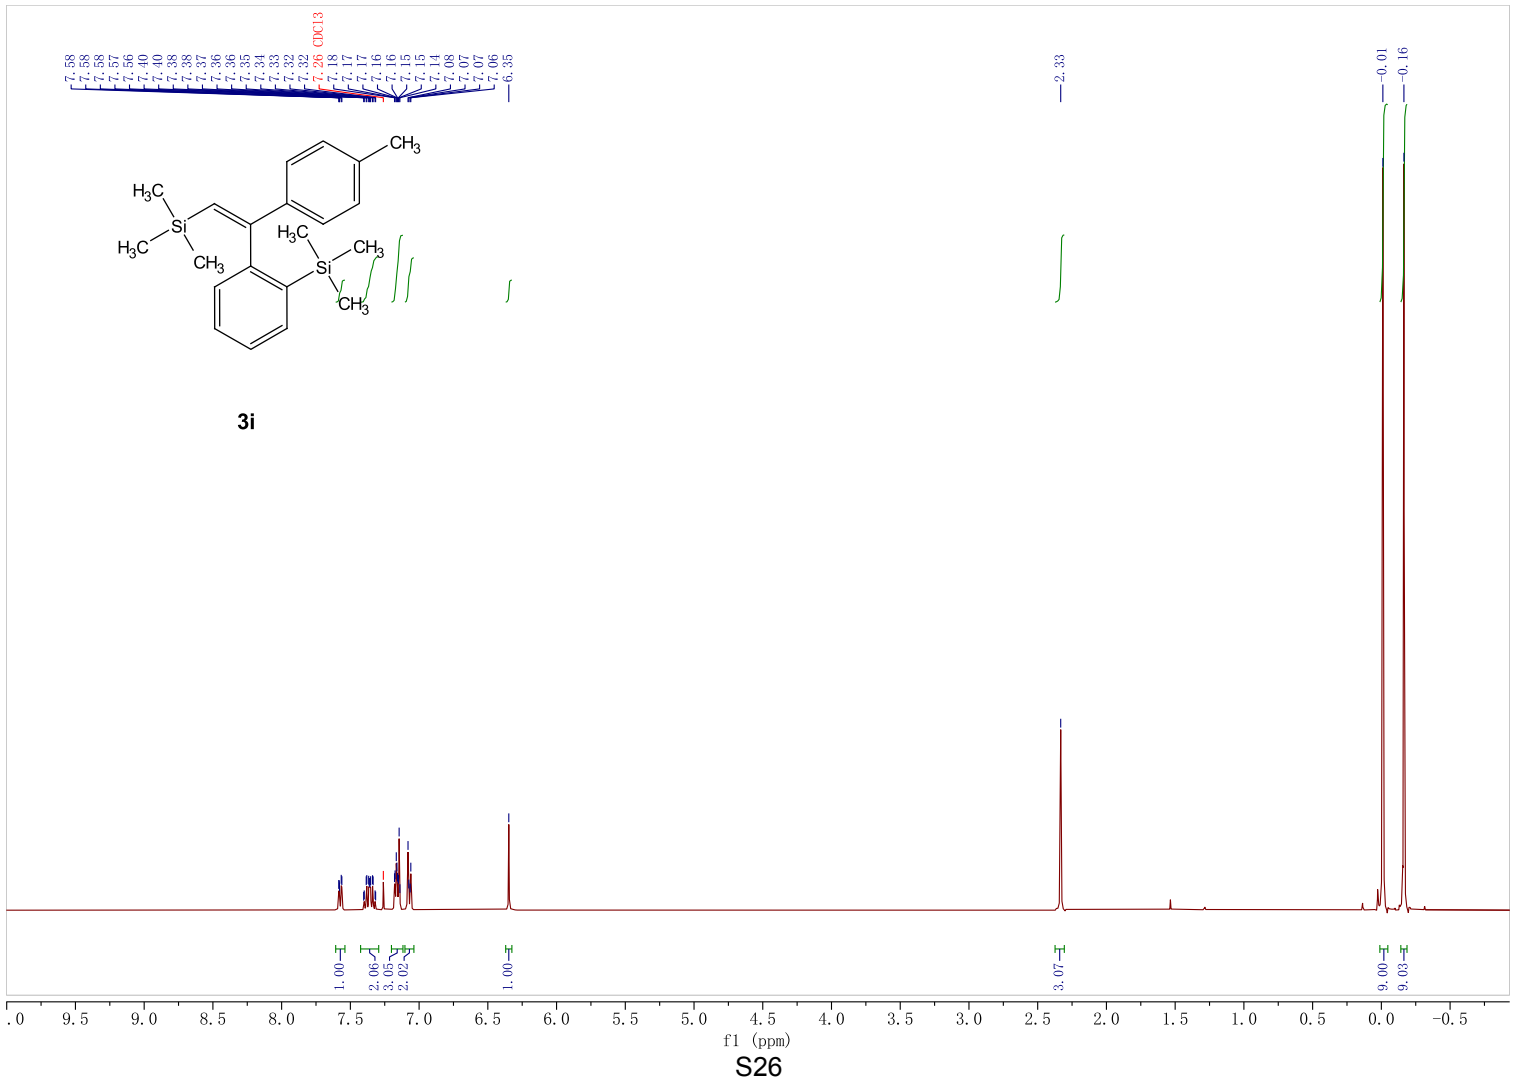

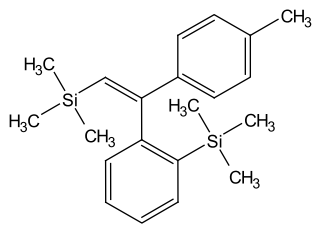

**3i**

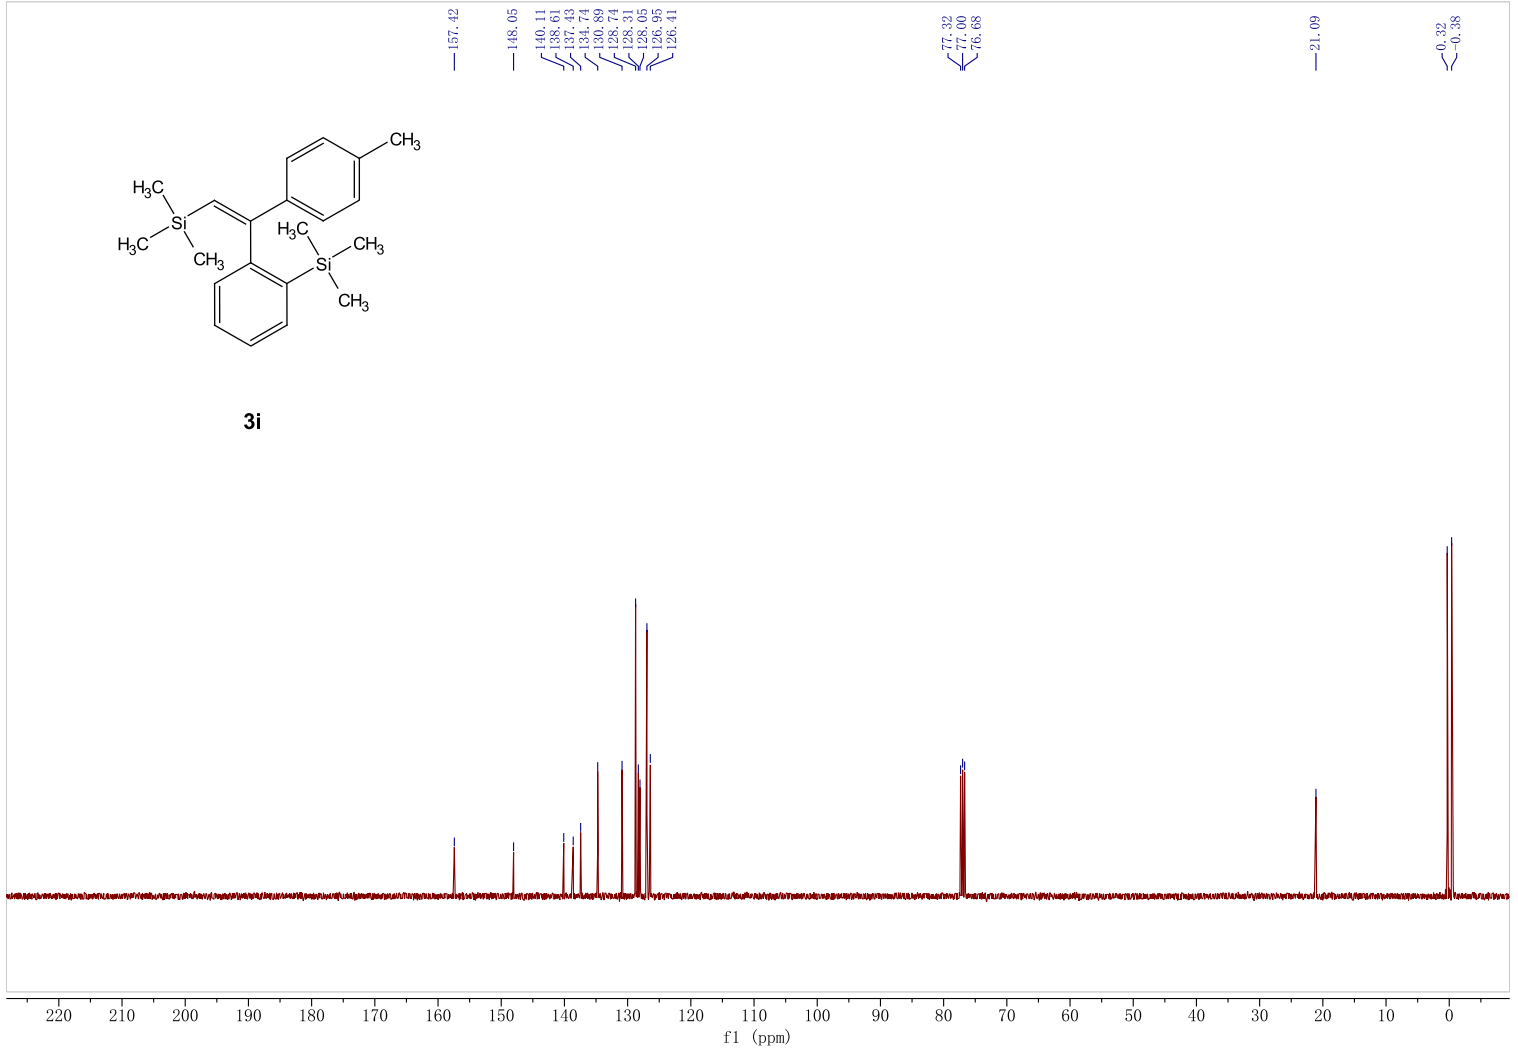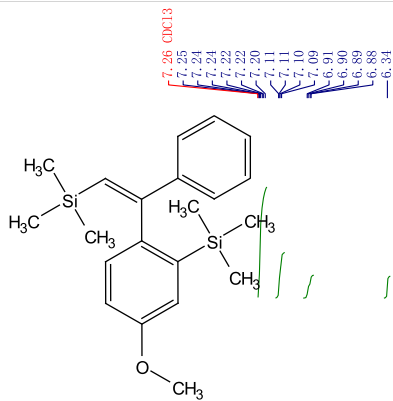

**3j**

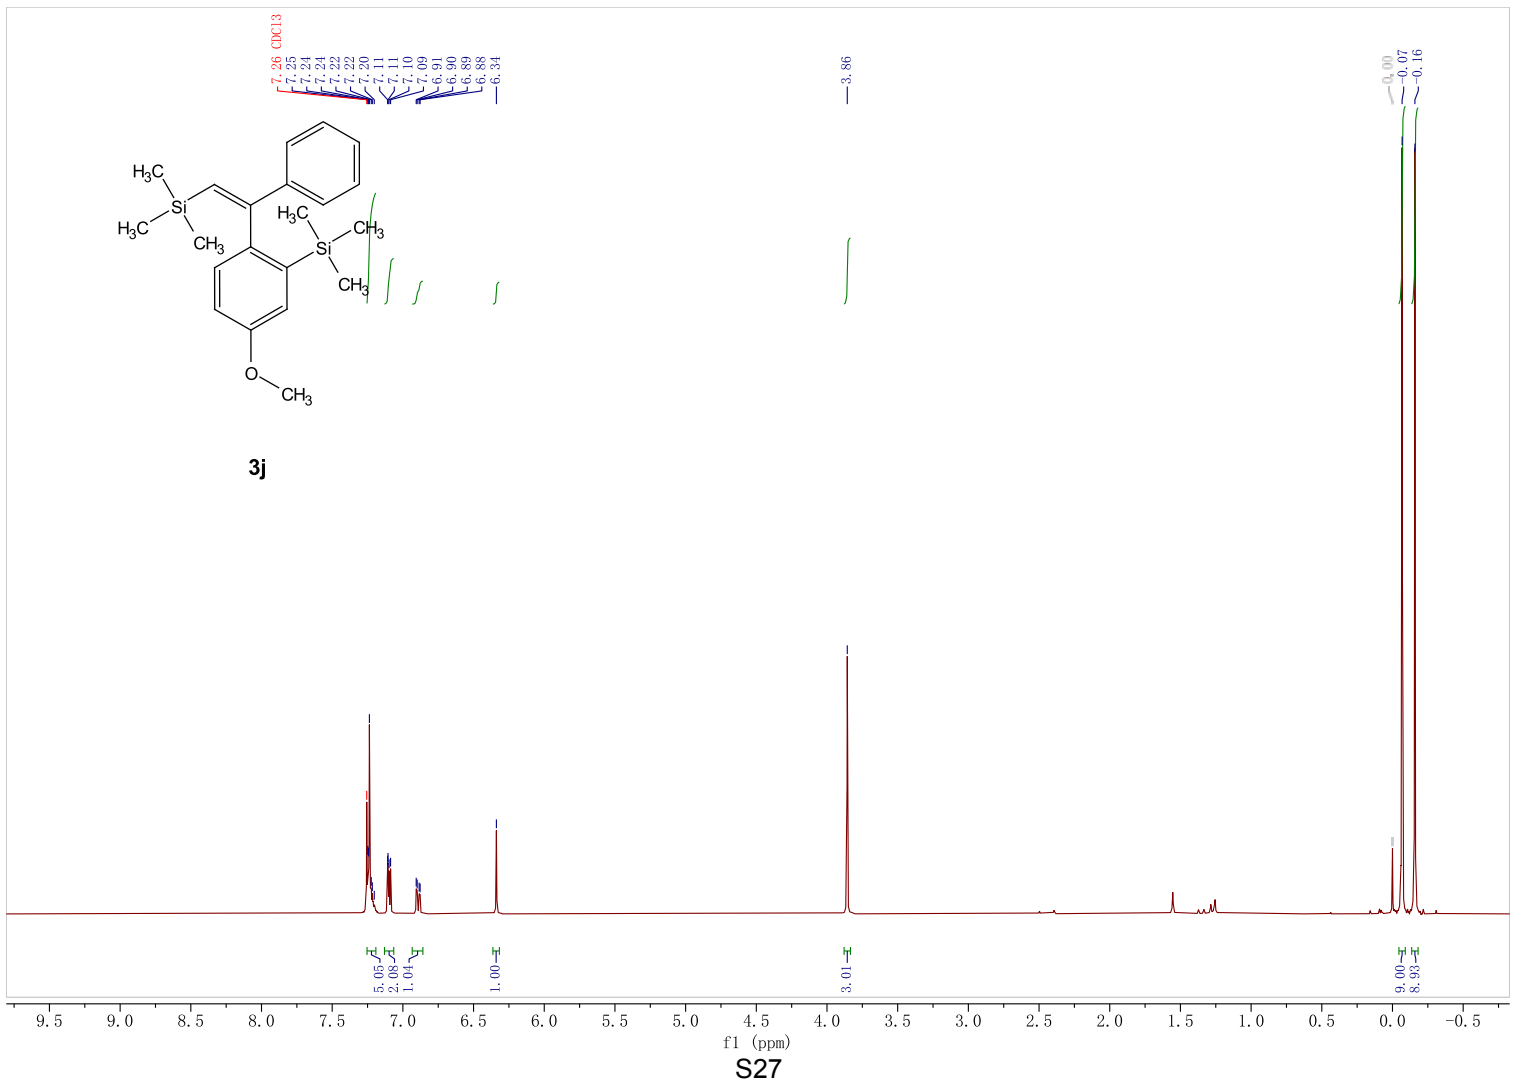

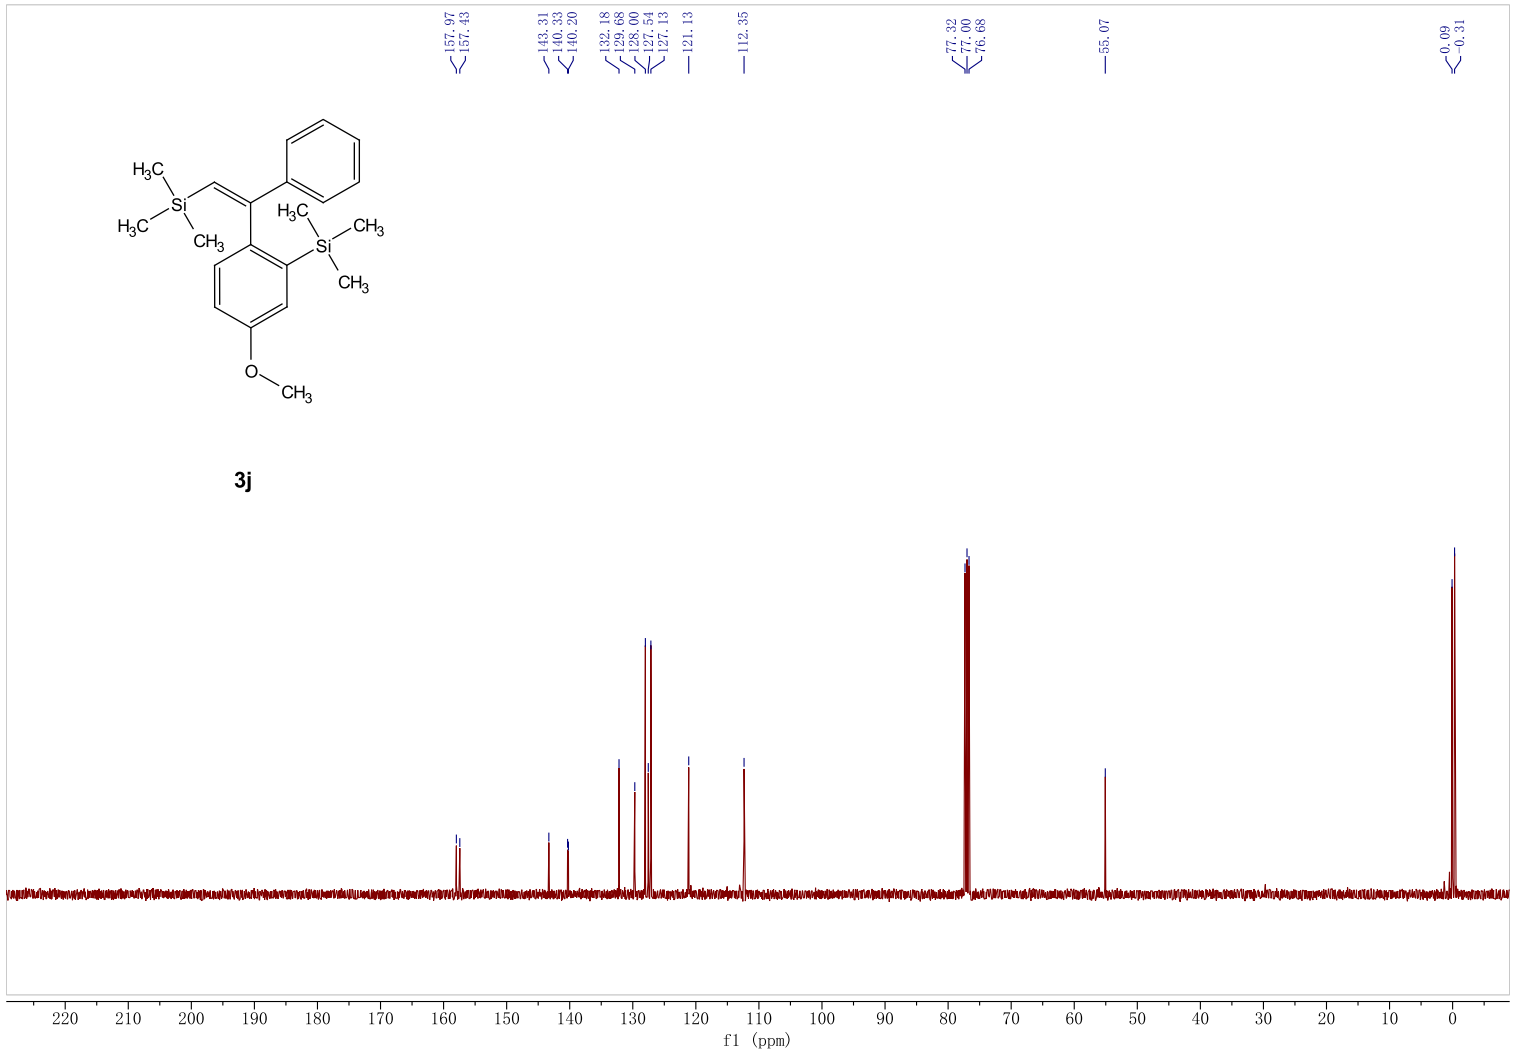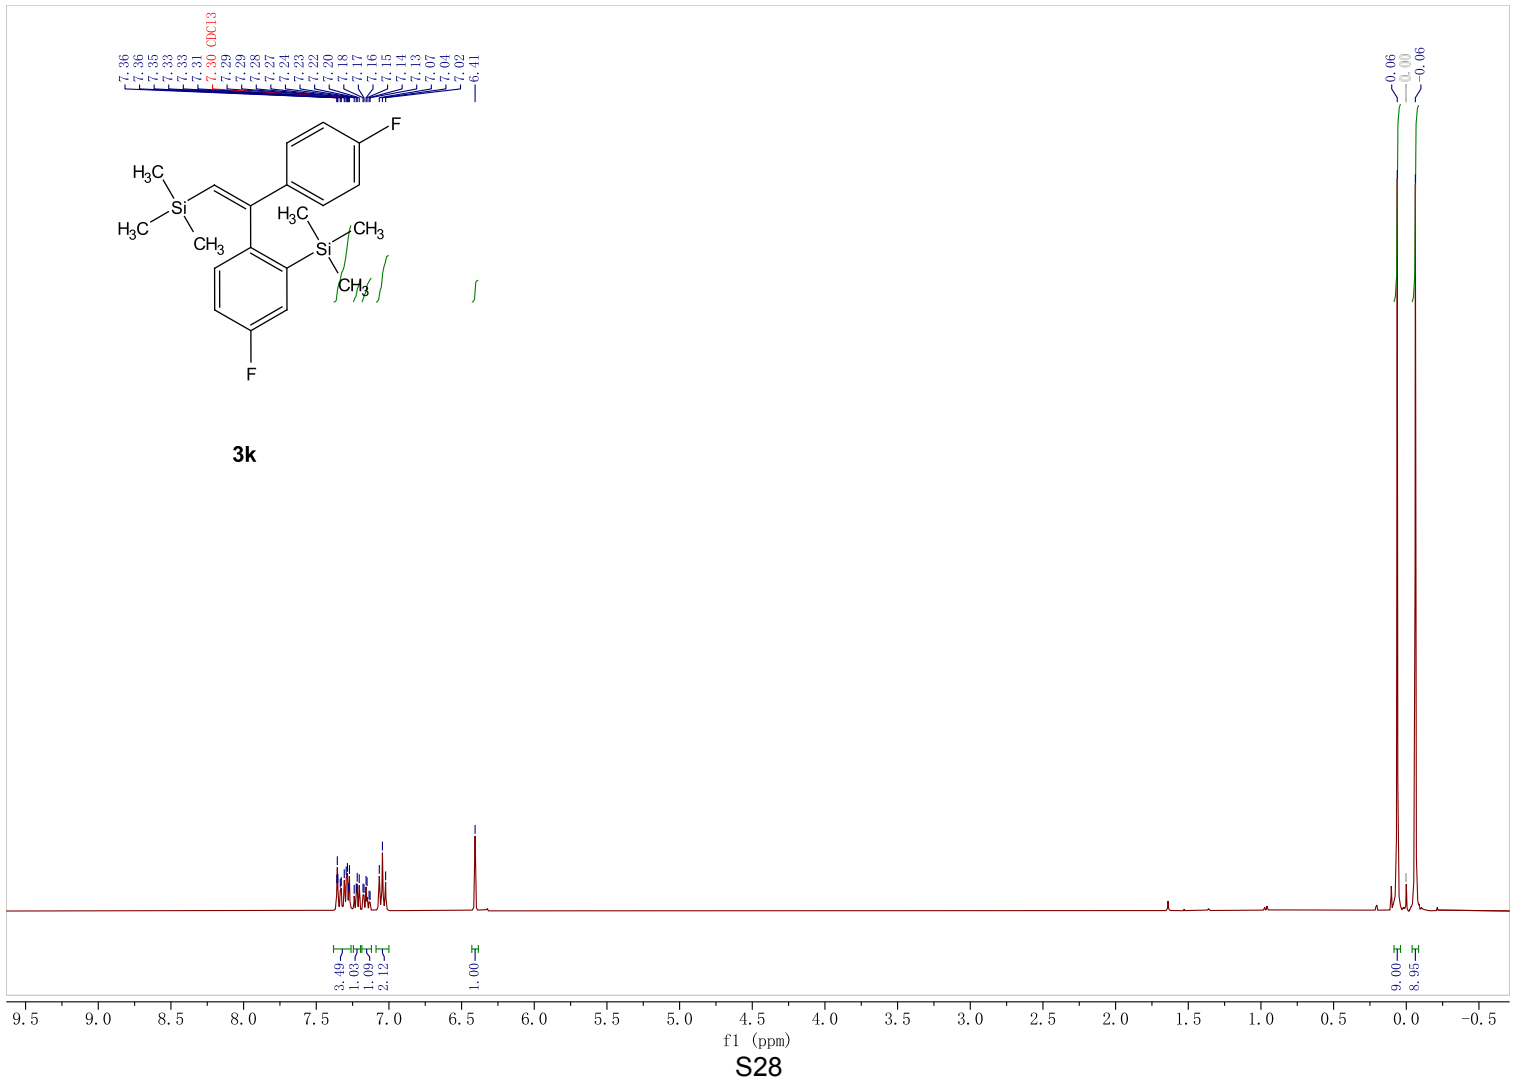

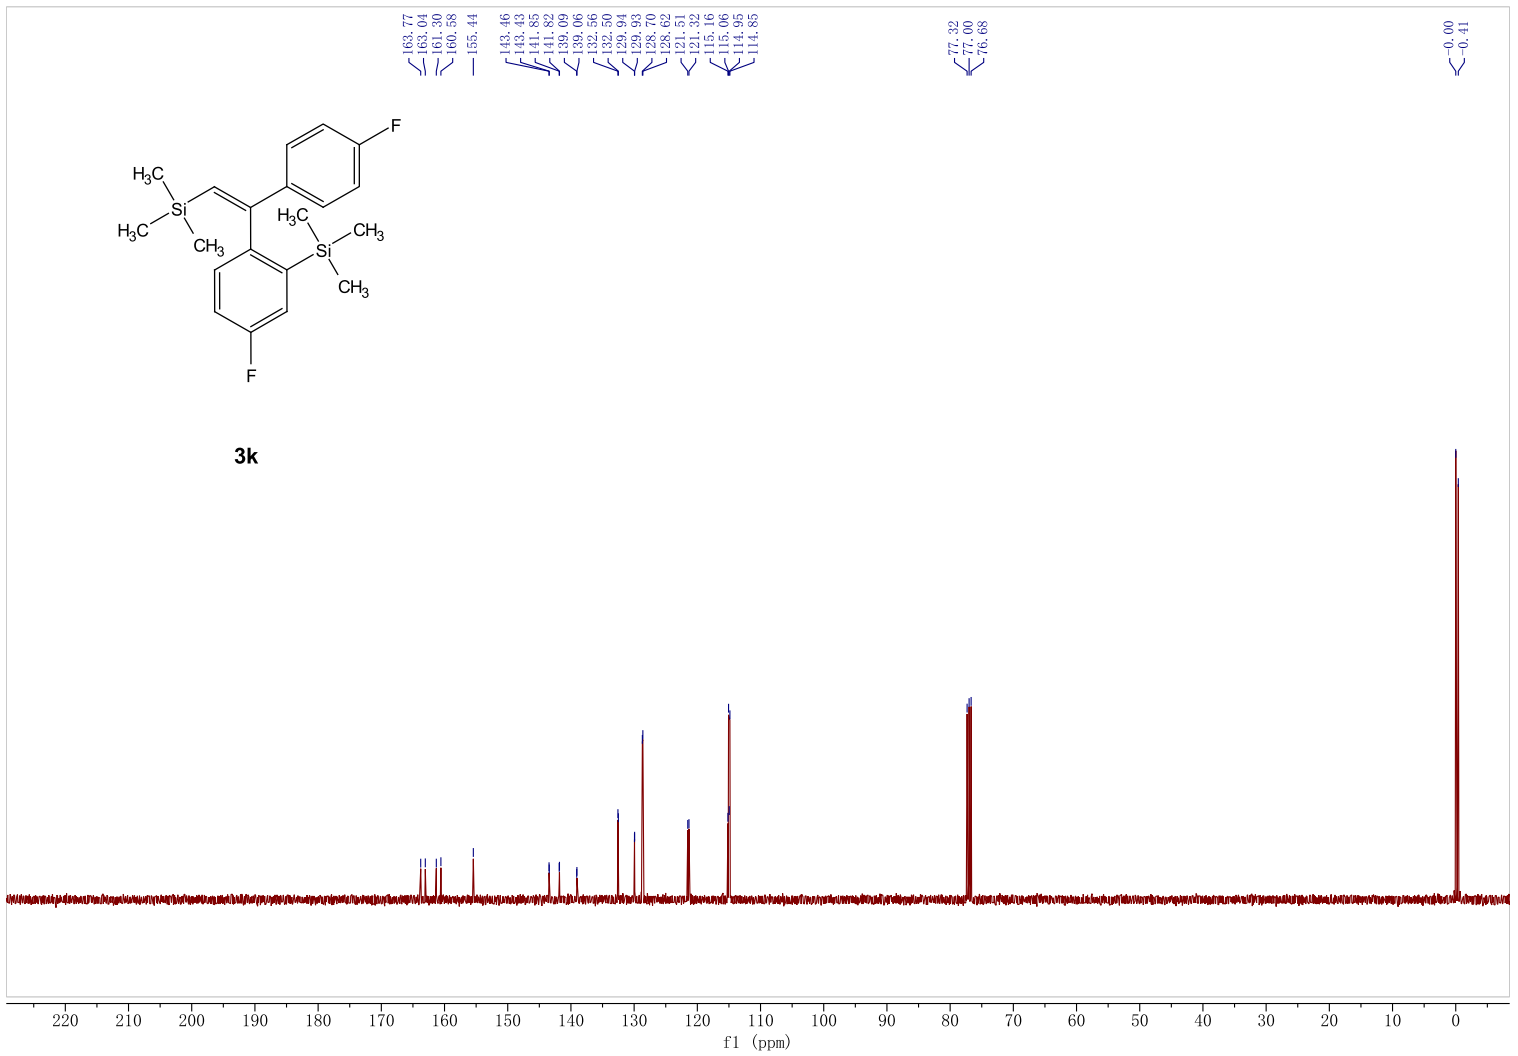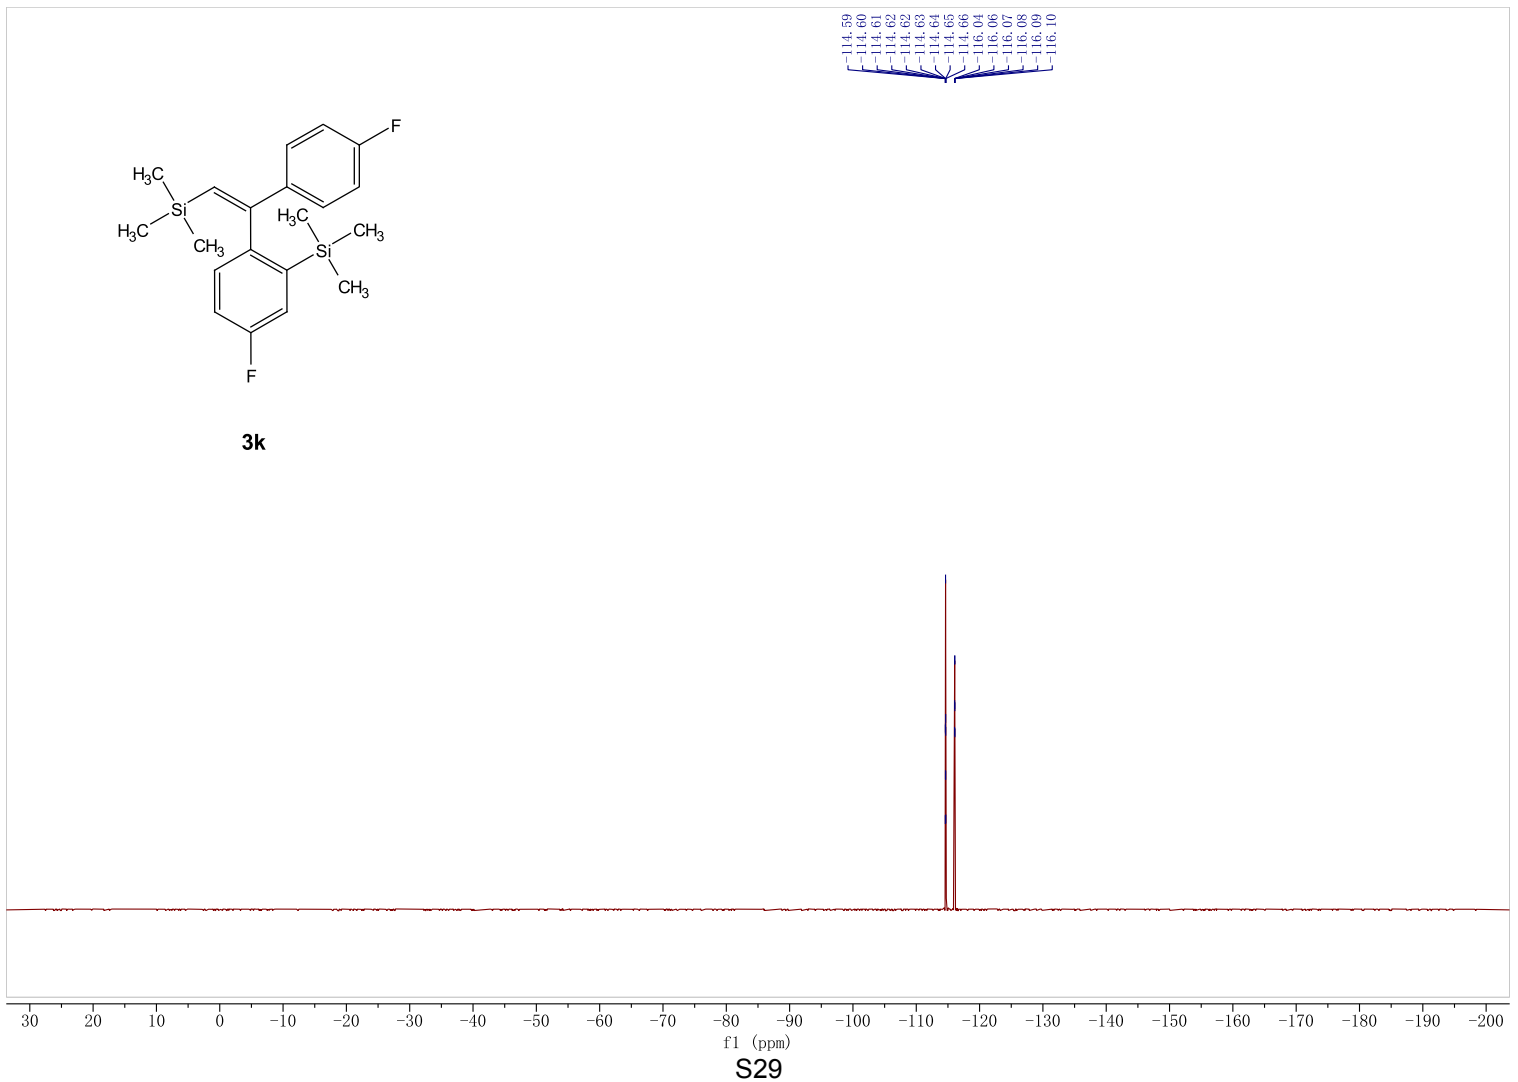

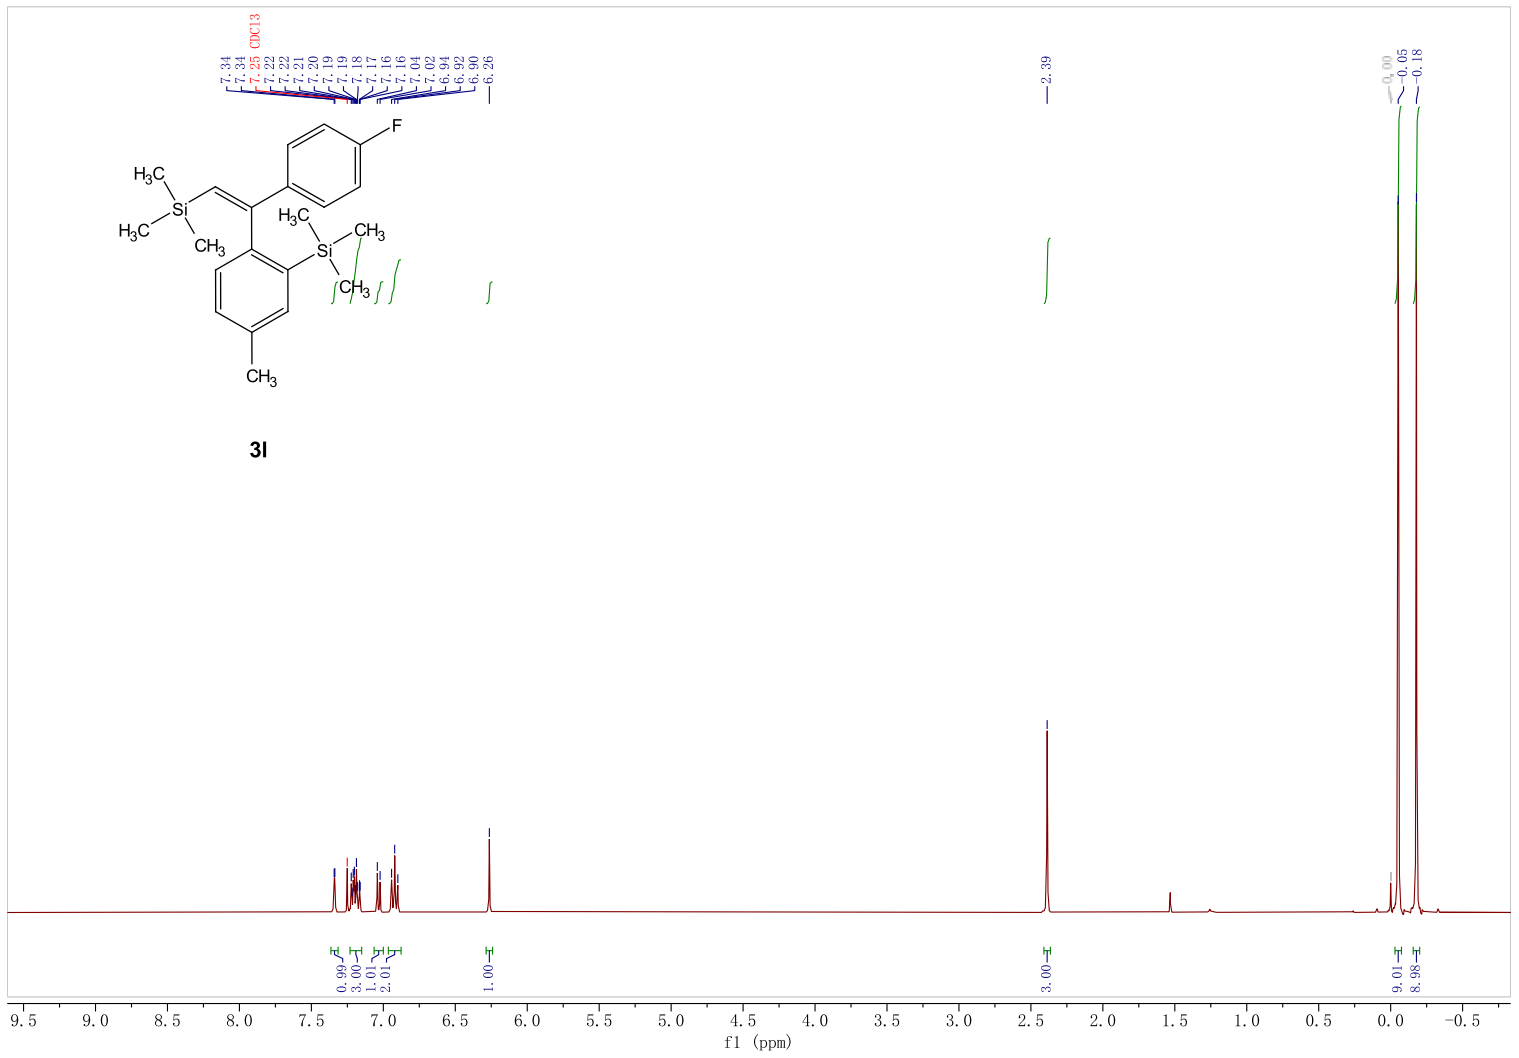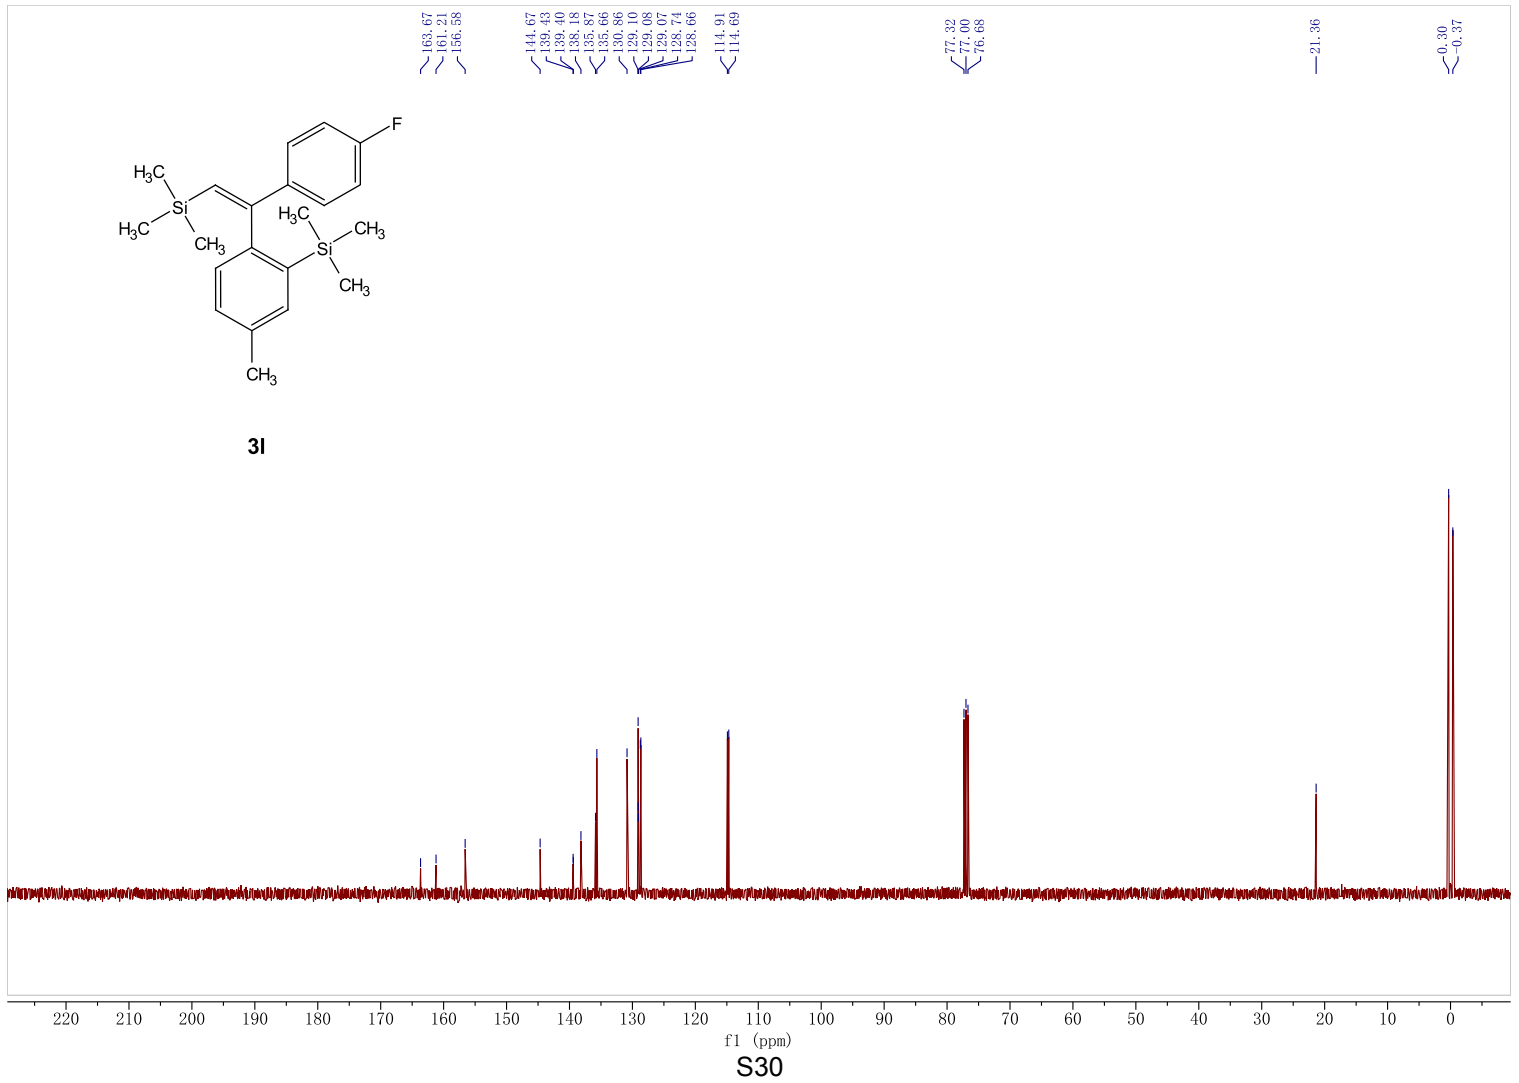

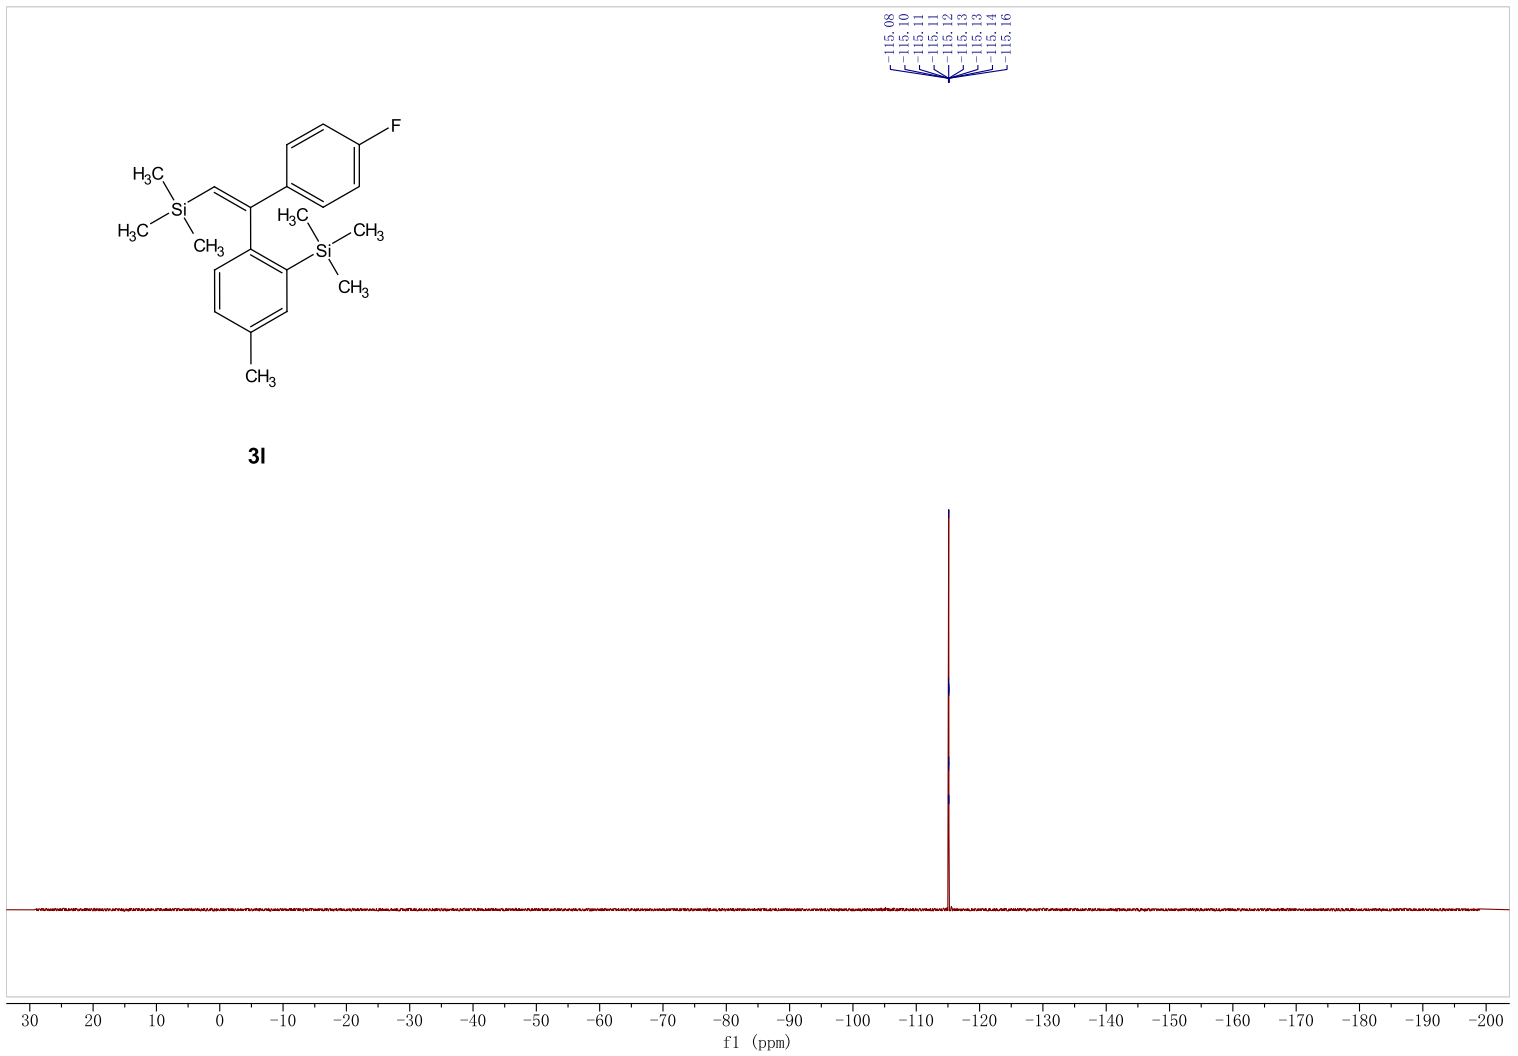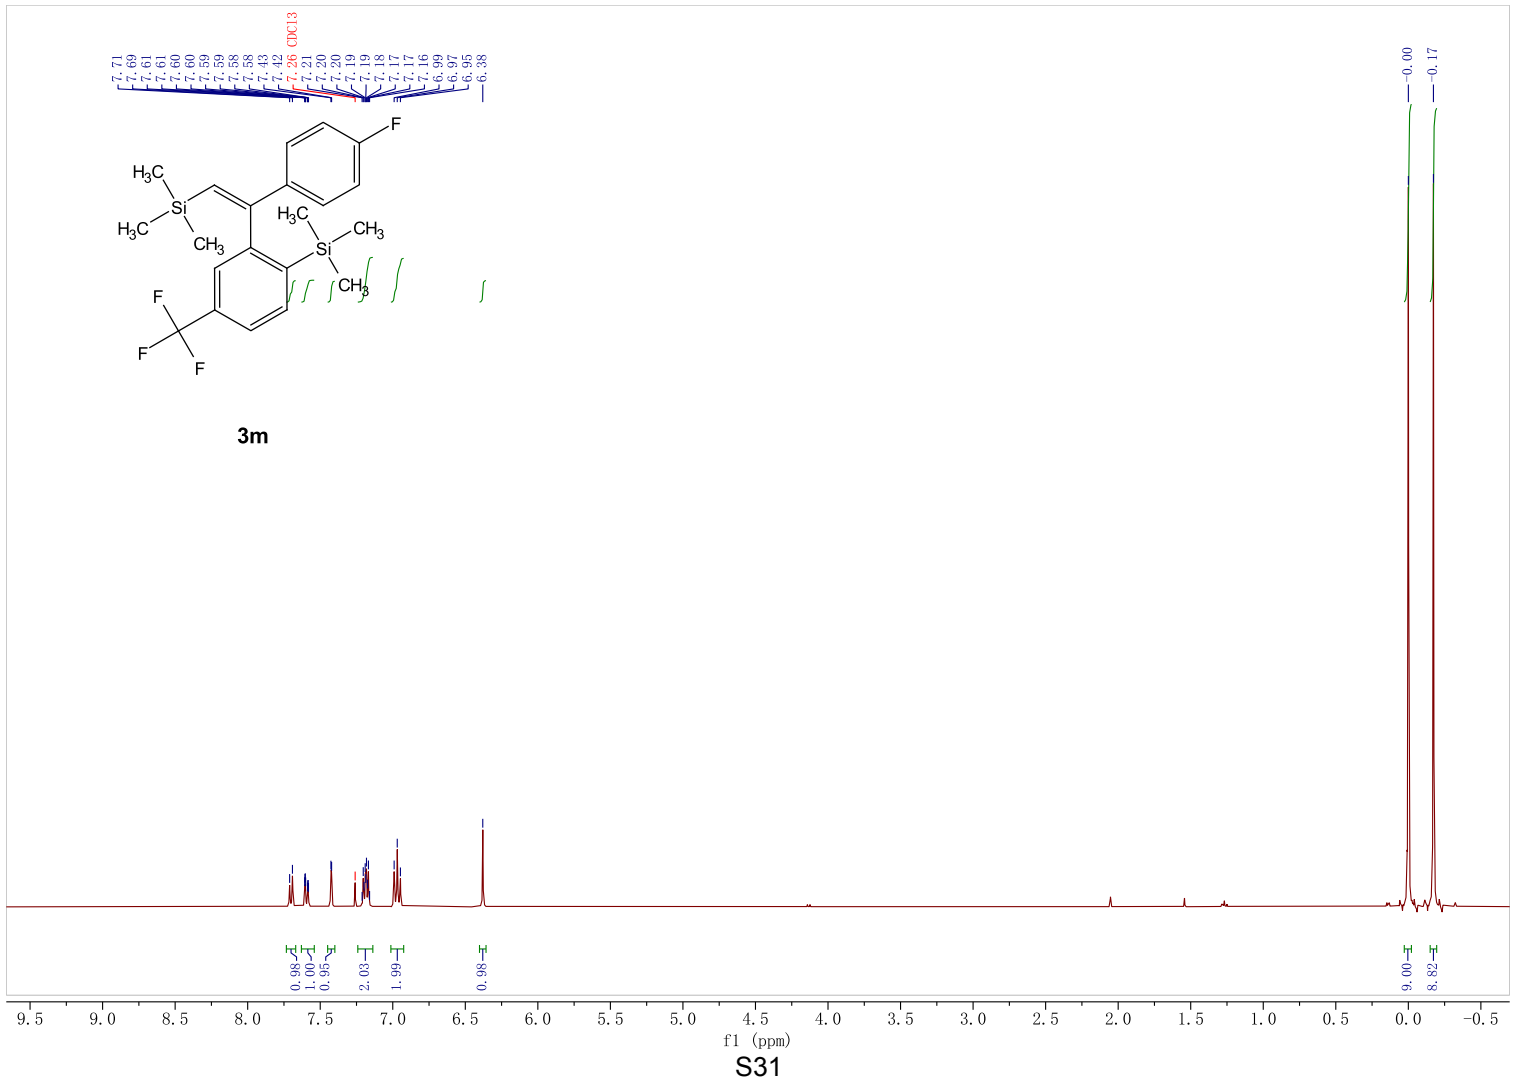

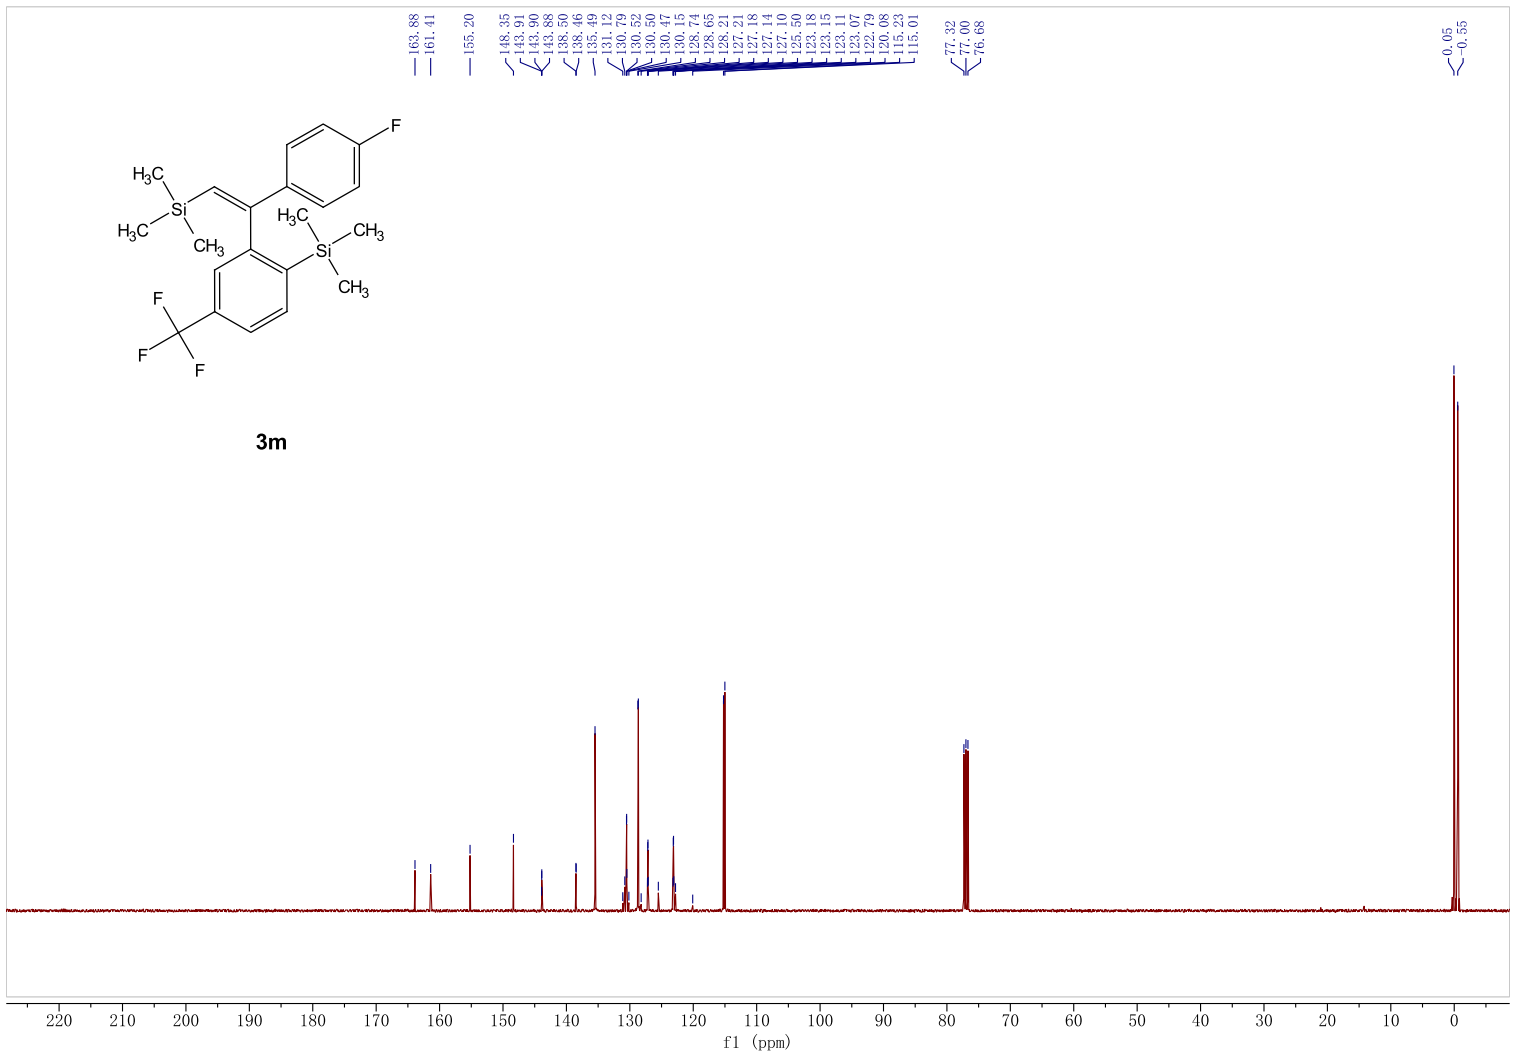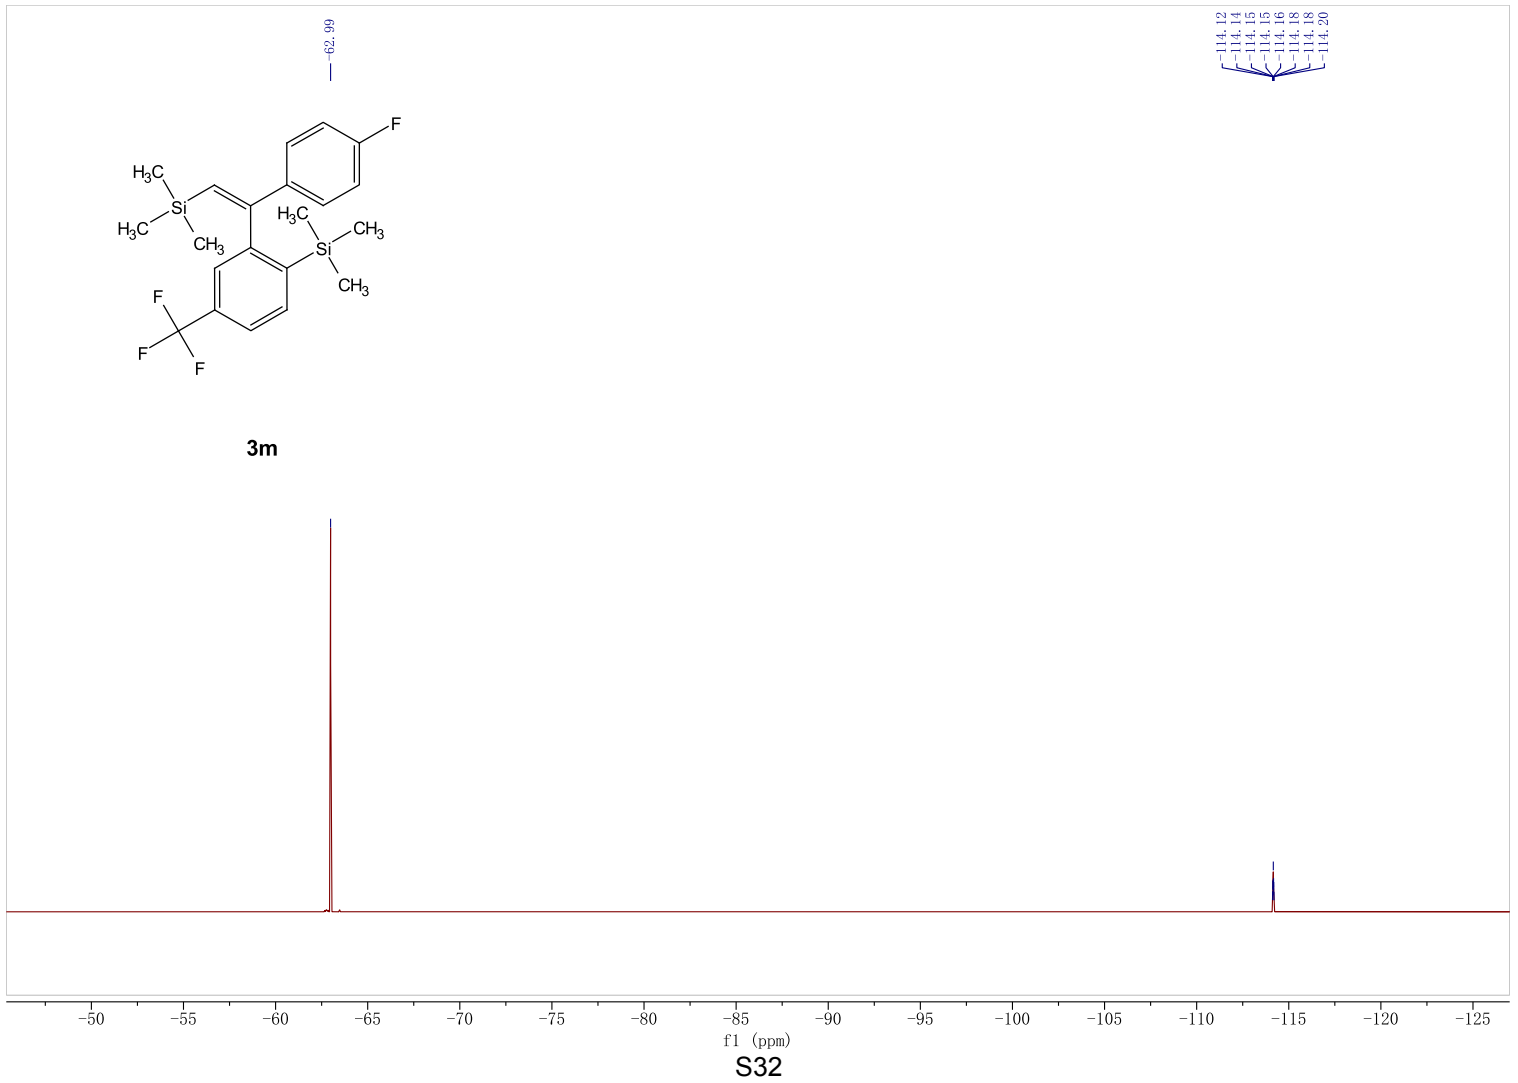



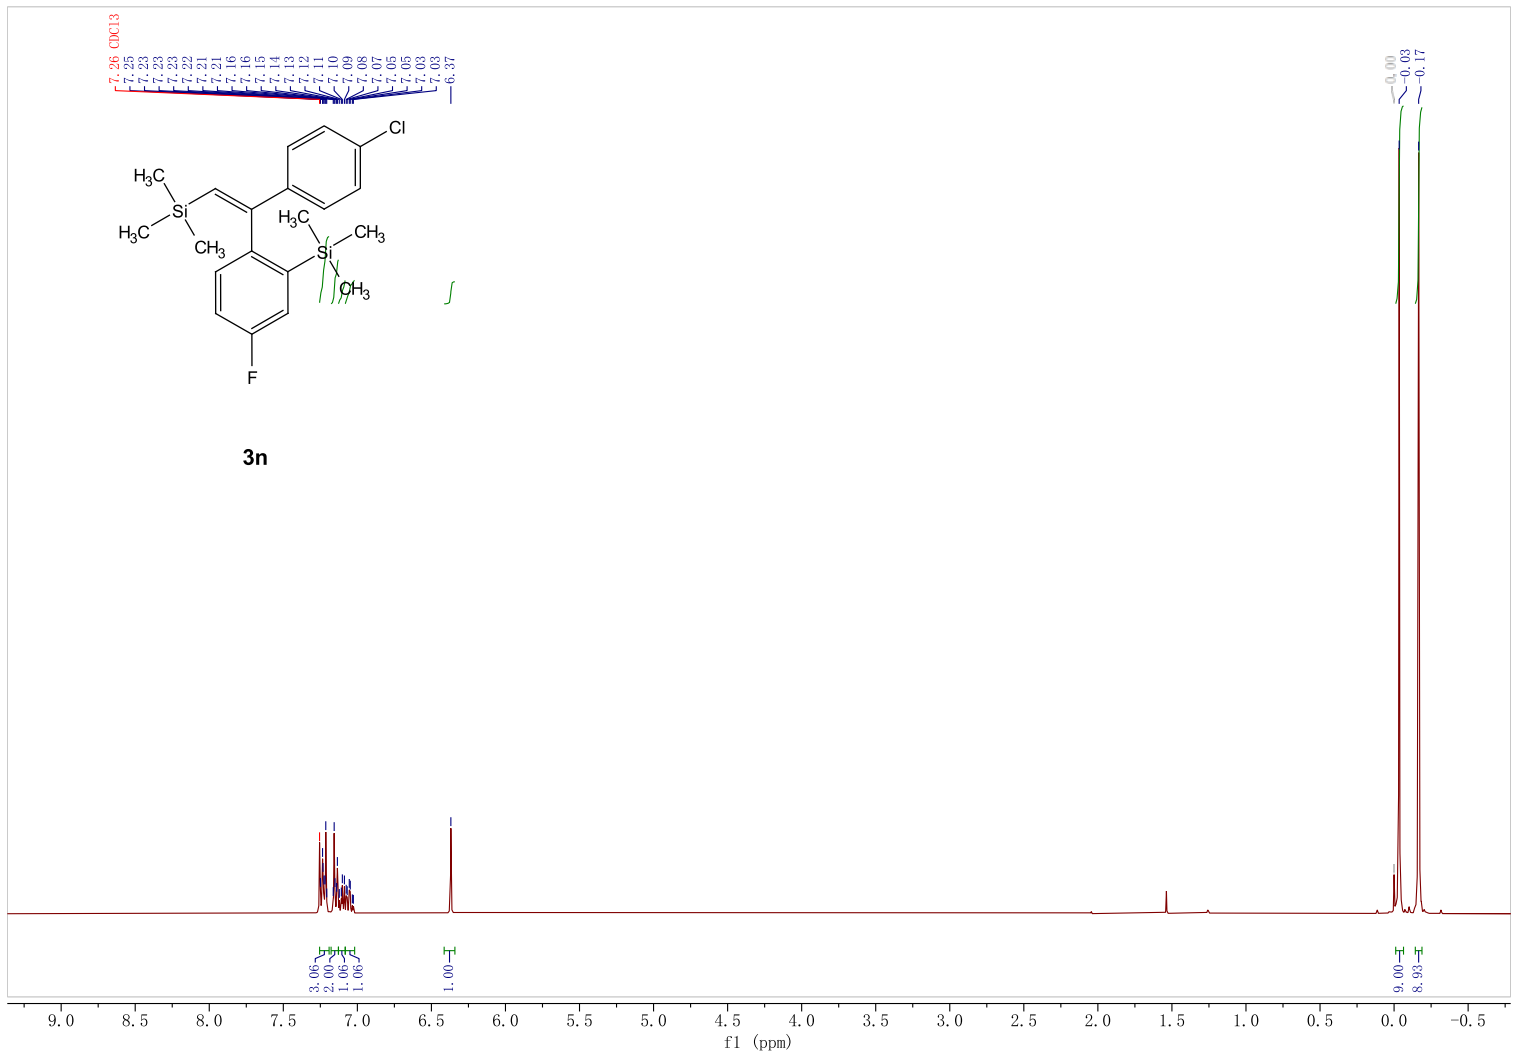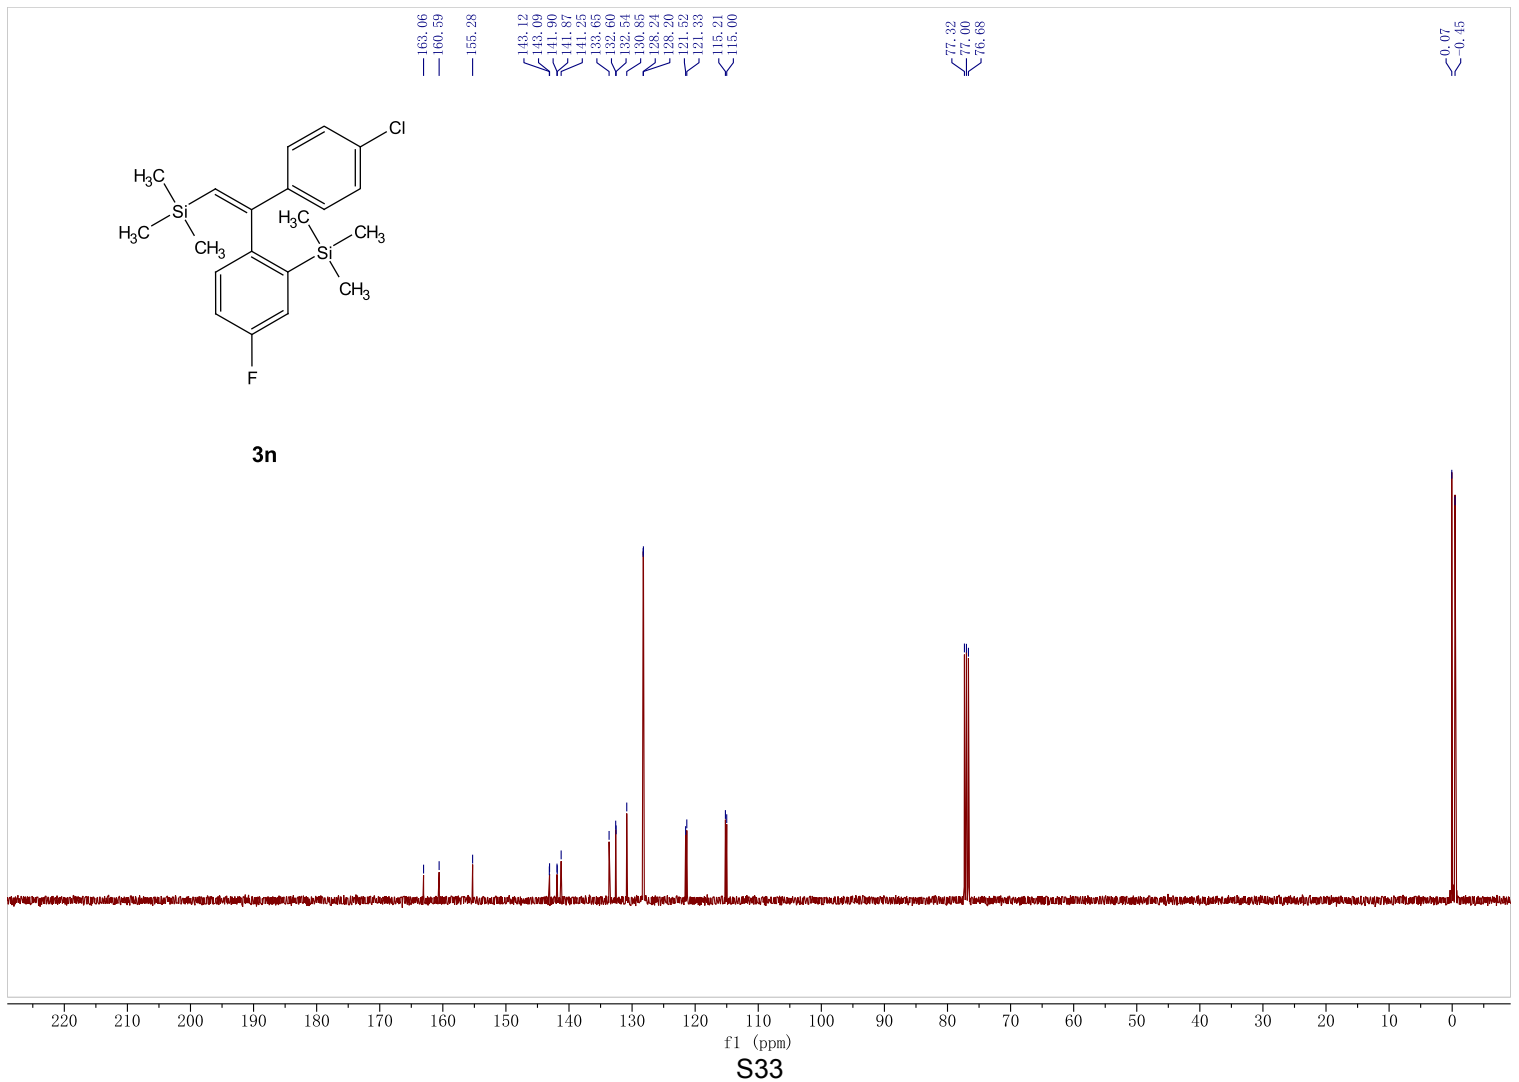



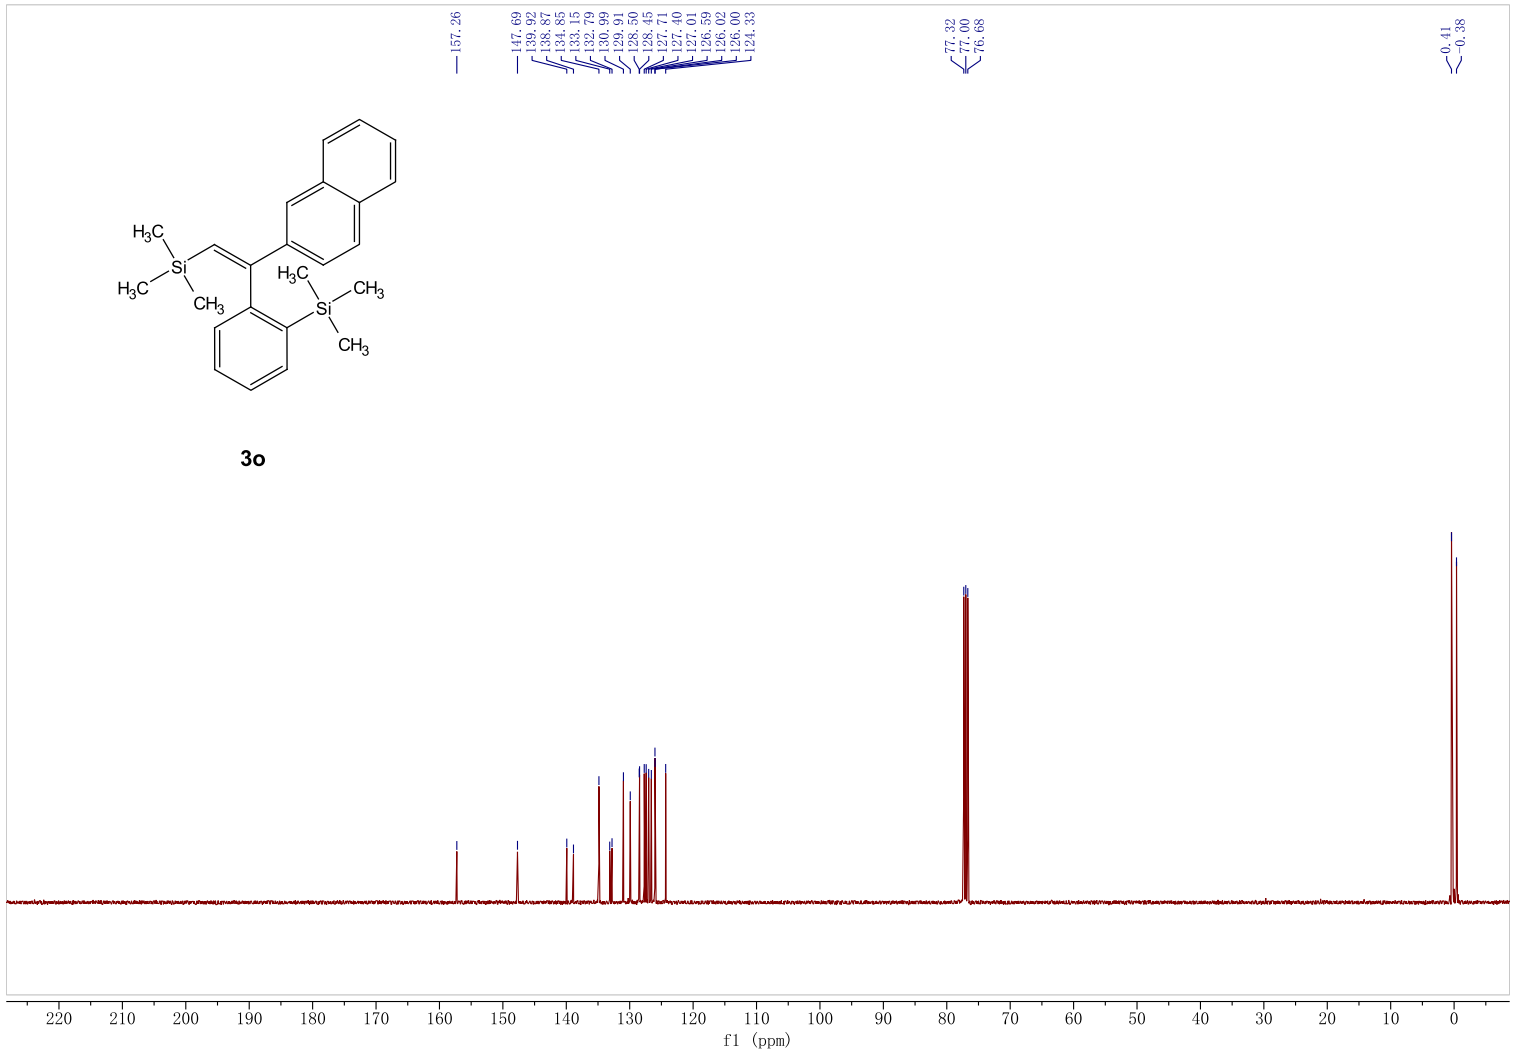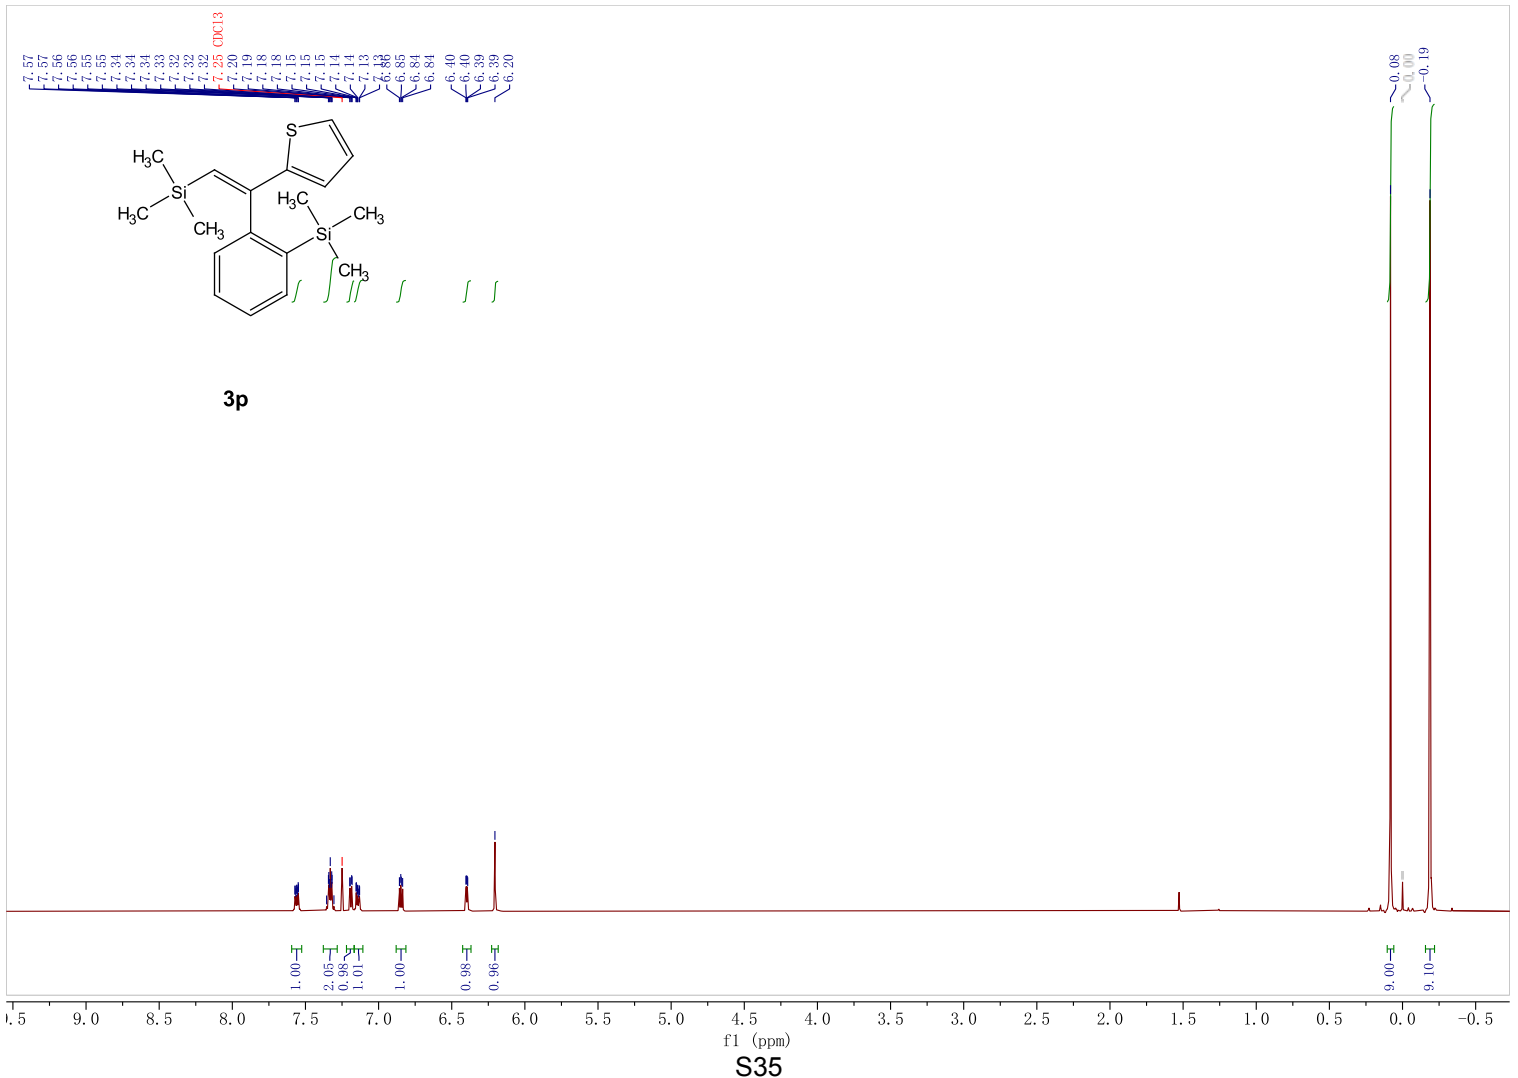

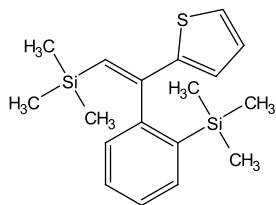

3p

151.35  
149.77  
146.79  
138.93  
136.74  
136.61  
128.33  
127.77  
127.36  
126.77  
125.61

77.32  
77.00  
76.68

0.49  
-0.40

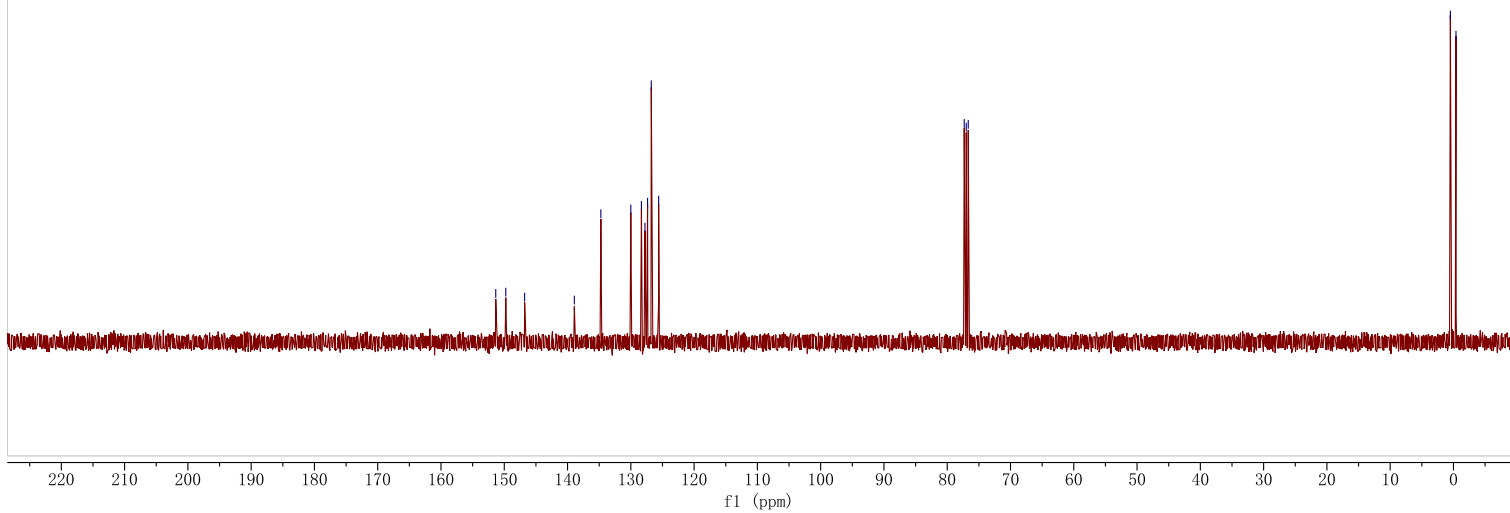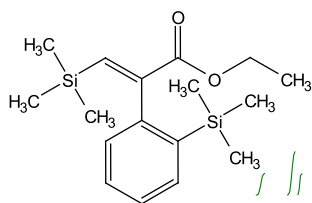

3q

7.54  
7.53  
7.52  
7.51  
7.50  
7.32  
7.31  
7.30  
7.29  
7.27  
7.26 CDCl3  
7.24  
7.04  
7.03  
7.02  
7.01  
7.00  
6.99

4.25  
4.23  
4.22  
4.21  
4.20  
4.19  
4.17  
4.16  
4.15  
4.13  
4.12  
4.11  
4.09

1.24  
1.22  
1.20

0.19  
-0.00  
-0.19

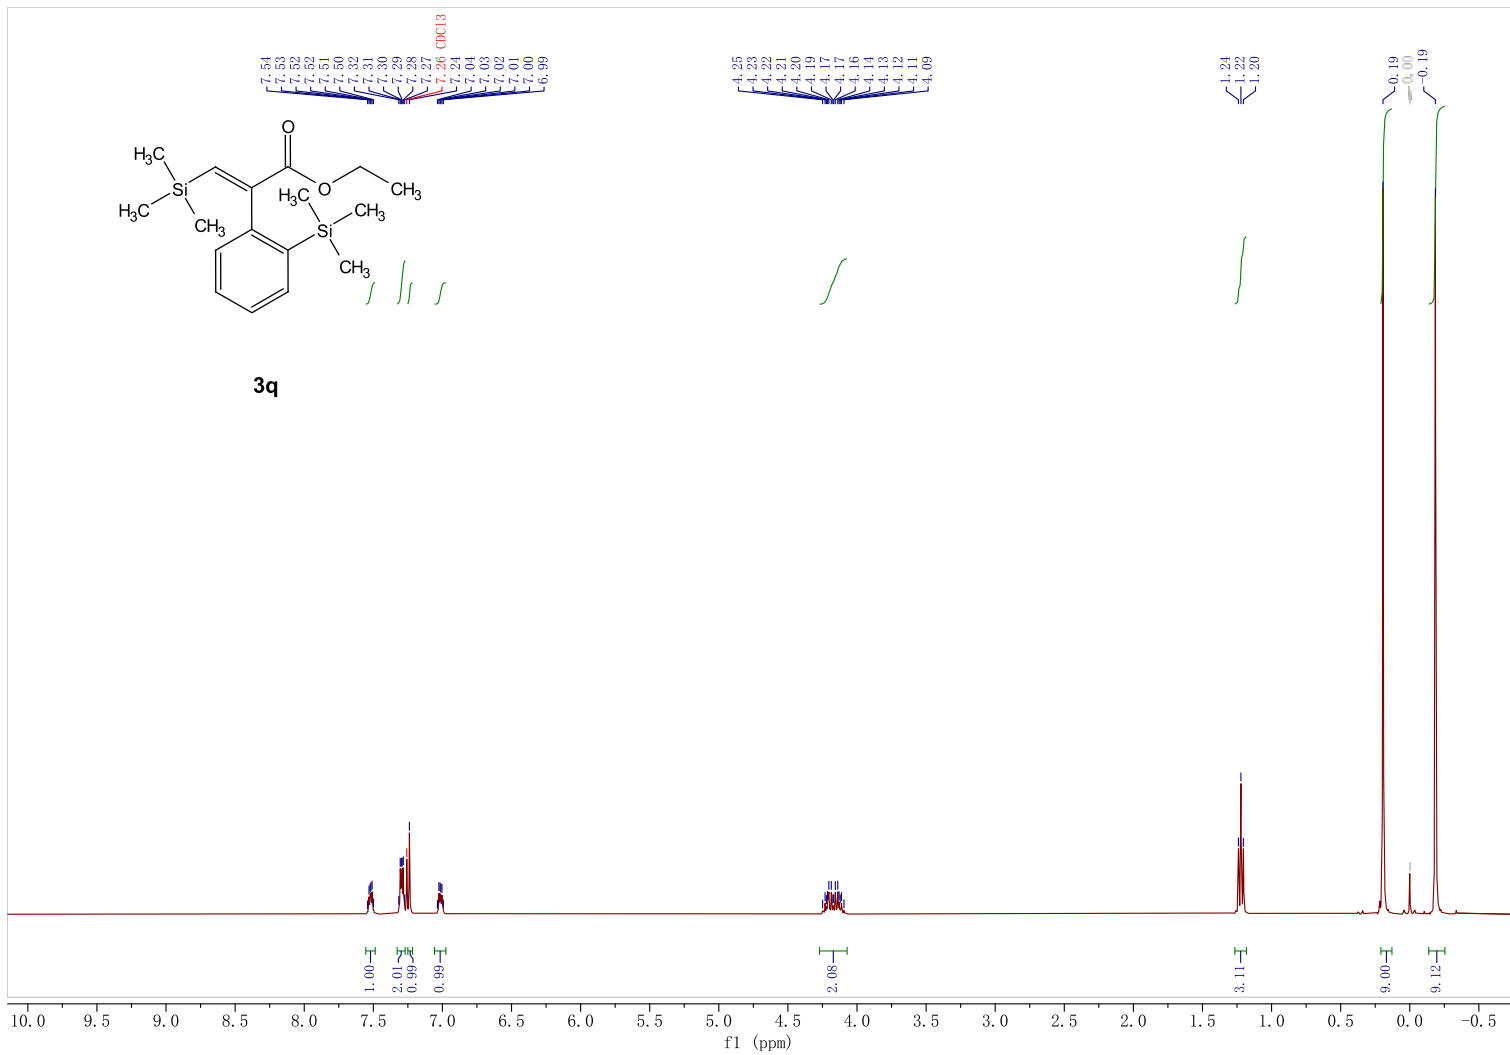

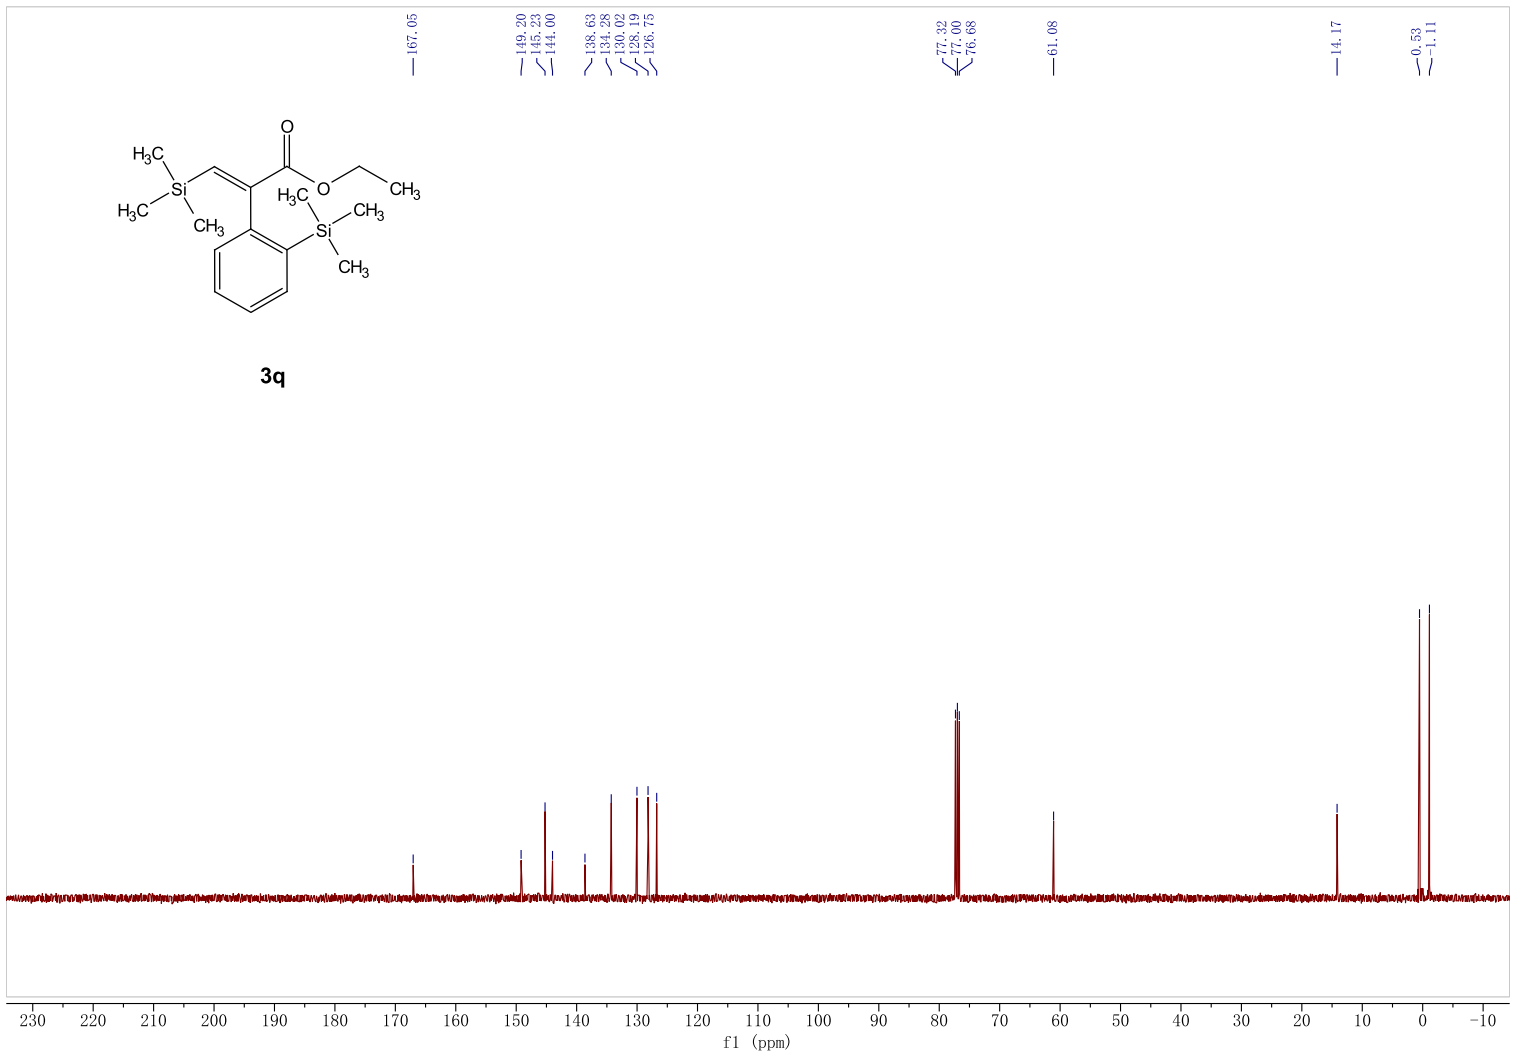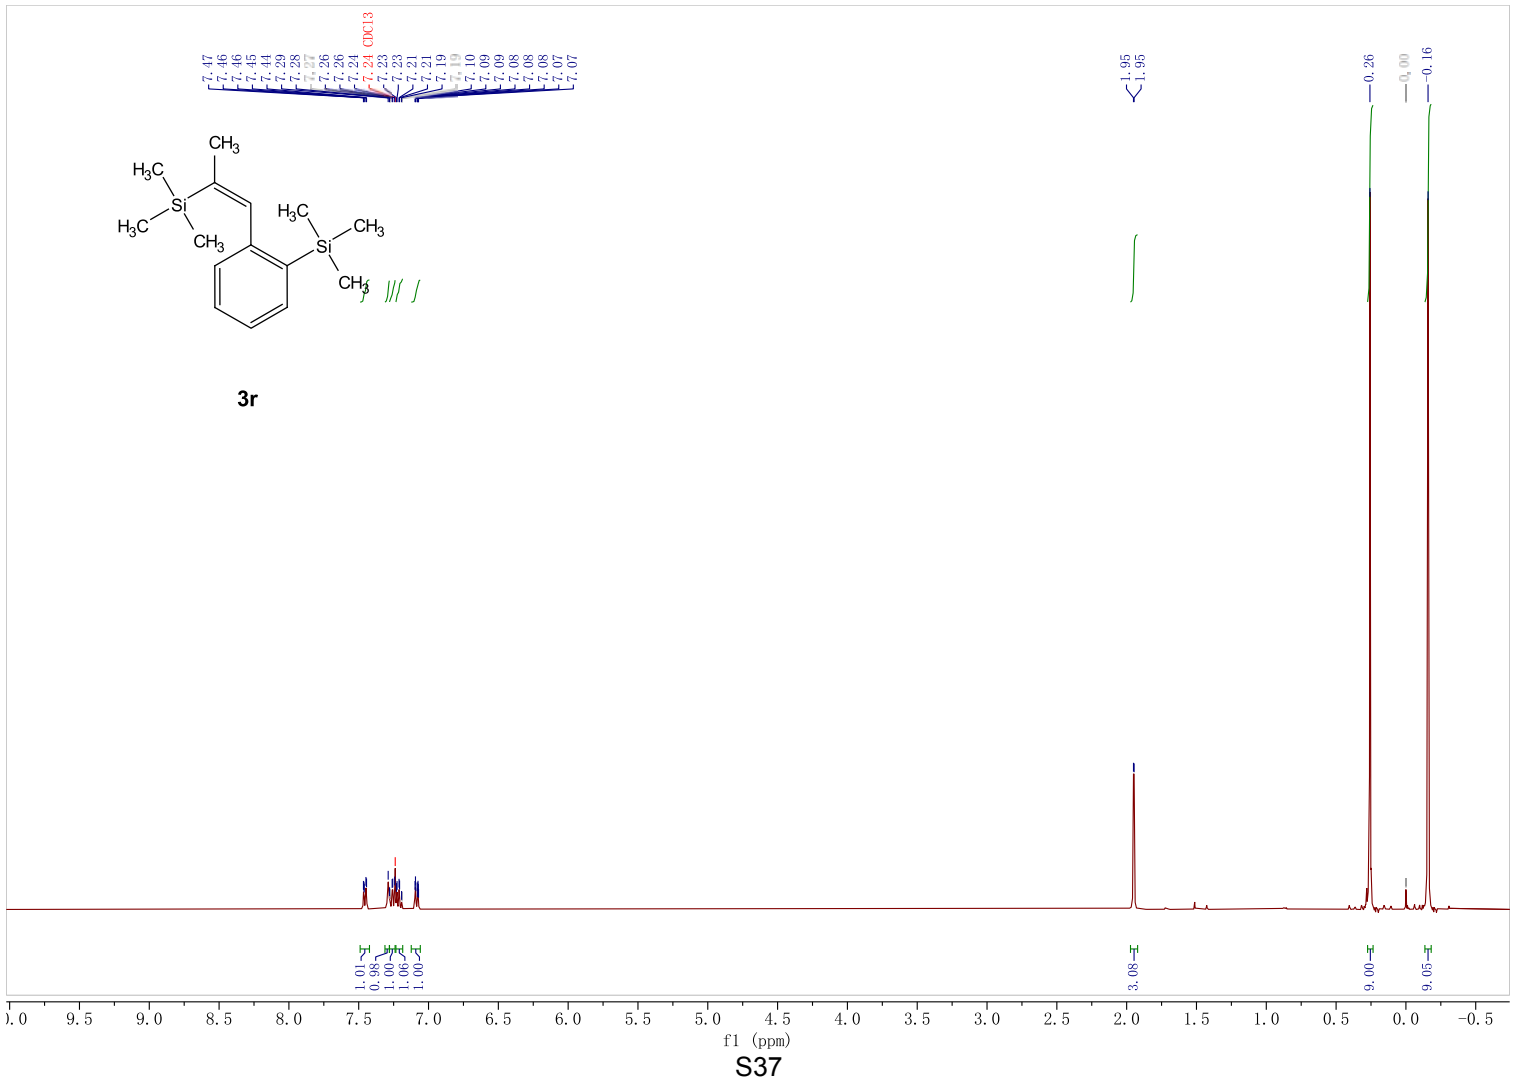

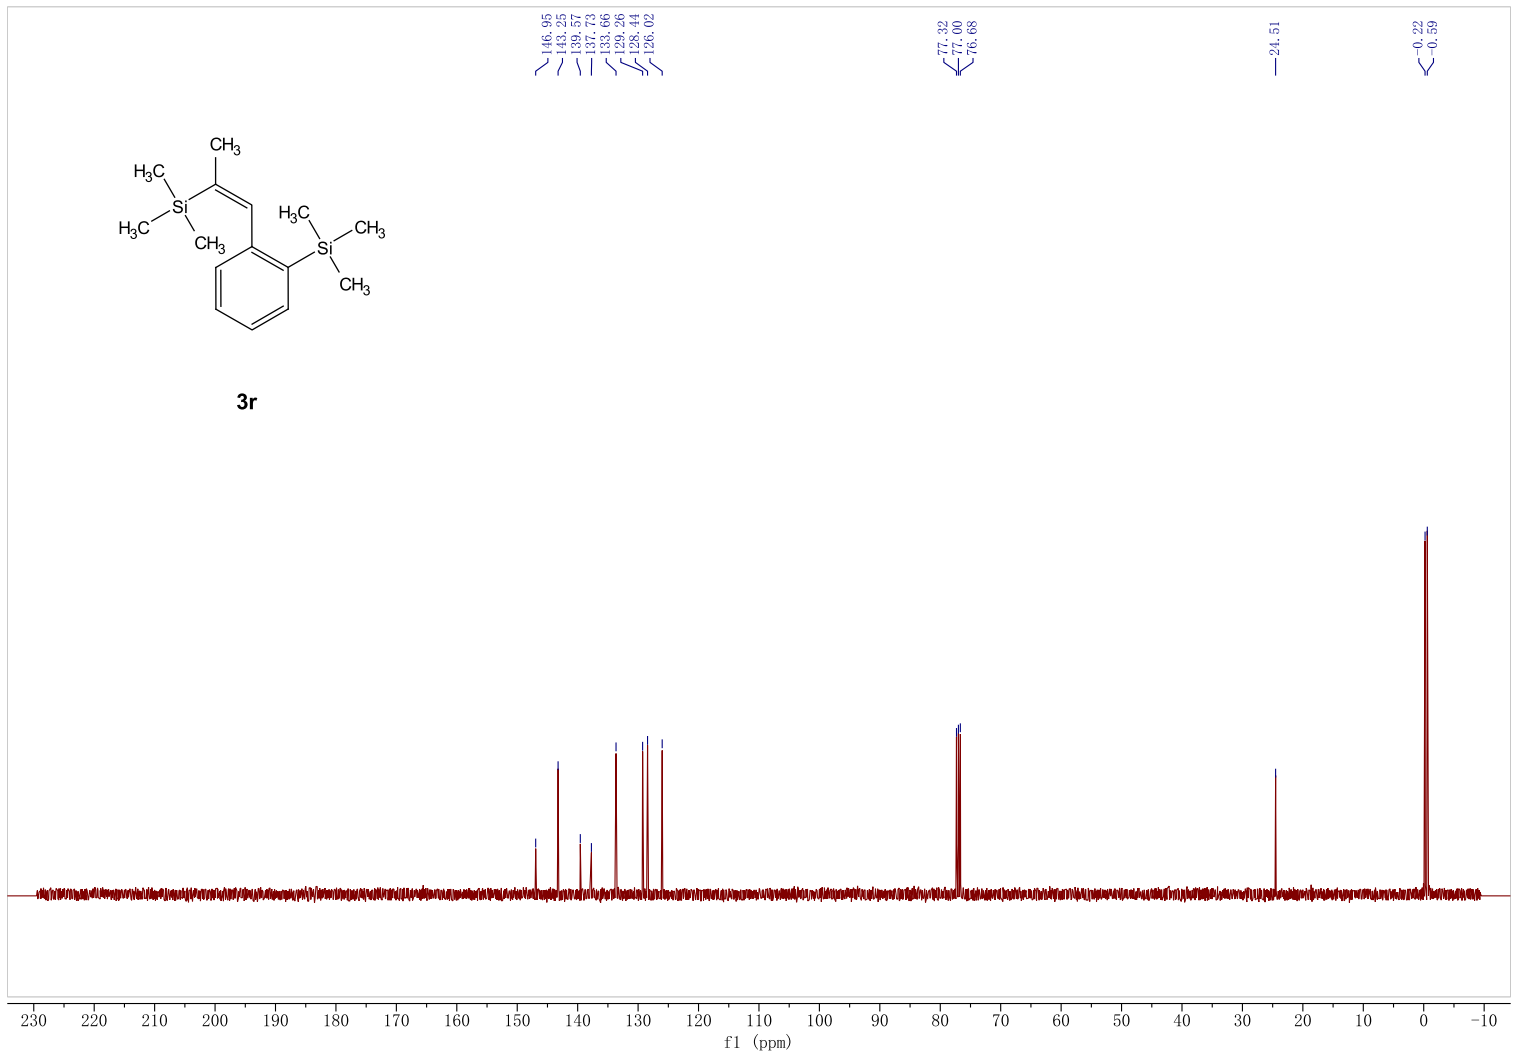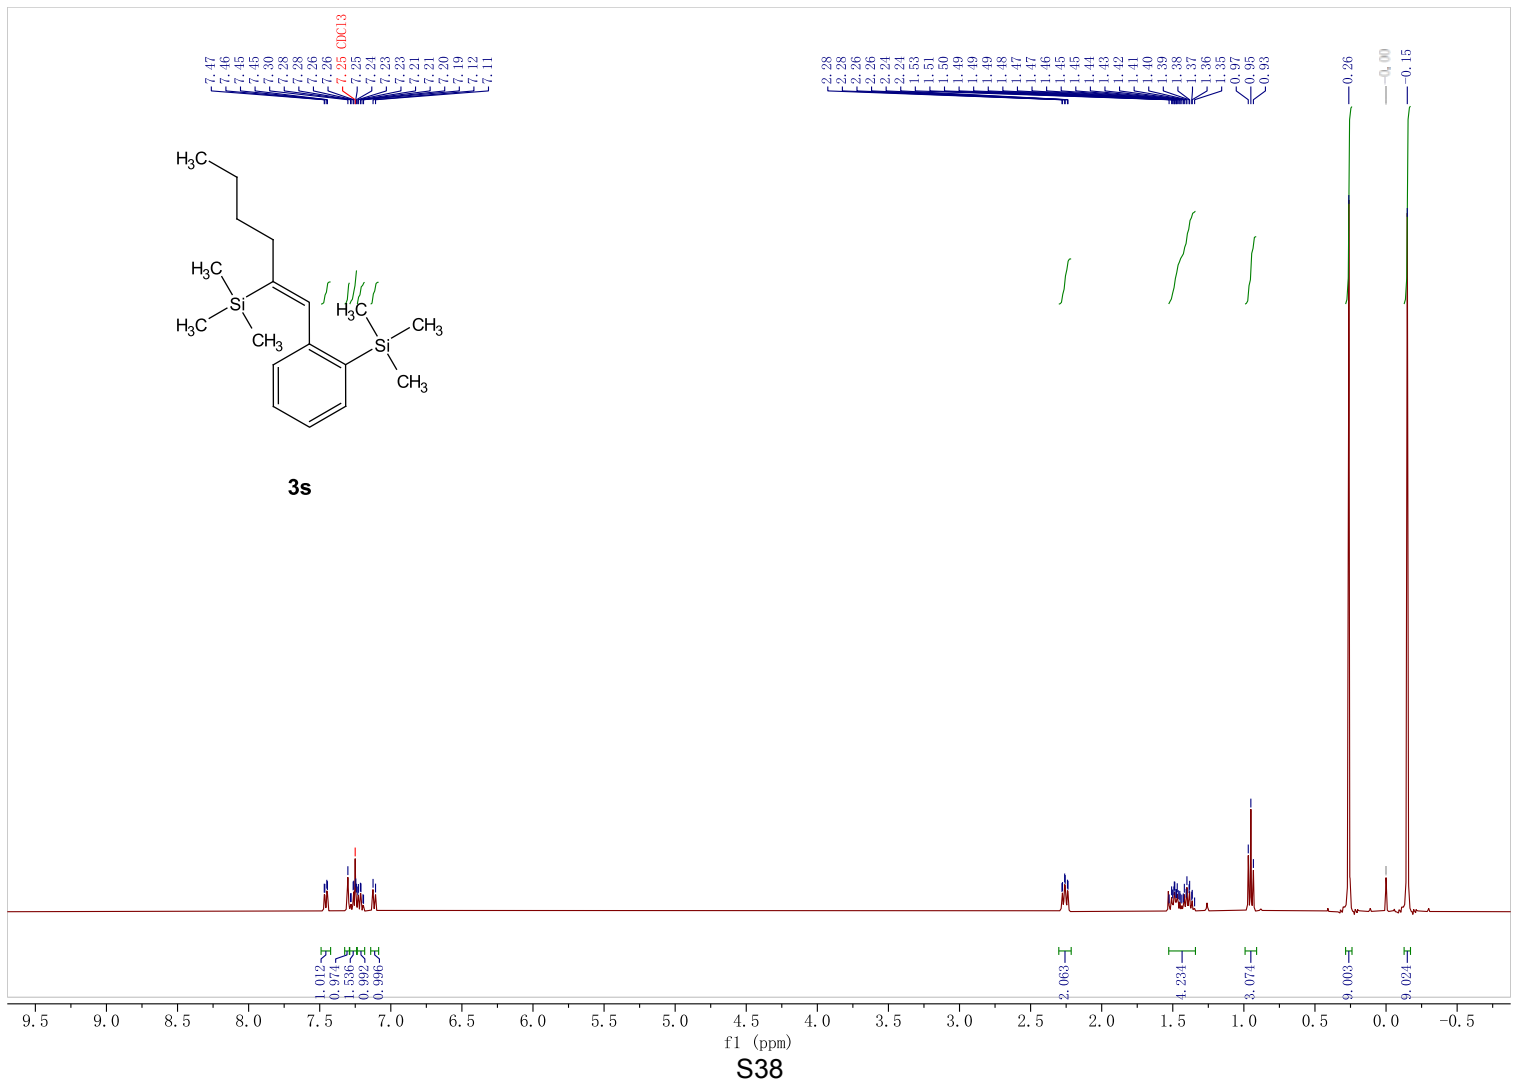

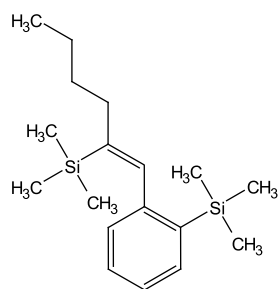

**3s**

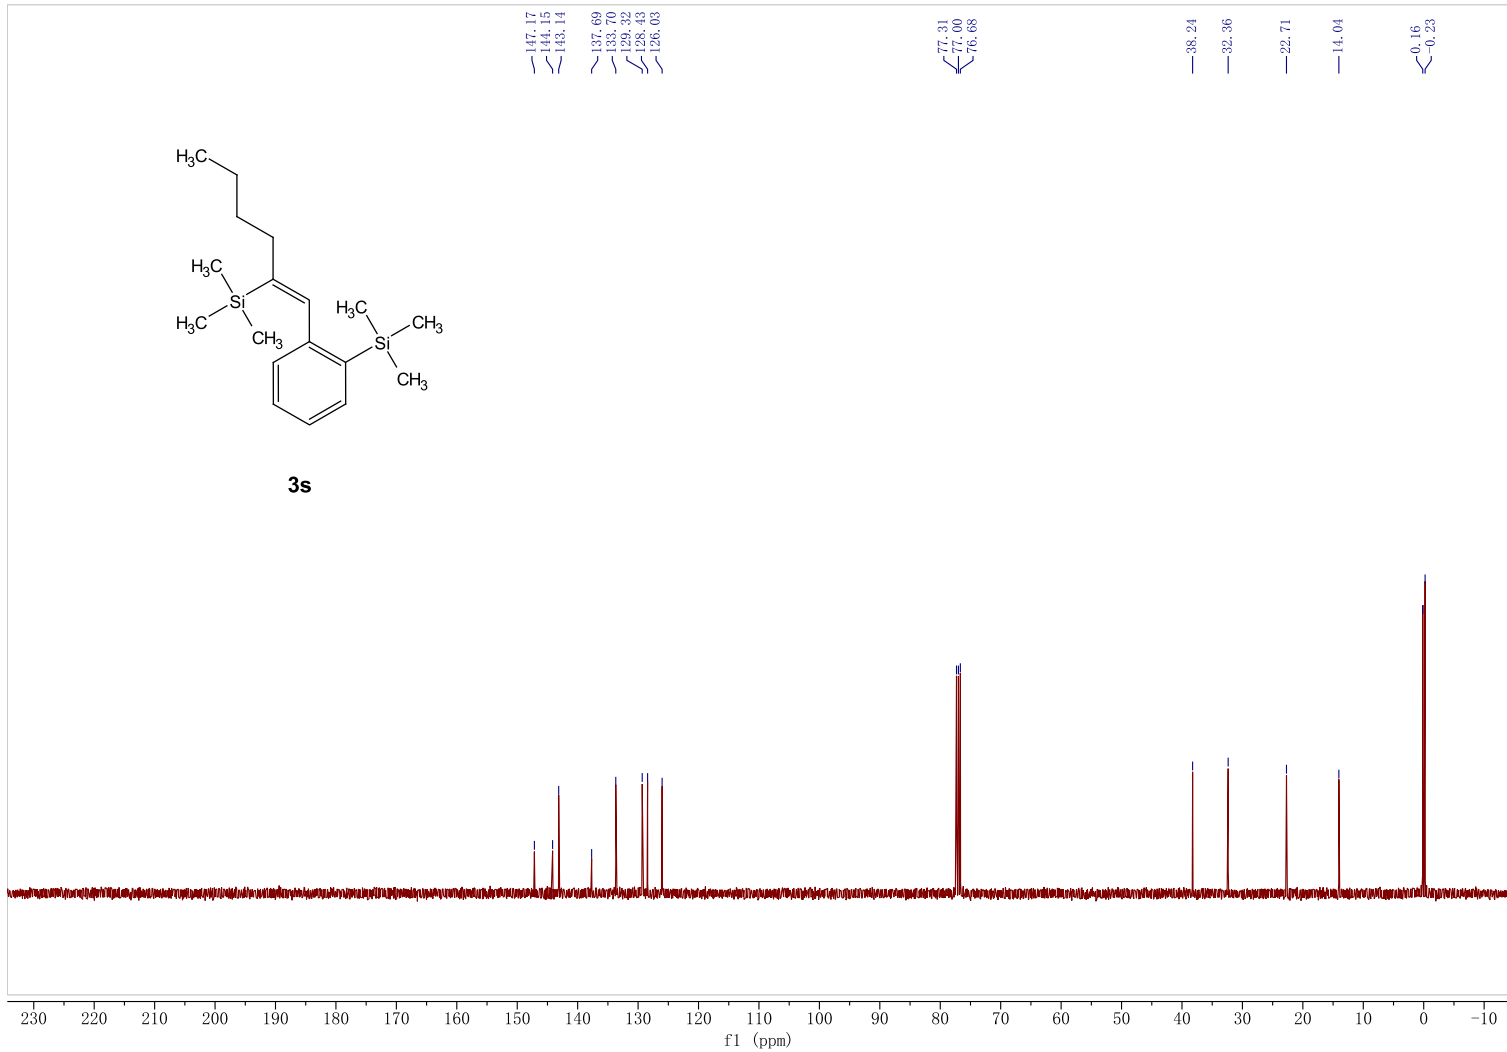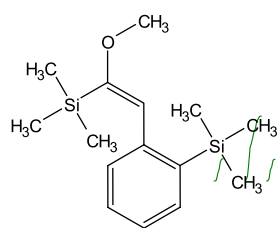

**3t**

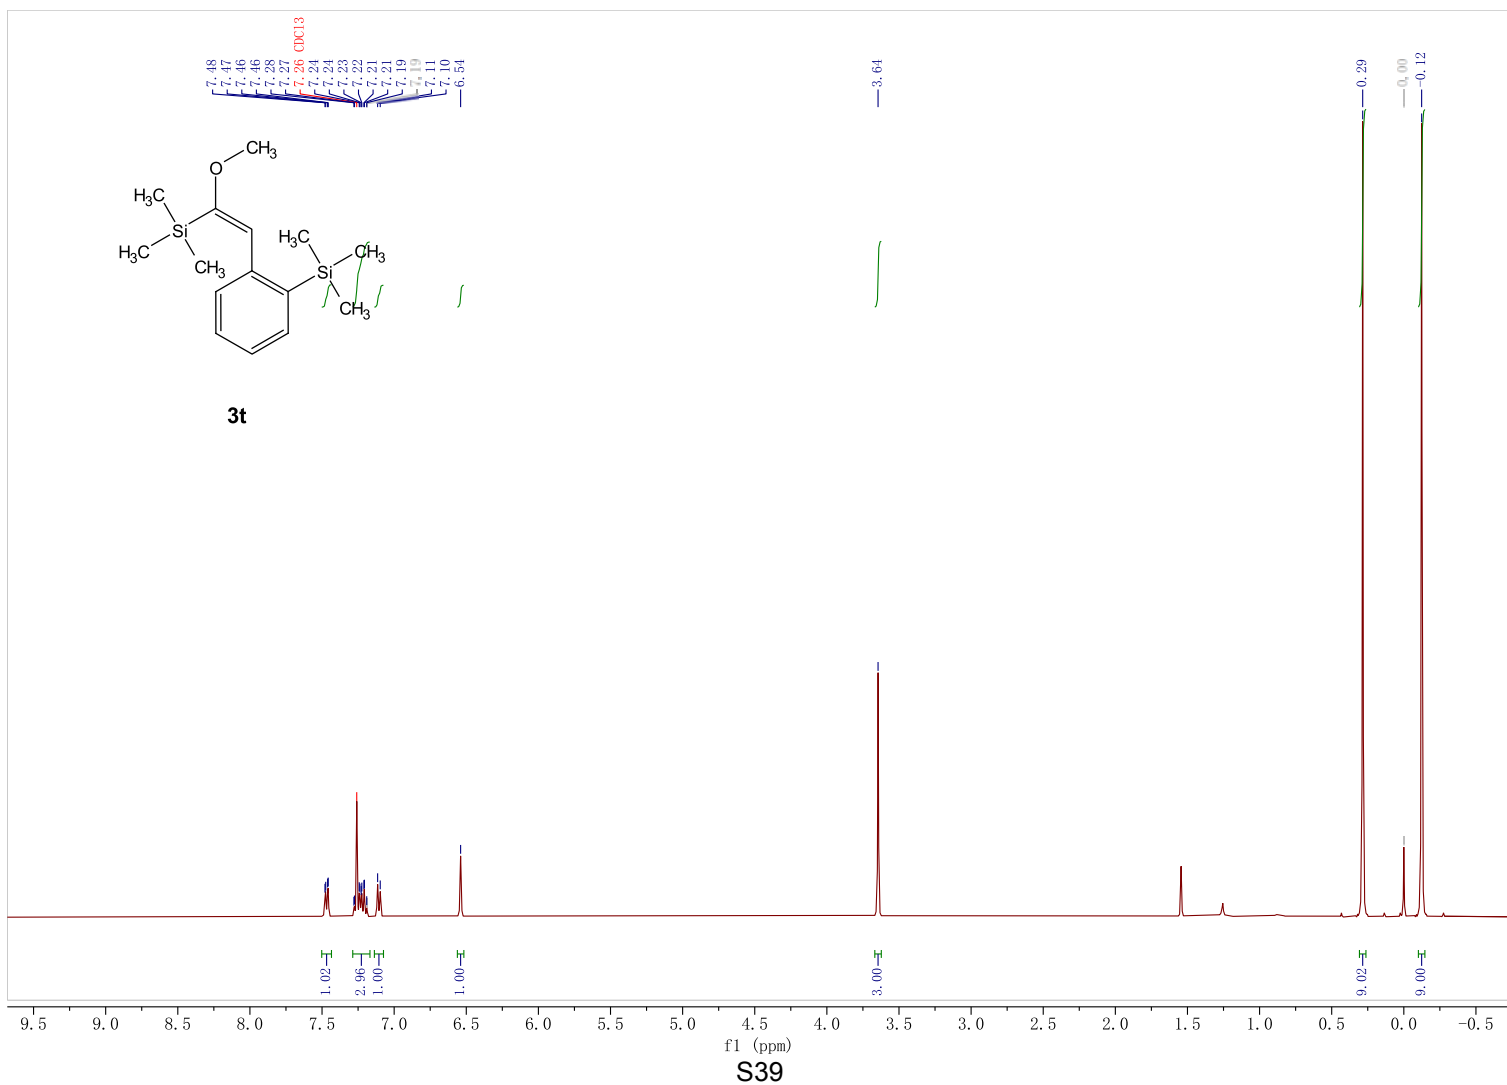

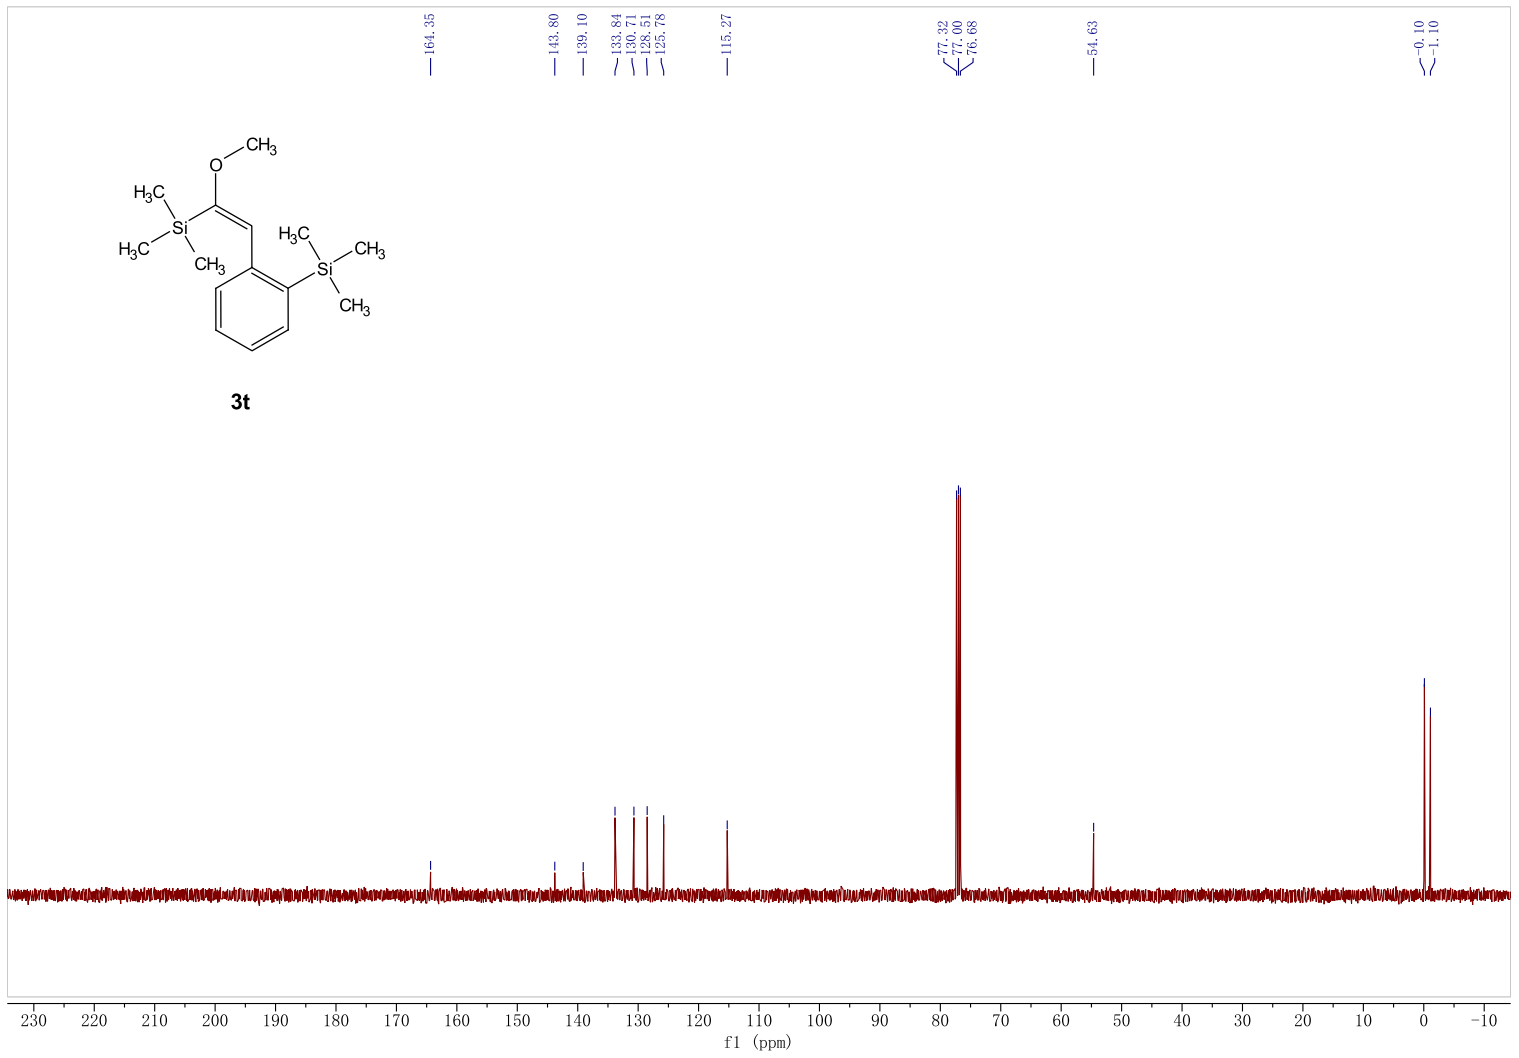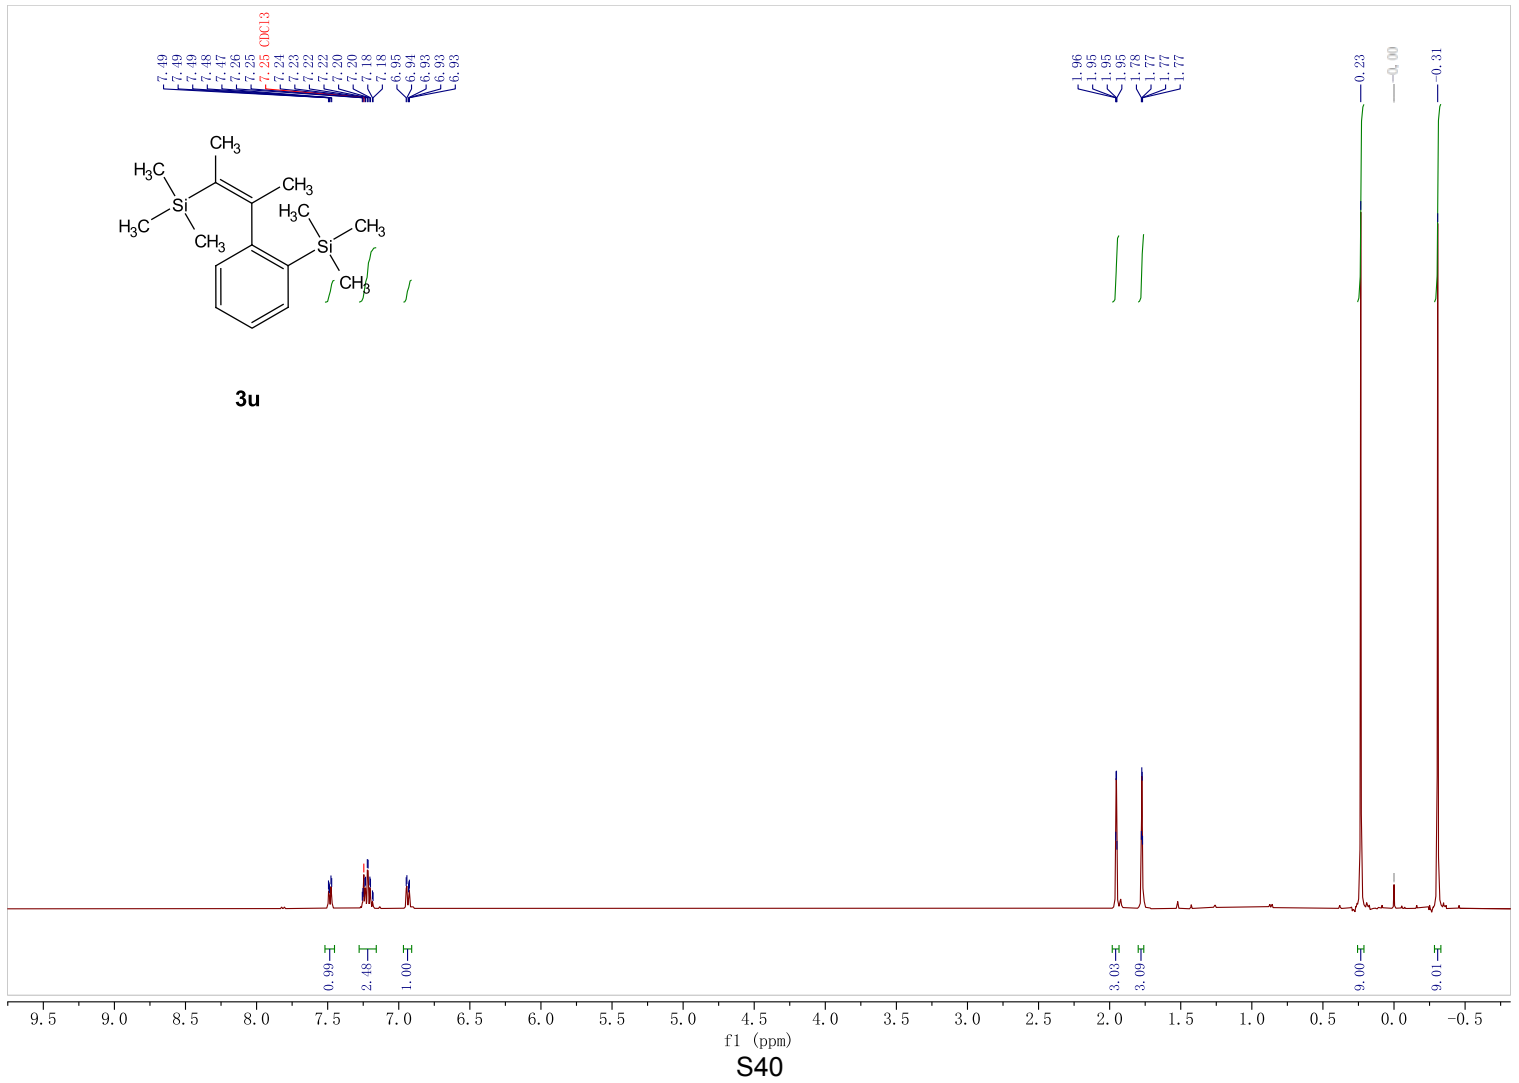



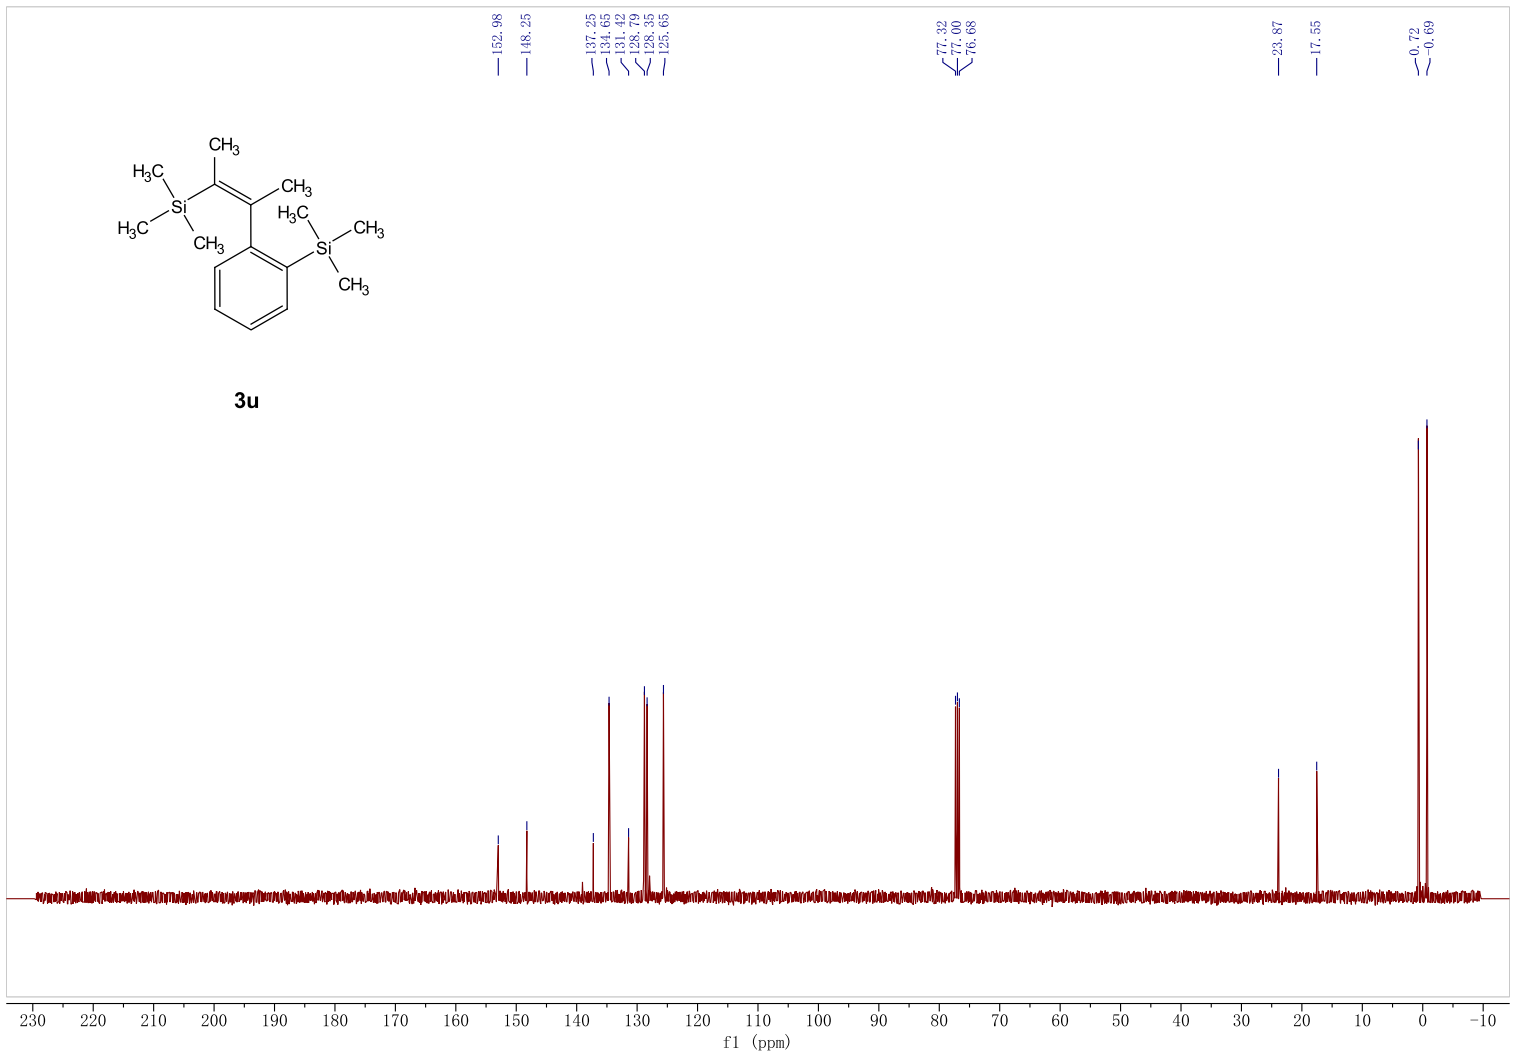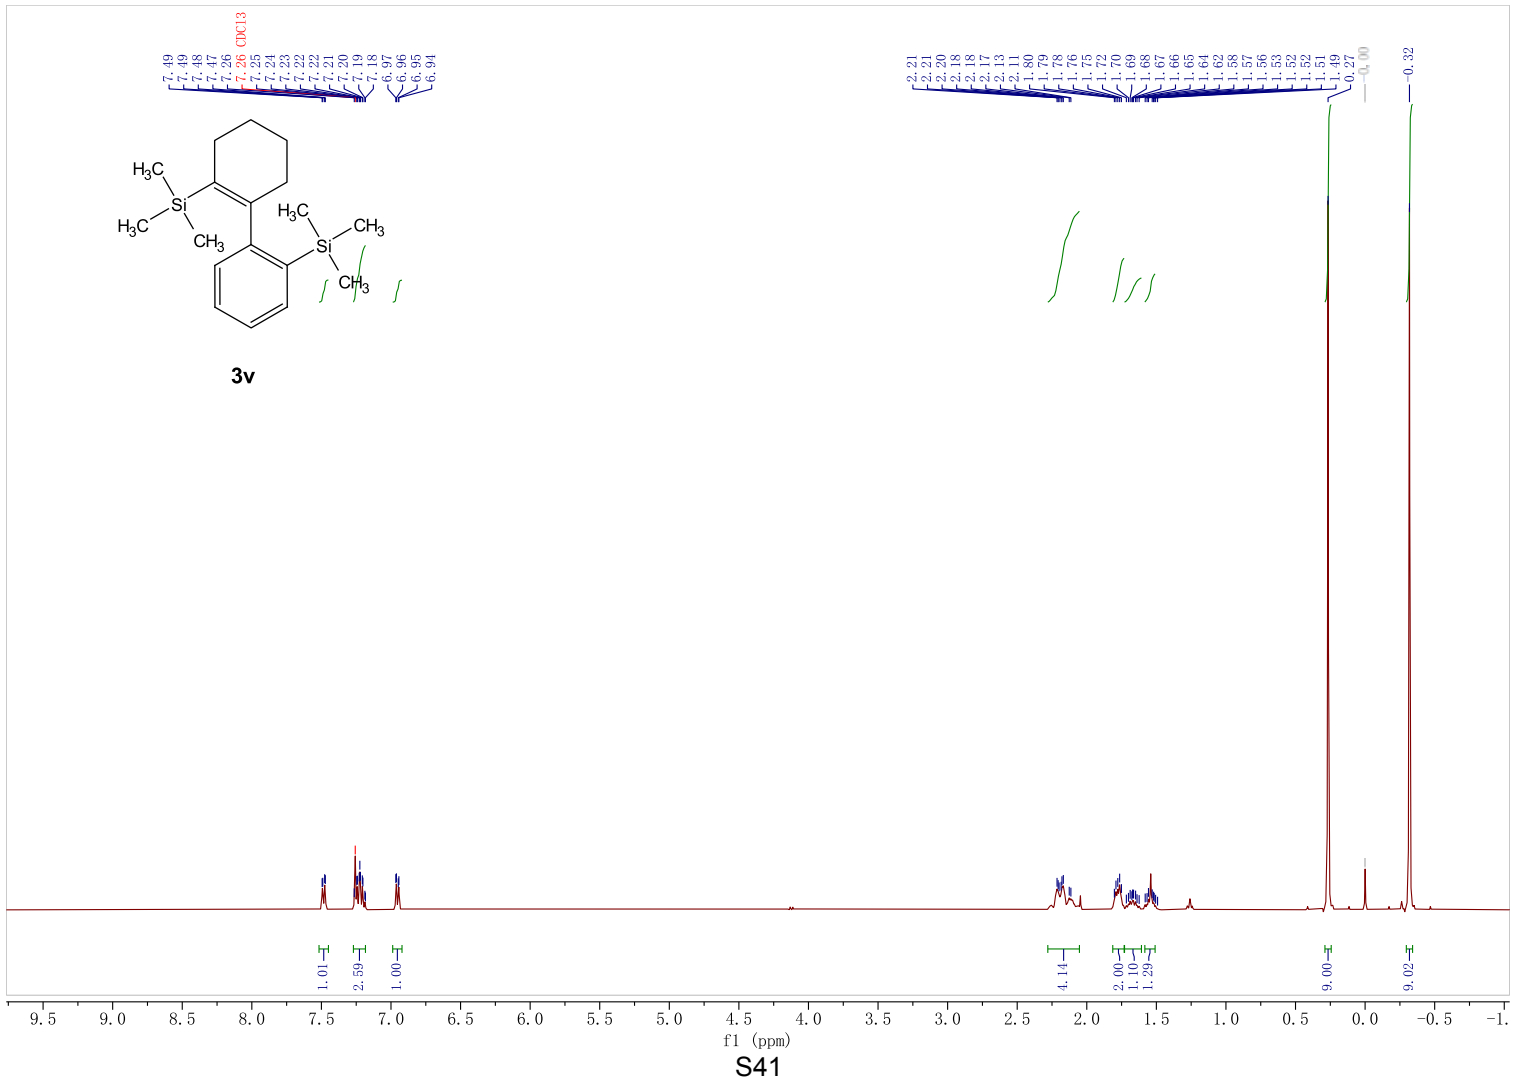

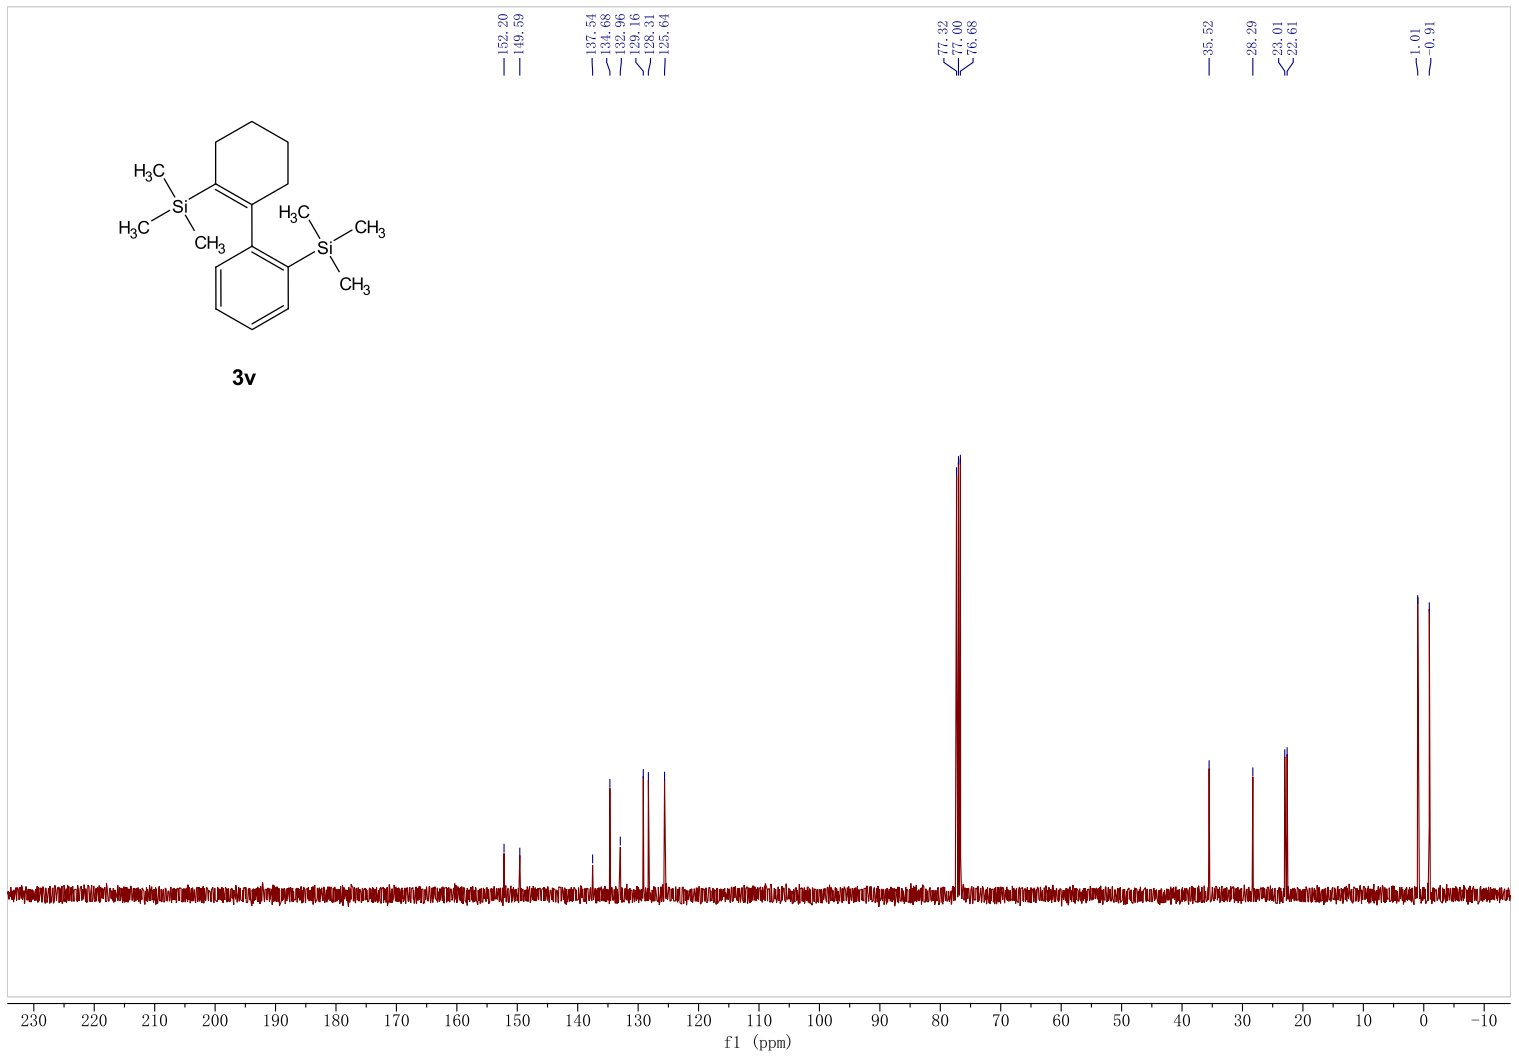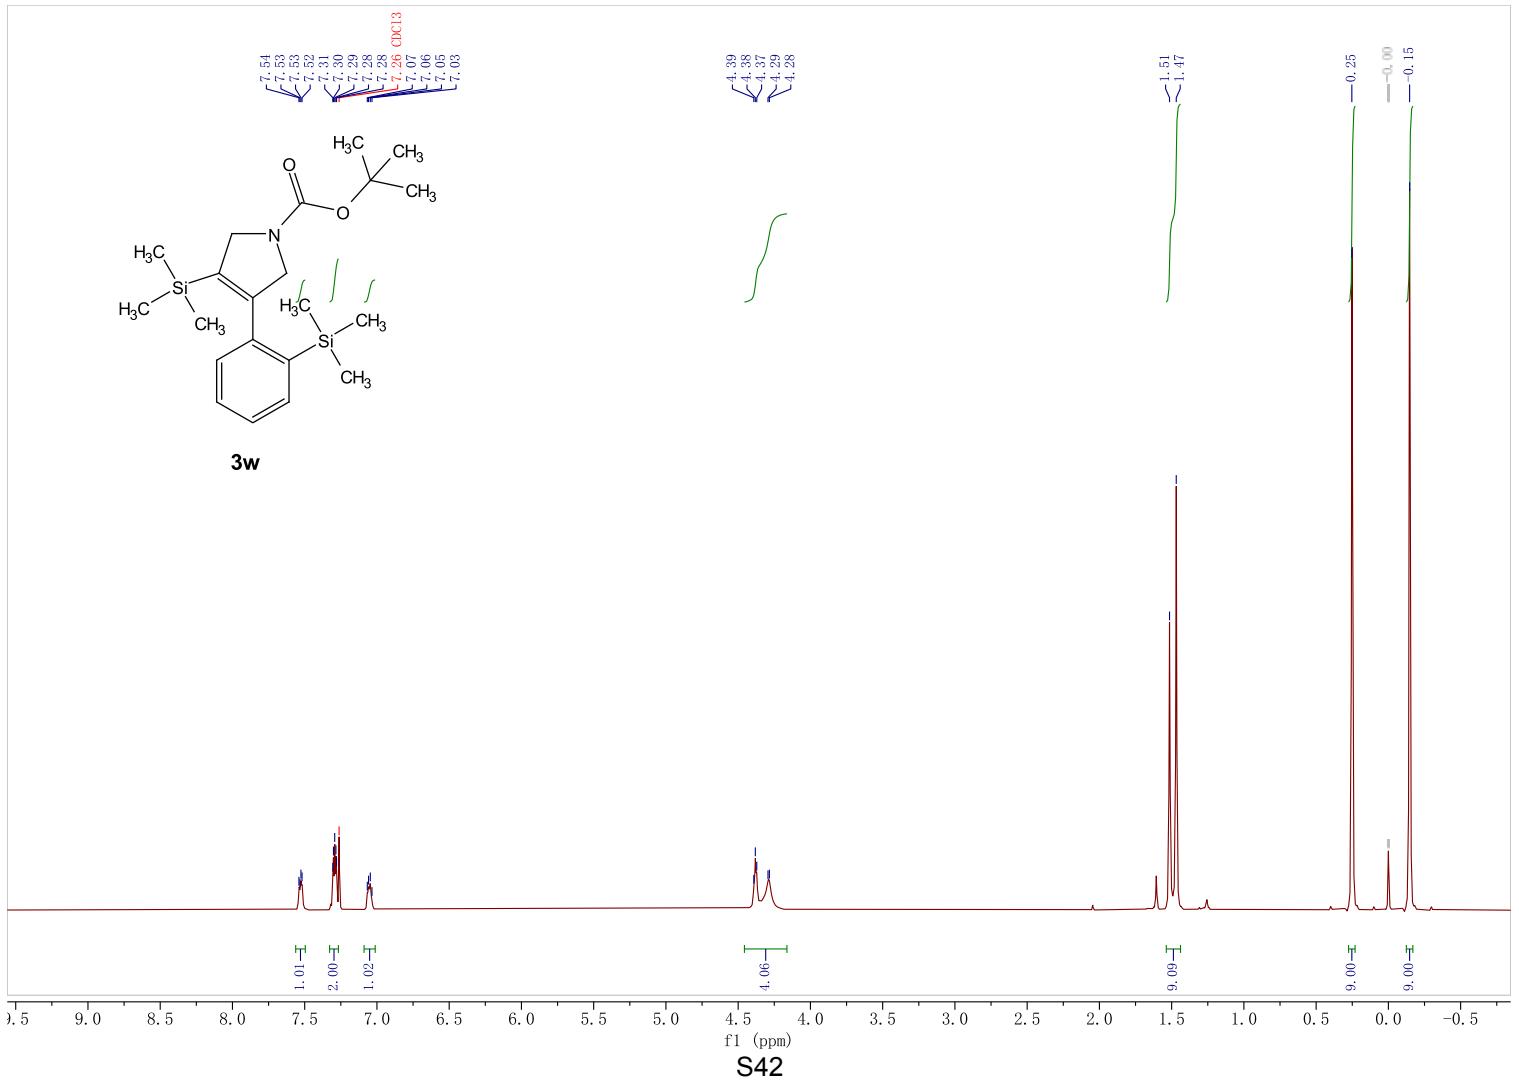

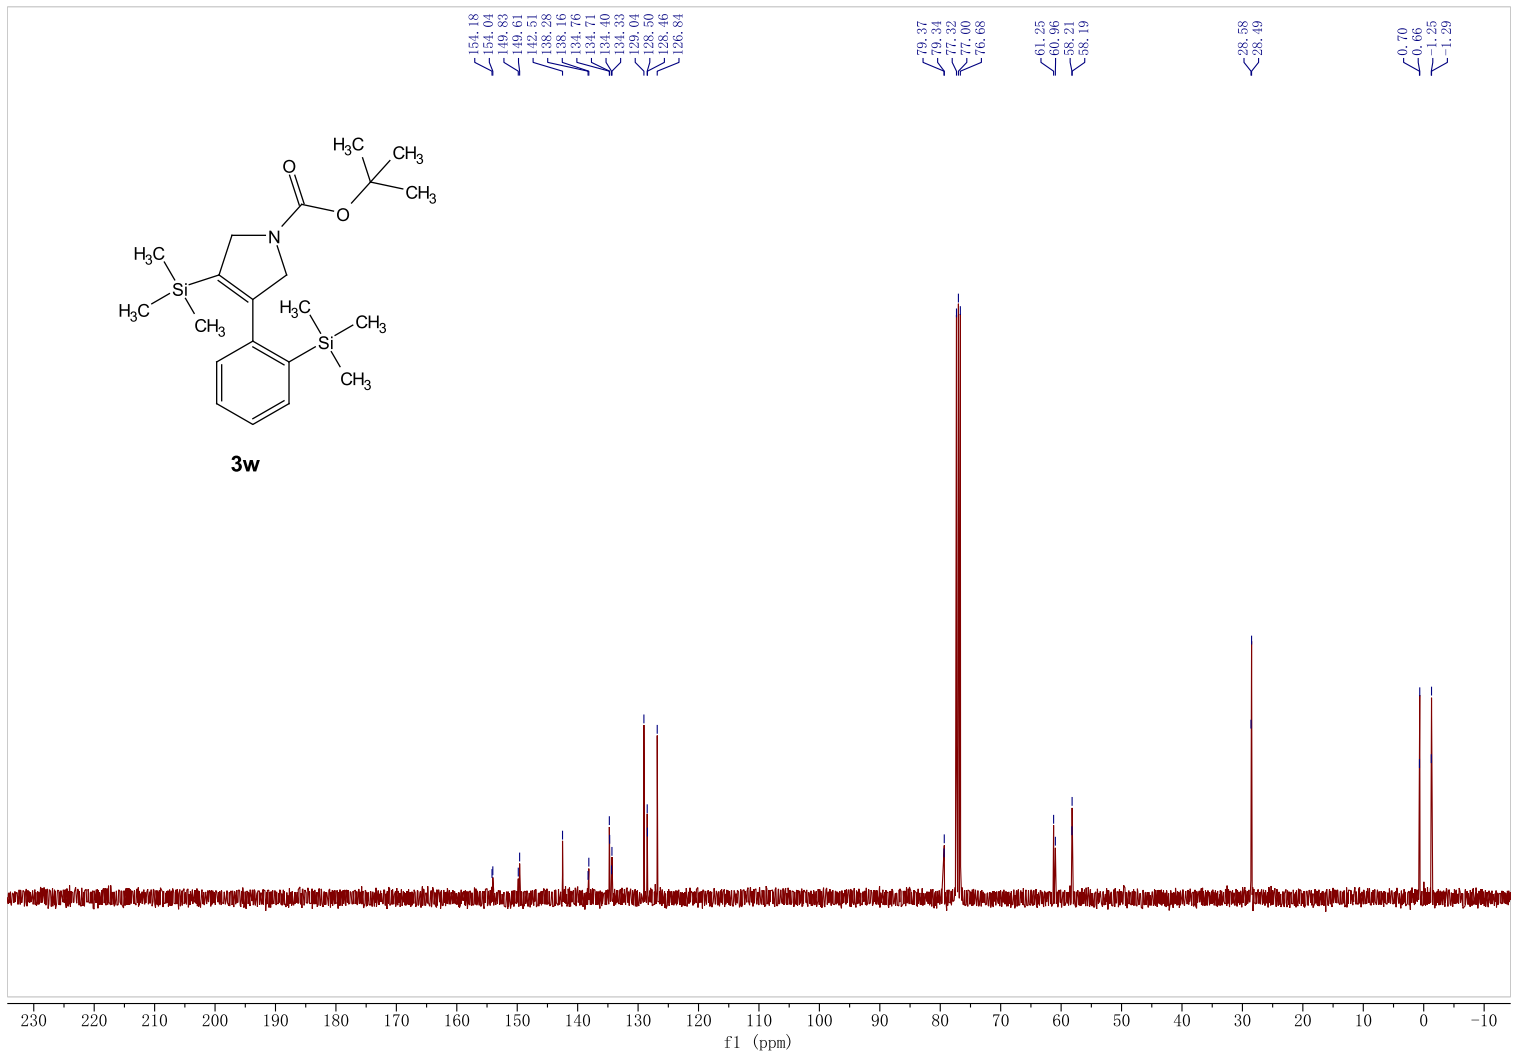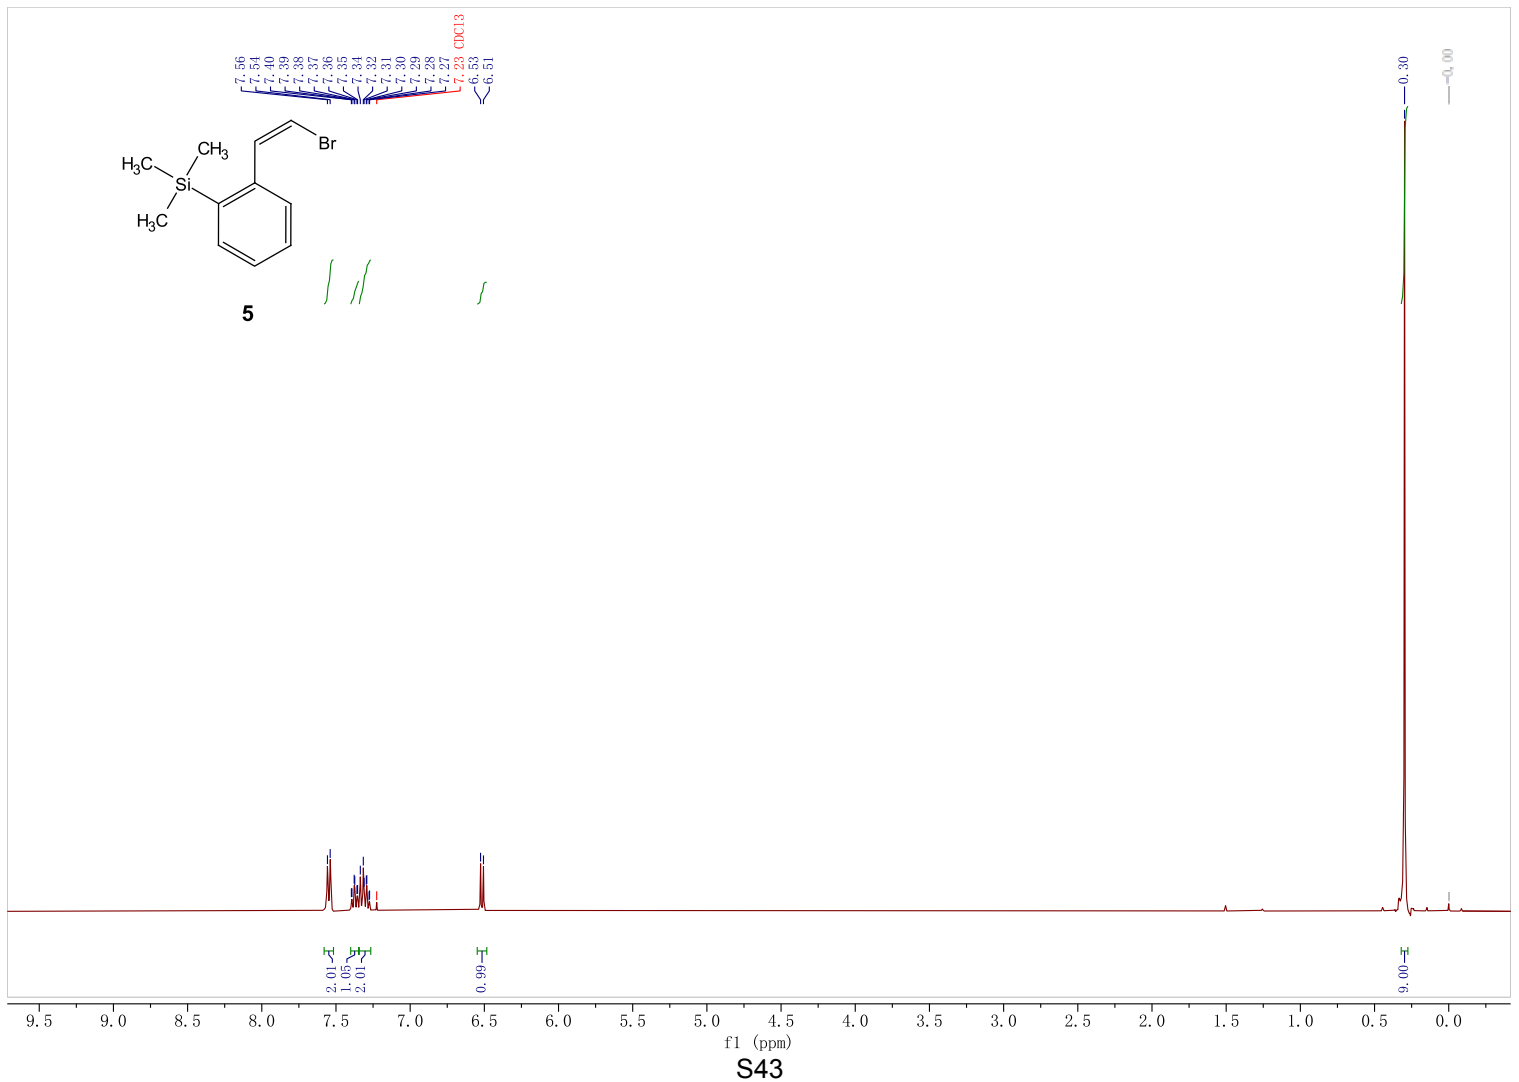

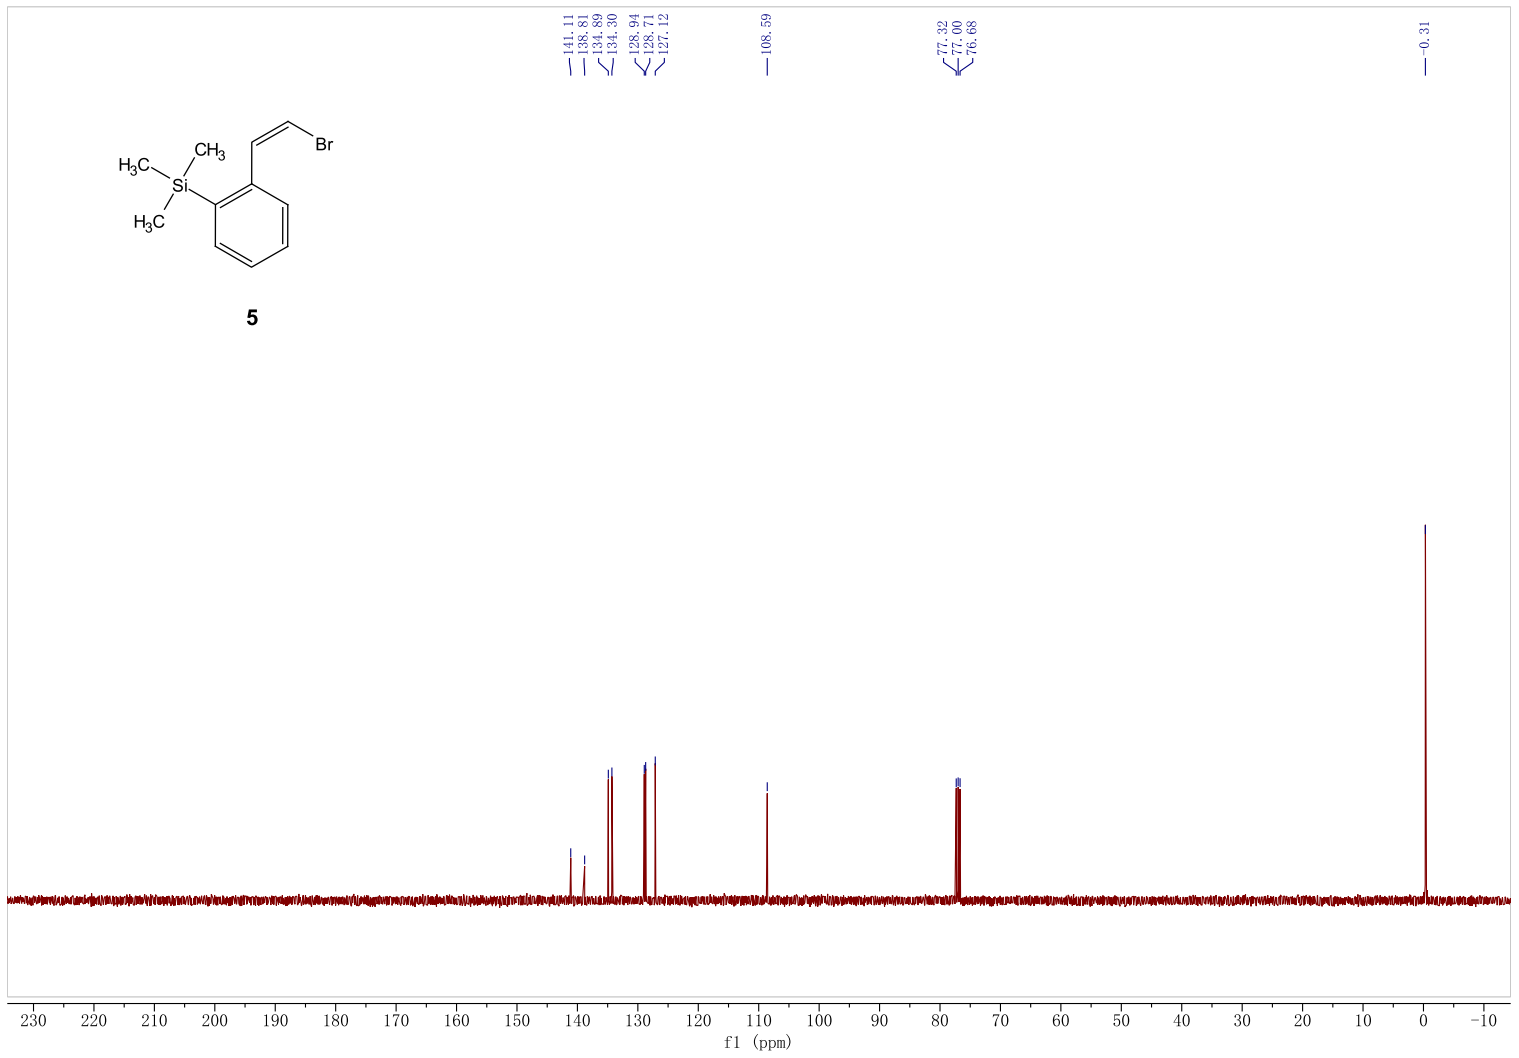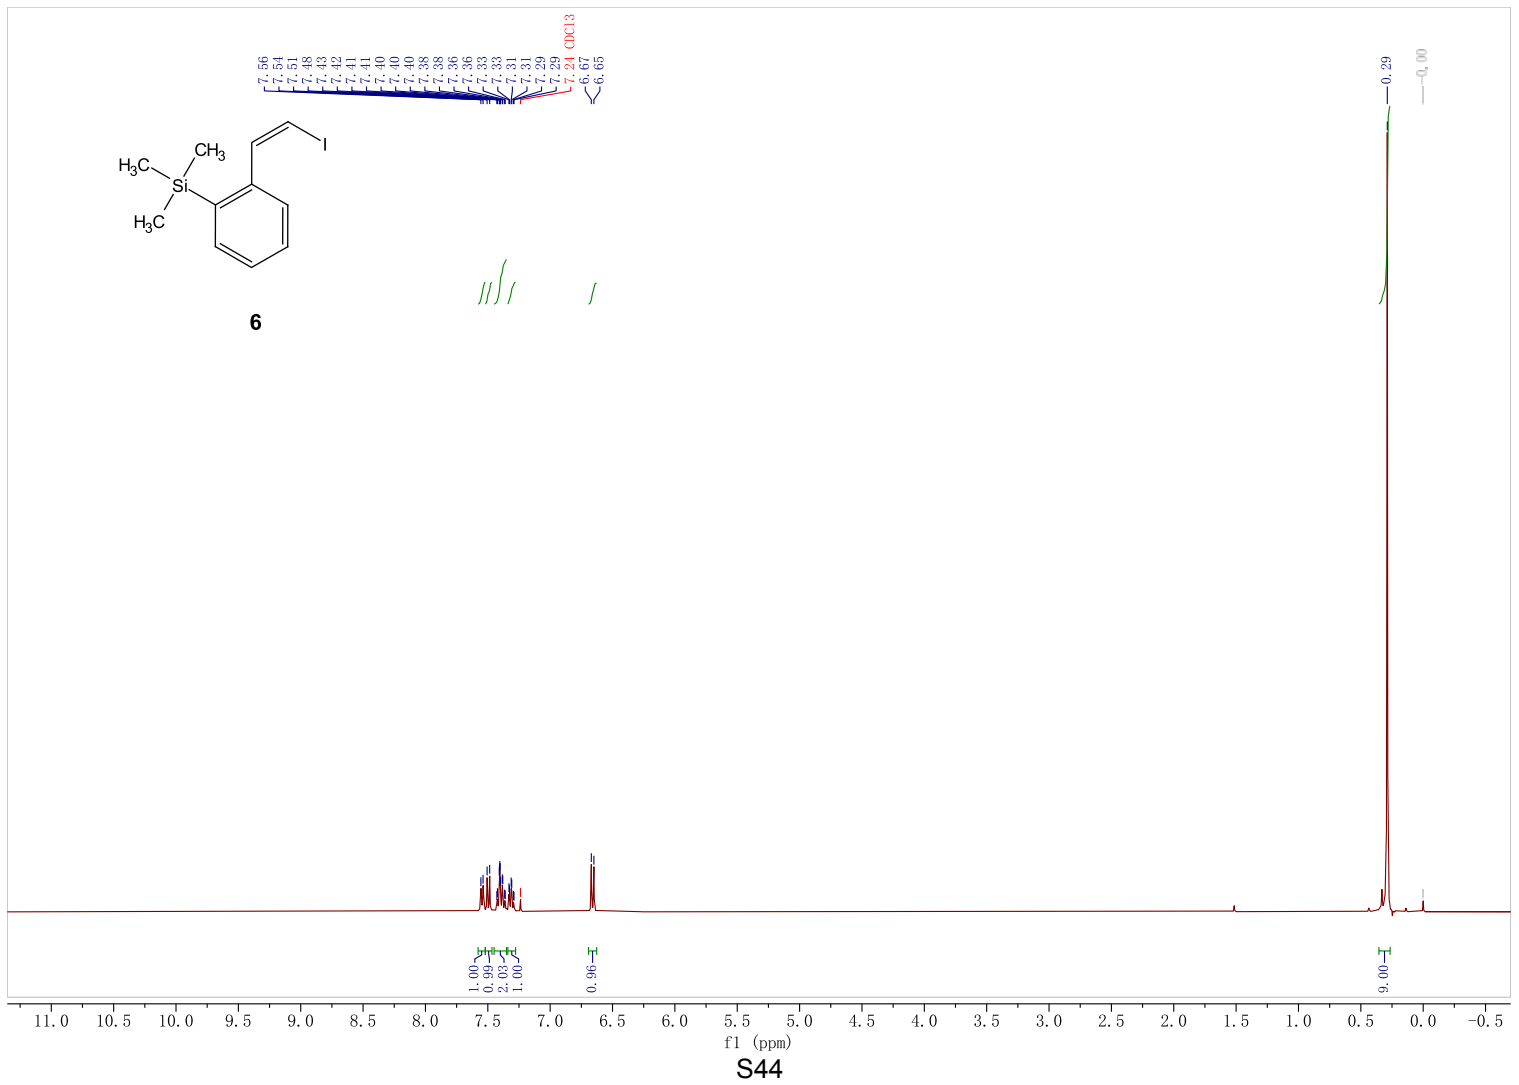

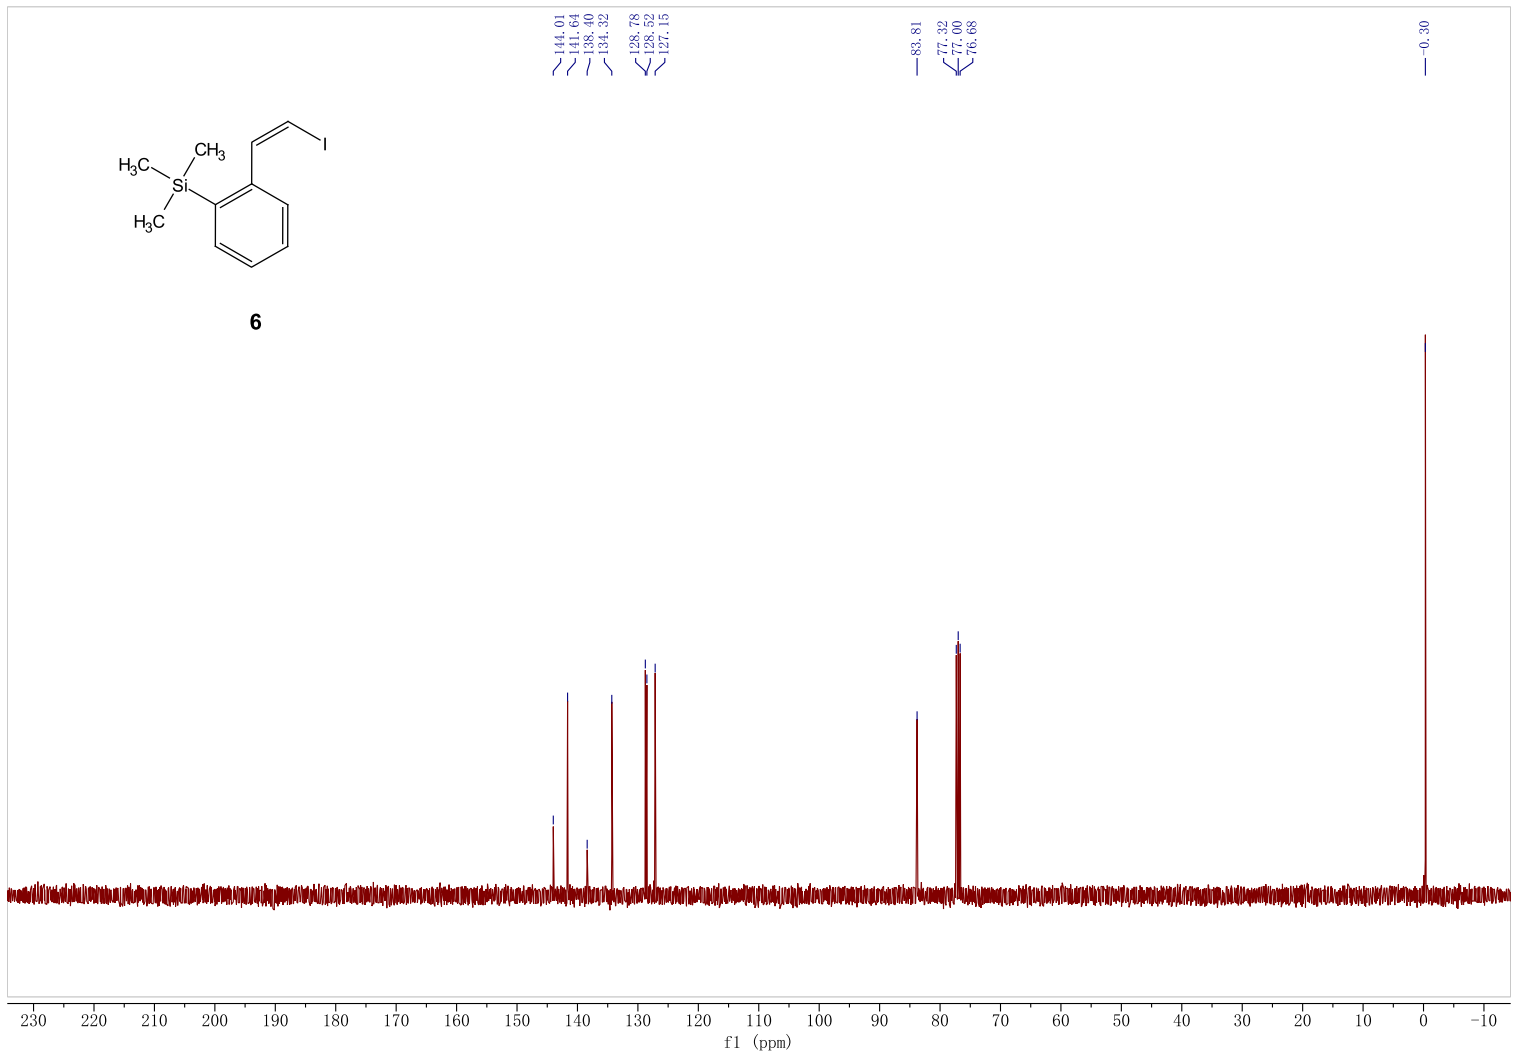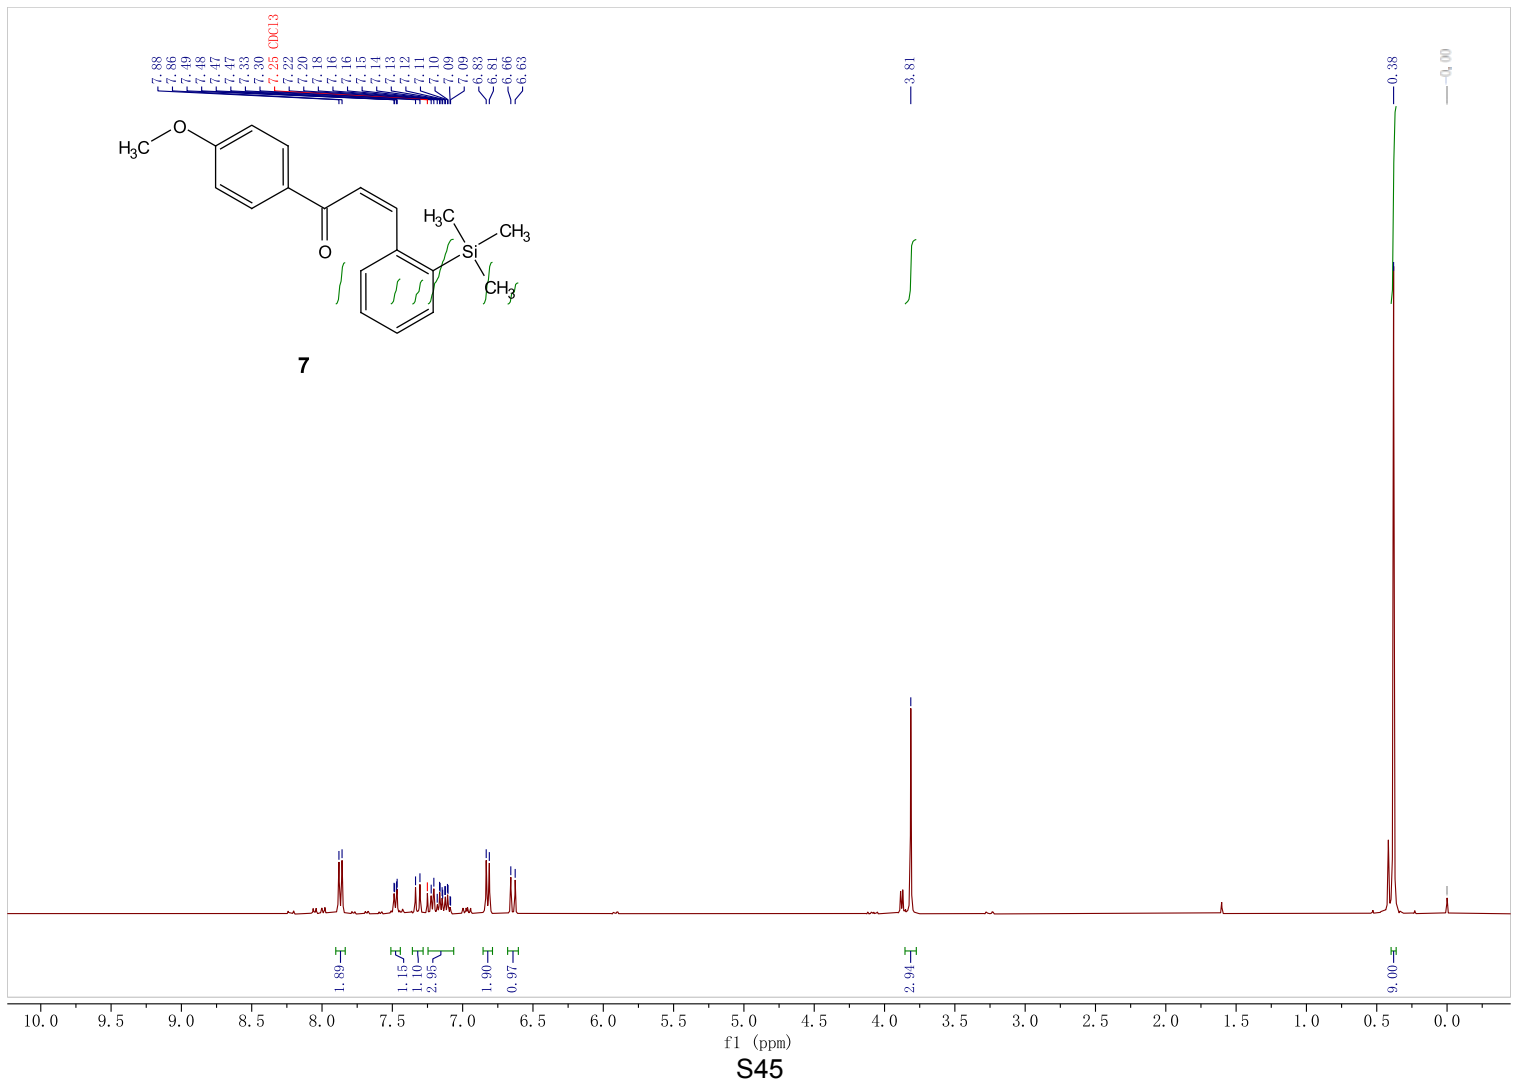

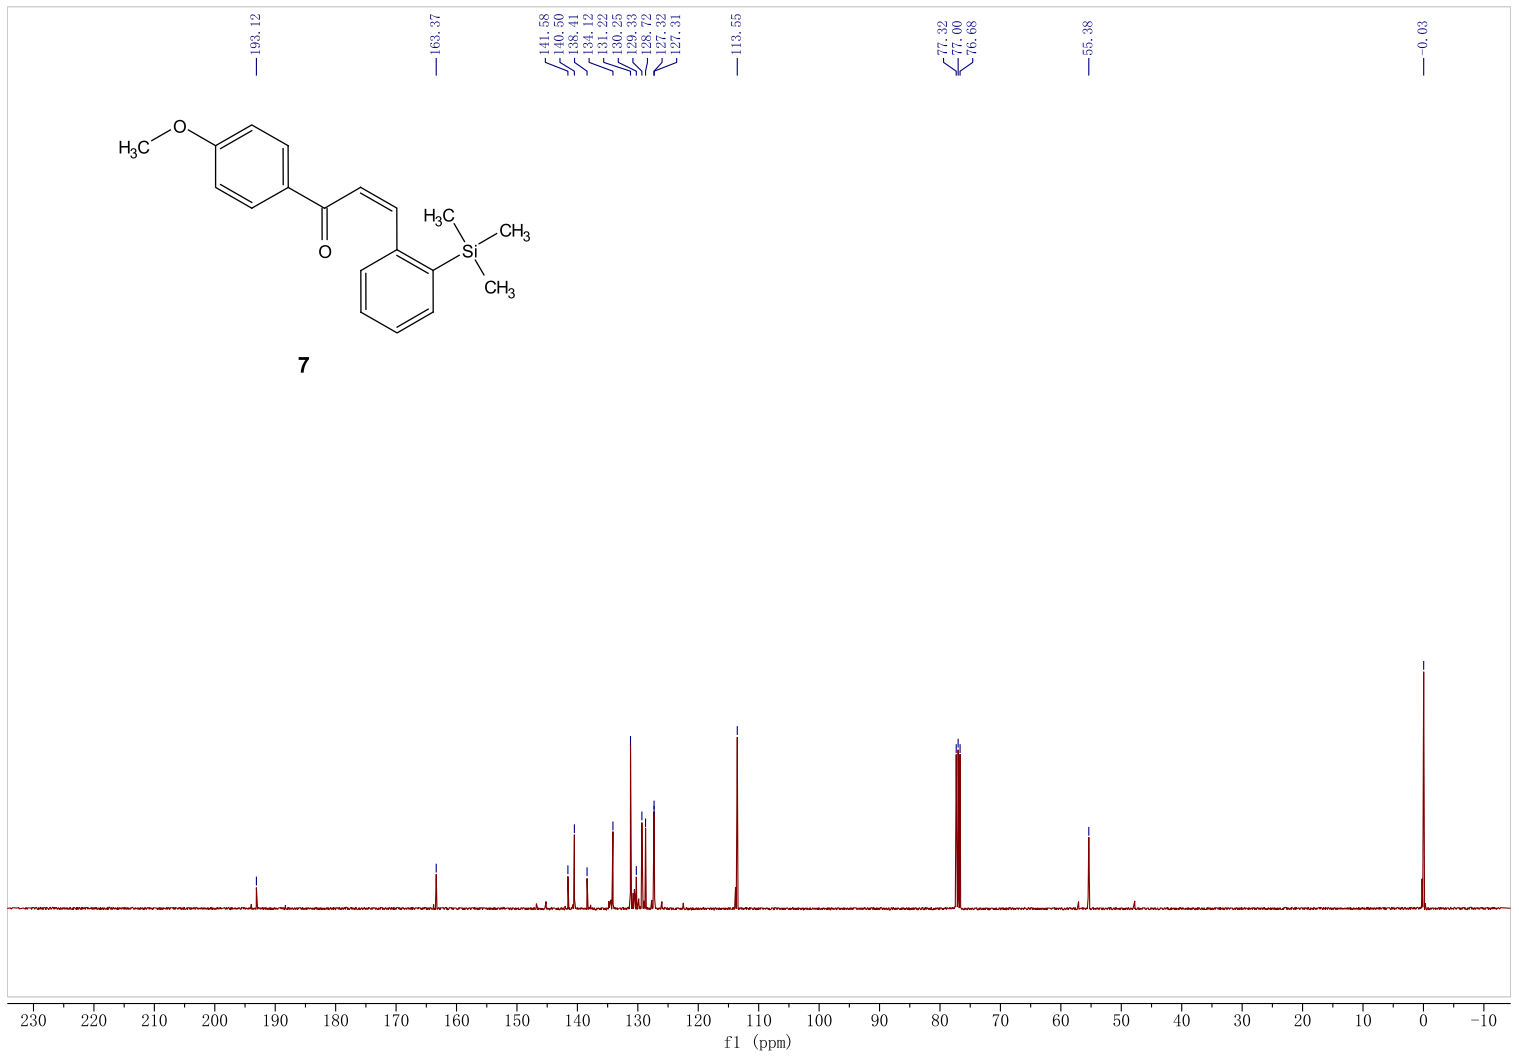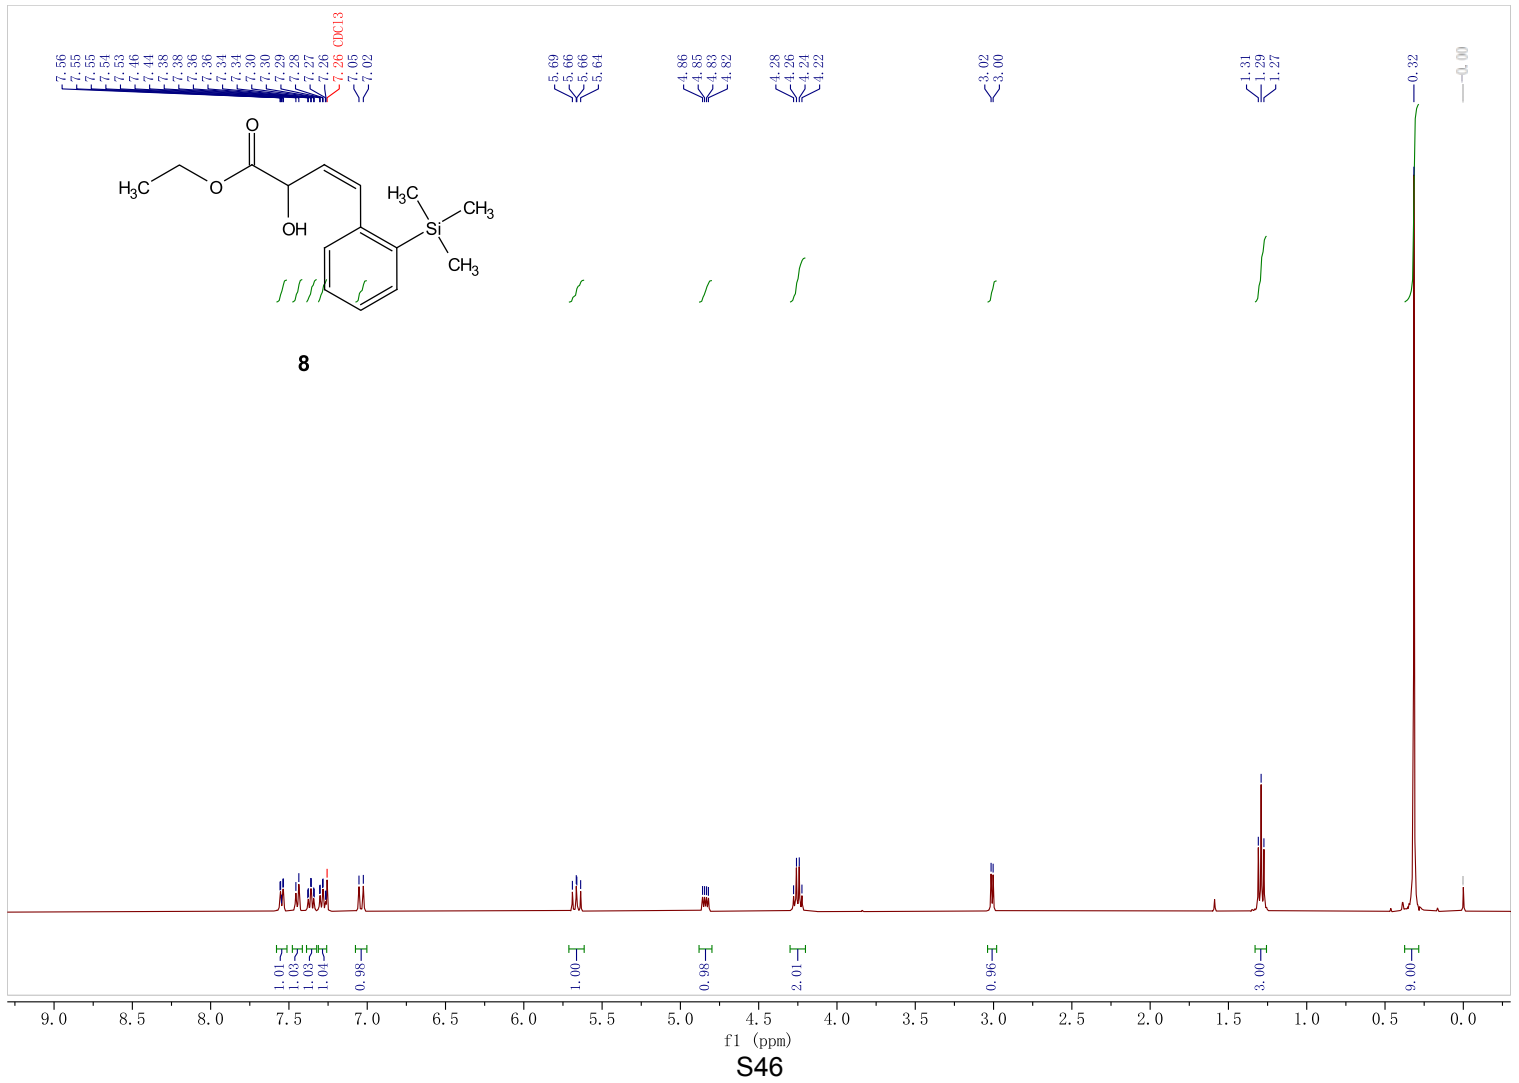

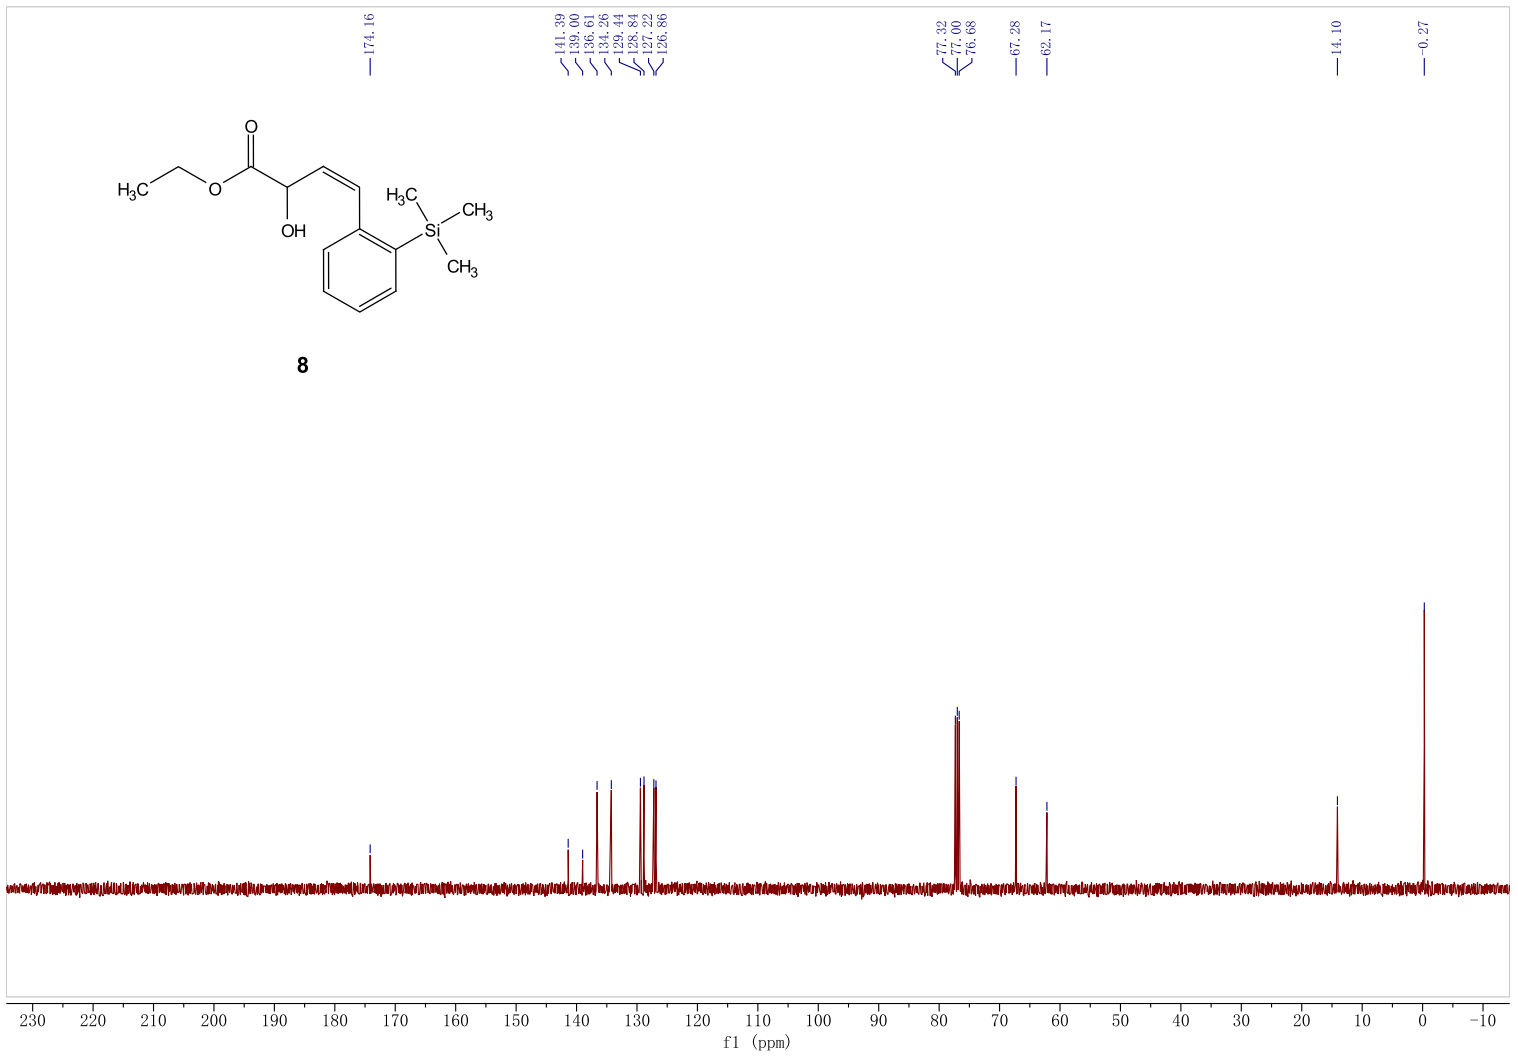

Supplement: d3cc01452e1.pdf [file d3cc01452e1.pdf]
